# Supplementary material
Source: Elsevier journal article supplement (https://comptes-rendus.academie-sciences.fr/chimie/article/10.1016/j.crci.2012.10.009/file/attach/mmc1.pdf)

## Supporting Information of $\alpha$ -Hydroxy Phosphonates

**Di-iso-propyl-1-hydroxy-1-phenylmethylphosphonate, 3c:** M.p. = 97-98 °C, IR (KBr):  $\nu = 3270, 2984, 1453, 1379, 1227, 747, 657, \text{cm}^{-1}$ ;  $^1\text{H}$  NMR (300 MHz,  $\text{CDCl}_3$ ):  $\delta = 1.14$  (d,  $J = 6$  Hz, 3H), 1.26 (d,  $J = 6$  Hz, 9H), 3.70 (br s, -OH), 4.56 - 4.68 (2H, m), 4.96 (d,  $^1J_{\text{HP}} = 11.1$  Hz, 1H) 7.29 (m, 3H, ArHs), 7.52 (d,  $J = 7.8$  Hz, 2H, ArHs),  $^{13}\text{C}$  NMR (75.4 MHz,  $\text{CDCl}_3$ ):  $\delta = 23.54$  (d,  $^3J_{\text{CP}} = 4.5$  Hz), 23.83 (d,  $^3J_{\text{CP}} = 4.5$  Hz), 24.02 (d,  $^3J_{\text{CP}} = 3.75$  Hz), 24.14 (d,  $^3J_{\text{CP}} = 3.0$  Hz), 71.06 (d,  $^1J_{\text{CP}} = 159.0$  Hz, PCOH), 71.72 (d,  $^2J_{\text{CP}} = 7.25$  Hz), 72.02 (d,  $^2J_{\text{CP}} = 6.75$  Hz), 127.25, 127.17, 127.90, 128.80 ppm; HRMS: Mass calculated for  $\text{C}_{13}\text{H}_{21}\text{O}_4\text{P}$ : 273.1256 (M+H) and 295.1074 (M+Na); Obs. mass 273.0682 (M+H) and 295.1072 (M+Na).

**Di-iso-propyl-1-hydroxy-1-(4-chlorophenyl) methylphosphonate, 3f:** M.p.= 130-132 °C, IR (KBr):  $\nu = 3263, 2981, 1491, 1376, 1233, 837, 765 \text{ cm}^{-1}$ ,  $^1\text{H}$  NMR (300 MHz,  $\text{CDCl}_3$ ):  $\delta = 1.18$  (d,  $J = 6$  Hz, 3H), 1.28 (d,  $J = 6$  Hz, 9H), 3.42 (br s, -OH), 4.61-4.68 (m, 2H), 4.94 (d,  $^1J_{\text{HP}} = 10.8$  Hz, 1H) 7.31 (d,  $J = 6.9$  Hz, 2H, ArHs) 7.42 (d,  $J = 6.9$  Hz, 2H, ArHs),  $^{13}\text{C}$  NMR (75 MHz,  $\text{CDCl}_3$ ):  $\delta = 23.63$  (d,  $^3J_{\text{CP}} = 4.5$  Hz), 23.88 (d,  $^3J_{\text{CP}} = 4.5$  Hz), 23.96 (d,  $^3J_{\text{CP}} = 4.5$  Hz), 24.09 (d,  $^3J_{\text{CP}} = 4.5$  Hz), 70.64 (d,  $^1J_{\text{CP}} = 160.5$  Hz, PCOH), 71.83 (d,  $^2J_{\text{CP}} = 6.75$  Hz), 72.16 (d,  $^2J_{\text{CP}} = 6.75$  Hz), 128.20 128.51, 133.61, 135.39, HRMS: Mass calculated for  $\text{C}_{13}\text{H}_{20}\text{PO}_4\text{Cl}$ : 307.7302 (M+H) and 329.7120 (M+Na); Obs. mass 307.2793 (M + H) and 329.3219 (M + Na).

### **Di-iso-propyl-1-hydroxy-1-(4-methylphenyl) methylphosphonate, 3i:**

M. p. = 122-124 °C,  $^1\text{H}$  NMR (300 MHz,  $\text{CDCl}_3$ ):  $\delta = 1.15$  (d,  $J = 6$  Hz, 3H), 1.26 (d,  $J = 6.0$  Hz, 9H), 2.35 (s, 3H), 3.25 (br s, OH), 4.58- 4.67 (m, 2H), 4.99 (d,  $^1J_{\text{HP}} = 10.2$  Hz, 1H) 7.14 (d,  $J = 7.8$  Hz, 2H, ArHs) 7.35 (d,  $J = 6.6$  Hz, 2H, ArHs),  $^{13}\text{C}$  NMR (75 MHz,

CDCl<sub>3</sub>): 21.21 (CH<sub>3</sub>), 23.60 (d, <sup>3</sup>J<sub>CP</sub> = 5.3 Hz), 23.88 (d, <sup>3</sup>J<sub>CP</sub> = 4.2 Hz), 24.10 (d, <sup>3</sup>J<sub>CP</sub> = 3.7 Hz), 24.19 (d, <sup>3</sup>J<sub>CP</sub> = 3.0 Hz), 70.91 (d, <sup>1</sup>J<sub>CP</sub> = 159.85 Hz, ArCH), 71.49 (d, <sup>2</sup>J<sub>CP</sub> = 7.5 Hz), 71.77 (d, <sup>2</sup>J<sub>CP</sub> = 6.8 Hz), 127.10, 128.77, 133.50, 137.48; HRMS: Mass calculated for C<sub>14</sub>H<sub>23</sub>O<sub>4</sub>P: 287.1413(M+H) and 309.1231(M+Na); Obs. mass 287.2484 (M + H) and 309.2472 (M + Na).

**Di-iso-propyl-1-hydroxy-1-(4-methoxyphenyl) methylphosphonate, 3k:** M. p. = 152-153 °C, IR (KBr): ν = 3271, 2979, 1614, 1512, 1378, 1227, 998, 837, 673, 558 cm<sup>-1</sup>, <sup>1</sup>H NMR (300 MHz, CDCl<sub>3</sub>): δ = 1.13 (d, J = 6 Hz, 3H), 1.27 (d, J = 6.3 Hz, 9H), 2.76 (br s, OH), 3.80 (s, 3H) 4.56- 4.66 (m, 2H), 4.88 (d, <sup>1</sup>J<sub>HP</sub> = 10.2 Hz, 1H) 6.88 (d, J = 8.7 Hz, 2H, ArHs) 7.40 (d, J = 8.6 Hz, 2H, ArHs), <sup>13</sup>C NMR (75 MHz, CDCl<sub>3</sub>): 23.59 (d, <sup>3</sup>J<sub>CP</sub> = 5.25 Hz), 23.87 (d, <sup>3</sup>J<sub>CP</sub> = 5.25 Hz), 24.06 (d, <sup>3</sup>J<sub>CP</sub> = 3.75 Hz), 24.16 (d, <sup>3</sup>J<sub>CP</sub> = 3.75 Hz), 55.24 (OCH<sub>3</sub>), 70.57 (d, <sup>1</sup>J<sub>CP</sub> = 147 Hz, ArH), 71.87 (d, <sup>2</sup>J<sub>CP</sub> = 7.5 Hz), 113.57, 113.60, 128.56, 128.64, 128.75, 159.42; HRMS: Mass calculated for C<sub>14</sub>H<sub>23</sub>O<sub>5</sub>P: 303.1362 (M+H) and 325.1180 (M+Na); Obs. mass 303.3655 (M + H) and 325.3070 (M + Na).

**Di-iso-propyl-1-hydroxy-1-(4-iso-propylphenyl) methylphosphonate, 3m:** M.p. = 118-119 °C, IR (KBr): ν = 3270, 2978, 1513, 1238, 993 cm<sup>-1</sup>, <sup>1</sup>H NMR (300 MHz, CDCl<sub>3</sub>): δ = 1.09 (d, J = 6 Hz, 3H), 1.23 (brs, 15H), 2.64 (br s, -OH), 2.89 (m, 1H), 4.55-4.68 (m, 2H), 4.88 (d, <sup>1</sup>J<sub>HP</sub> = 10.8 Hz, 1H) 7.18 (d, J = 8.1 Hz, 2H, ArH) 7.40 (d, J = 8.3 Hz, 2H, ArH), <sup>13</sup>C NMR (75 MHz, CDCl<sub>3</sub>): δ = 23.44 (d, <sup>3</sup>J<sub>CP</sub> = 5.0 Hz), 23.81 (d, <sup>3</sup>J<sub>CP</sub> = 5.25 Hz), 23.95 (2 x CH<sub>3</sub>), 24.03 (d, <sup>3</sup>J<sub>CP</sub> = 3.75 Hz), 24.15 (d, <sup>3</sup>J<sub>CP</sub> = 3.00 Hz), 33.81, 70.92 (d, <sup>1</sup>J<sub>CP</sub> = 160.5 Hz, CPOH), 71.58 (d, <sup>2</sup>J<sub>CP</sub> = 7.5 Hz), 71.92 (d, <sup>2</sup>J<sub>CP</sub> = 7.5 Hz) 126.10, 127.31, 134.26, 148.53; HRMS: Mass calculated for C<sub>16</sub>H<sub>27</sub>O<sub>4</sub>P: 315.1726 (M+H) and 337.1544 (M+Na); Obs. mass 315.1547 (M+H) and 337.1077 (M+Na).

**Di-iso-propyl-1-hydroxy-1-(3-nitrophenyl) methylphosphonate, 3o:** M.p. = 106-108 °C, IR (KBr):  $\nu = 3256, 2983, 1532, 1347, 1337, 1209, 995, 813, 688, 572 \text{ cm}^{-1}$ ,  $^1\text{H}$  NMR (300 MHz,  $\text{CDCl}_3$ ):  $\delta = 1.28$  (d,  $J = 6 \text{ Hz}$ , 12H), 4.60-4.65 (m, 2H) 5.11 (d,  $^1J_{\text{HP}} = 11.4 \text{ Hz}$ , 1H) 7.50 (t,  $J = 8.1 \text{ Hz}$ , 1H, ArH) 7.81 (d,  $J = 7.5 \text{ Hz}$ , 1H, ArH) 8.13 (d,  $J = 8.1 \text{ Hz}$ , 1H, ArH), 8.42 (br s, 1H, ArH),  $^{13}\text{C}$  NMR (75 MHz,  $\text{CDCl}_3$ ):  $\delta = 23.68$  (d,  $^3J_{\text{CP}} = 5.2 \text{ Hz}$ ), 23.86 (d,  $^3J_{\text{CP}} = 3.75 \text{ Hz}$ ), 23.93 (d,  $^3J_{\text{CP}} = 5.2 \text{ Hz}$ ), 24.08 (d,  $^3J_{\text{CP}} = 3.0 \text{ Hz}$ ), 70.00 (d,  $^1J_{\text{CP}} = 160.5 \text{ Hz}$ , PCOH), 72.16 (d,  $^2J_{\text{CP}} = 7.5 \text{ Hz}$ ), 72.72 (d,  $^2J_{\text{CP}} = 7.5 \text{ Hz}$ ), 122.21, 122.52, 128.72, 133.17, 139.70, 148.40; HRMS: Mass calculated for  $\text{C}_{13}\text{H}_{20}\text{NO}_6\text{P}$ : 318.2827 (M+H) and 340.2645 (M+Na); Obs. mass 318.1630 (M+H) and 340.3884 (M+Na).

**Di-iso-propyl-1-hydroxy-1-(4-cyanophenyl) methylphosphonate, 3q:** M.P. = 128-130 °C, IR (KBr):  $\nu = 3410, 2983, 2233, 1608, 1385, 765, 578 \text{ cm}^{-1}$ ,  $^1\text{H}$  NMR (300 MHz,  $\text{CDCl}_3$ ):  $\delta = 1.25$  (d,  $J = 6.4 \text{ Hz}$ , 12H), 4.62 - 4.74 (m, 2H), 5.04 (d, 1H,  $^1J_{\text{HP}} = 12.3 \text{ Hz}$ ), 7.62 (s, 4H),  $^{13}\text{C}$  NMR (75 MHz,  $\text{CDCl}_3$ ):  $\delta = 23.64$  (d,  $^3J_{\text{CP}} = 5.25 \text{ Hz}$ ), 23.86 (d,  $^3J_{\text{CP}} = 3.0 \text{ Hz}$ ), 23.91 (d,  $^3J_{\text{CP}} = 5.25 \text{ Hz}$ ), 24.05 (d,  $^3J_{\text{CP}} = 3.0 \text{ Hz}$ ), 70.39 (d,  $^1J_{\text{CP}} = 158.25 \text{ Hz}$ , PCOH), 72.09 (d,  $^2J_{\text{CP}} = 7.5 \text{ Hz}$ ), 72.56 (d,  $^2J_{\text{CP}} = 7.5 \text{ Hz}$ ), 111.37, 118.82 (CN), 127.68, 131.70, 142.63; HRMS: Mass calculated for  $\text{C}_{14}\text{H}_{20}\text{NO}_4\text{P}$ : 298.2946 (M+H) and (M+Na) 320.2843; Obs. mass 298.2862 (M+H) and 320.2470 (M+Na).

**Dimethyl-1-hydroxy-1-(3,4-methylenedioxyphenyl)methylphosphonate, 3t:** M. p. = 96-97 °C,  $^1\text{H}$  NMR (200 MHz,  $\text{CDCl}_3$ ):  $\delta = 3.67$  (d,  $^2J_{\text{CP}} = 6 \text{ Hz}$ , 3H), 3.72 (d,  $^2J_{\text{CP}} = 6 \text{ Hz}$ , 3H), 4.94 (d,  $^1J_{\text{HP}} = 10 \text{ Hz}$ , 1H), 5.95 (s, 2H), 6.77 (d,  $J = 7.8 \text{ Hz}$ ), 6.92 (d,  $J = 7.8 \text{ Hz}$ ), 7.08 (s, 1H),  $^{13}\text{C}$  NMR (50 MHz,  $\text{CDCl}_3$ ):  $\delta = 53.87, 70.37$  (d,  $^1J_{\text{CP}} = 150.63 \text{ Hz}$ , CPOH), 101.13 ( $\text{CH}_2$ ), 107.74, 108.16, 120.71, 130.14, 147.15 ppm.

**Di-iso-propyl-1-hydroxy-1-(3,4-methylenedioxyphenyl) methyl-phosphonate, 3u:**

M.p. = 114-116 °C, IR (KBr):  $\nu$  = 3263, 2982, 1505, 1225, 993, 523  $\text{cm}^{-1}$ ,  $^1\text{H}$  NMR (300 MHz,  $\text{CDCl}_3$ ):  $\delta$  = 1.18 (d,  $J$  = 6 Hz, 3H), 1.28 (d,  $J$  = 6 Hz, 9H), 3.74 (br s, -OH), 4.59-4.71 (m, 2H), 4.85 (d,  $^1J_{\text{HP}}$  = 10.2 Hz, 1H), 5.95 (s, 2H), 6.72 (d,  $J$  = 8.1 Hz, 1H, ArH), 6.93 (d,  $J$  = 7.8 Hz, 1H, ArH), 7.03 (s, 1H, ArH),  $^{13}\text{C}$  NMR (75 MHz,  $\text{CDCl}_3$ ):  $\delta$  = 23.63 (d,  $^3J_{\text{CP}}$  = 5.25 Hz), 23.88 (d,  $^3J_{\text{CP}}$  = 4.5 Hz), 24.03 (d,  $^3J_{\text{CP}}$  = 3.75 Hz), 24.16 (d,  $^3J_{\text{CP}}$  = 3.50 Hz), 70.83 (d,  $^1J_{\text{CP}}$  = 154.5 Hz, PCOH), 71.71 (d,  $^2J_{\text{CP}}$  = 7.5 Hz), 72.03 (d,  $^2J_{\text{CP}}$  = 7.5 Hz), 101.02 ( $\text{CH}_2$ ), 107.14, 120.94, 130.54, 147.33, 147.52; HRMS: Mass calculated for  $\text{C}_{14}\text{H}_{21}\text{O}_6\text{P}$ : 317.2946 (M+H) and (M+Na) 339.2764 ; Obs. mass 317.0837 (M+H) and 339.1026 (M+Na).

**Diethyl-1-hydroxy-1-(3,4-dimethoxyphenyl) methylphosphonate, 3v:** M. p. 74-76 °C, IR (KBr):  $\nu$  = 3290, 1243, 1046, 1024  $\text{cm}^{-1}$ ,  $^1\text{H}$  NMR (200 MHz,  $\text{CDCl}_3$ ):  $\delta$  = 1.19 (t,  $J$  = 8 Hz, 3H), 1.25 (t,  $J$  = 8 Hz, 3H), 3.84 (s, 6H), 3.98- 4.18 (m, 4H), 4.92 (d,  $^1J_{\text{HP}}$  = 10 Hz), 6.81 (d,  $J$  = 7.8 Hz, 1H, ArH), 6.99 (d,  $J$  = 7.8 Hz, 1H, ArH), 7.06 (s 1H),  $^{13}\text{C}$  NMR (75 MHz,  $\text{CDCl}_3$ ):  $\delta$  = 16.37, 55.72, 63.08, 70.35 (d,  $^1J_{\text{CP}}$  = 161.1 Hz, CPOH), 110.39, 110.59, 119.53, 129.07, 148.68, GCMS:  $m/z$  = 166 [ $\text{M}^-$  H- P (O)(OEt) $_2$ ], 151, 119, 95, 77, 51.

**Di-iso-propyl-1-hydroxy-1-(3,4-dimethoxyphenyl) methylphosphonate, 3w:** M. p. = 80-81 °C, IR (KBr):  $\nu$  = 3437, 2978, 1610, 1518, 1383, 1239, 1029, 737, 559  $\text{cm}^{-1}$ ,  $^1\text{H}$  NMR (300 MHz,  $\text{CDCl}_3$ ):  $\delta$  = 1.15 (d,  $J$  = 6.3 Hz, 3H), 1.27 (d,  $J$  = 6.0 Hz, 9H), 3.11 (br s, -OH), 3.88 (s,  $\text{OCH}_3$ ), 3.95 (s,  $\text{OCH}_3$ ), 4.55 - 4.70 (m, 2H), 4.88 (d,  $^1J_{\text{HP}}$  = 10.2 Hz, 1H), 6.83 (d,  $J$  = 8 Hz, 1H, ArH), 7.00 (m, 1H, ArH), 7.10 (t,  $J$  = 7.8 Hz, 1H, ArH),  $^{13}\text{C}$  NMR (75 MHz,  $\text{CDCl}_3$ ):  $\delta$  = 23.65 (d,  $^3J_{\text{CP}}$  = 5.25 Hz), 23.91 (d,  $^3J_{\text{CP}}$  = 4.50 Hz), 24.10 (d,  $^3J_{\text{CP}}$  = 3.75 Hz), 24.19 (d,  $^3J_{\text{CP}}$  = 3.0 Hz), 55.83 ( $\text{OCH}_3$ ), 56.09 ( $\text{OCH}_3$ ), 70.83 ( $^1J_{\text{CP}}$  =

161.25 Hz, CPOH), 71.65 ( $^2J_{CP} = 7.5$  Hz), 71.90 ( $^2J_{CP} = 7.5$  Hz), 110.45, 110.68, 119.86, 129.08, 148.70, 148.80; HRMS: Mass calculated for  $C_{15}H_{25}O_6P$ : 333.3371(M+H) and (M+Na) 355.3189; Obs. Mass 333.1432 (M+H) and 355.1386 (M+Na).

**Diethyl-1-hydroxy-1-(4-allyloxyphenyl) methylphosphonate, 3x:** M.p. = 64-65  $^{\circ}C$ , IR (KBr):  $\nu = 3219, 1617, 1507, 1376, 1210, 1050, 995$   $cm^{-1}$ ,  $^1H$  NMR (200 MHz,  $CDCl_3$ ):  $\delta = 1.20$  (t,  $J = 7.8$  Hz, 3H), 1.28 (t,  $J = 7.8$  Hz, 3H), 2.2 (br s, OH), 3.9-4.2 (m, 4H), 4.52 (d,  $J = 6$  Hz, 2H), 4.87 (d,  $^1J_{HP} = 10.2$  Hz, 1H), 5.30 (d,  $J = 17$  Hz, 1H), 5.37 (dd,  $J = 17$  & 2 Hz, 1H), 5.9-6.3 (m, 1H), 7.00 (d,  $J = 8$  Hz, 2H), 7.39 (d,  $J = 8$  Hz, 2H),  $^{13}C$  NMR (50 MHz,  $CDCl_3$ ):  $\delta = 16.20, 62.40, 68.24$  (OCH<sub>2</sub>), 70.18 (d,  $^1J_{CP} = 154$  Hz, PCOH), 114.32, 117.54, 128.32, 128.78, 130.04, 158.33, GCMS:  $m/z = 162$  [ M - H - P(O)(OEt)<sub>2</sub> ], 121, 77, 65.

**Di-iso-propyl-1-hydroxy-1-(4-allyloxyphenyl) methylphosphonate, 3y:** M.p. = 74-76  $^{\circ}C$ , IR (KBr):  $\nu = 3219, 2979, 1610, 1511, 1386, 1210, 1050, 995, 838, 568$   $cm^{-1}$ ,  $^1H$  NMR (300 MHz,  $CDCl_3$ ):  $\delta = 1.13$  (d,  $J = 6.3$  Hz, 3H) 1.26 (d,  $J = 6.3$  Hz, 9H), 3.28 (br s, -OH), 4.52 (d,  $J = 2.7$  Hz, 2H) 4.54-4.68 (m, 2H), 4.87 (d,  $^1J_{HP} = 10.2$  Hz, 1H), 5.27 (dd,  $J = 10.5$  Hz & 1.5 Hz, 1H), 5.40 (dd,  $J = 17.1$  & 1.5 Hz, 1H), 5.98-6.11 (m, 1H), 6.89 (d,  $J = 8.7$  Hz, 2H, ArH) 7.40 (d,  $J = 8.7$  Hz, 2H),  $^{13}C$  NMR (75 MHz,  $CDCl_3$ ):  $\delta = 23.58$  (d,  $^3J_{CP} = 5.25$  Hz), 23.87 (d,  $^3J_{CP} = 4.5$  Hz), 24.06 (d,  $^3J_{CP} = 3.0$  Hz), 24.16 (d,  $^3J_{CP} = 3.0$  Hz), 68.78 (OCH<sub>2</sub>), 70.55 (d,  $^1J_{CP} = 144.75$  Hz, PCOH), 71.68 (d,  $^2J_{CP} = 8.0$  Hz), 71.74 (d,  $^2J_{CP} = 7.5$  Hz), 114.43, 117.62, 128.54, 128.62, 128.98, 133.18, 158.41; HRMS: Mass calculated for  $C_{16}H_{25}O_5P$ : 329.3484 (M+H) and 351.3302 (M+Na); Obs. Mass 329.3671 (M+H) and 351.3886 (M+Na).

**Diethyl-1-hydroxy-1-(4-benzyloxyphenyl) methylphosphonate, 3z:** M.p. = 94-95  $^{\circ}C$ ,

IR (KBr):  $\nu = 3397, 2984, 1386, 1231, 986 \text{ cm}^{-1}$ ,  $^1\text{H NMR}$  (200 MHz,  $\text{CDCl}_3$ ):  $\delta = 1.21$  (t,  $J = 7.8 \text{ Hz}$ , 3H), 1.26 (t,  $J = 7.8 \text{ Hz}$ , 3H), 3.9-4.2 (m, 4H), 4.95 (d,  $^1J_{\text{HP}} = 10.4 \text{ Hz}$ , 1H), 5.60 (s, 2H), 6.97 (d,  $J = 8 \text{ Hz}$ , 2H, ArHs), 7.31(m, 5H) 7.39 (d,  $J = 8 \text{ Hz}$ , 2H, ArHs),  $^{13}\text{C NMR}$  (50 MHz,  $\text{CDCl}_3$ ):  $\delta = 16.20, 63.02, 69.80, 70.08$  (d,  $^1J_{\text{CP}} = 160.5 \text{ Hz}$ , PCOH), 114.44, 127.31, 128.40, 127.87, 129.10, 136.74, 158.47, GCMS:  $m/z = 350$  ( $\text{M}^+$ , weak) 252, 207, 91.

**Di-iso-propyl-1-hydroxy-1-(4-benzyloxyphenyl) methylphosphonate, 3za:** M.p.=108-110  $^{\circ}\text{C}$ ; IR (KBr):  $\nu = 3413, 2980, 1608, 1513, 1387, 1235, 1026, 735, 554 \text{ cm}^{-1}$ ,  $^1\text{H NMR}$  (300 MHz,  $\text{CDCl}_3$ ):  $\delta = 1.13$  (d,  $J = 6.3 \text{ Hz}$ , 3H) 1.28 (d,  $J = 6.0 \text{ Hz}$ , 9H), 3.08 (br s, -OH), 4.57-4.68 (m, 2H) 4.90 (d,  $^1J_{\text{HP}} = 9.9 \text{ Hz}$ , 1H), 5.12 (s, 2H), 6.96 (d,  $J = 8.7 \text{ Hz}$ , 2H, ArHs) 7.30-7.87 (m, 7H, ArHs),  $^{13}\text{C NMR}$  (75 MHz,  $\text{CDCl}_3$ ):  $\delta = 23.60$  (d,  $^3J_{\text{CP}} = 6.0 \text{ Hz}$ ), 23.87 (d,  $^3J_{\text{CP}} = 5.25 \text{ Hz}$ ), 24.07 (d,  $^3J_{\text{CP}} = 3.75 \text{ Hz}$ ), 24.17 (d,  $^3J_{\text{CP}} = 3.0 \text{ Hz}$ ), 69.79 (OCH<sub>2</sub>), 70.42 (d,  $^1J_{\text{CP}} = 151.5 \text{ Hz}$ ), 71.75 (d,  $^2J_{\text{CP}} = 7.5 \text{ Hz}$ ), 71.94 (d,  $^2J_{\text{CP}} = 7.5 \text{ Hz}$ ), 114.62, 115.15, 127.45, 127.94, 128.55, 128.63, 128.72, 128.95, 128.98, 136.90, 158.61, 158.65; HRMS: Mass calculated for  $\text{C}_{20}\text{H}_{27}\text{O}_5\text{P}$ : 379.4070 (M+H) and 401.3888 (M+Na); Obs. Mass: 379.5342 (M+H) and 401.3671 (M+Na).

**Di-iso-propyl-1-hydroxy-2-(thiophenyl) methylphosphonate, 3zc:** M.p. = 64-66  $^{\circ}\text{C}$ , IR (KBr):  $\nu = 3245, 2984, 1386, 1231, 986, 704, 555 \text{ cm}^{-1}$ ,  $^1\text{H NMR}$  (300 MHz,  $\text{CDCl}_3$ ):  $\delta = 1.19$  (d,  $J = 6.3 \text{ Hz}$ , 3H), 1.31 (d,  $J = 6.3 \text{ Hz}$ , 9H), 3.59 (br s, -OH), 4.67 - 4.74 (m, 2H), 5.16 (d,  $^1J_{\text{HP}} = 10.8 \text{ Hz}$ , 1H), 6.99 (t,  $J = 4.1 \text{ Hz}$ , 1H), 7.18 (t,  $J = 3.8 \text{ Hz}$ , 1H), 7.28 (1H, dd,  $J = 4.0 \text{ Hz}$  and  $1.2 \text{ Hz}$ ),  $^{13}\text{C NMR}$  (75 MHz,  $\text{CDCl}_3$ ):  $\delta = 23.58$  (d,  $^3J_{\text{CP}} = 5.25 \text{ Hz}$ ), 23.86 (d,  $^3J_{\text{CP}} = 4.5 \text{ Hz}$ ), 24.03 (d,  $^3J_{\text{CP}} = 3.75 \text{ Hz}$ ), 24.18 (d,  $^3J_{\text{CP}} = 3.00 \text{ Hz}$ ), 67.24 (d,  $^1J_{\text{CP}} = 166.5 \text{ Hz}$ , PCOH), 72.05 (d,  $^2J_{\text{CP}} = 3.75 \text{ Hz}$ ), 72.44 ( $^2J_{\text{CP}} = 3.75 \text{ Hz}$ ), 125.49, 126.09, 126.66, 139.22, HRMS: Mass calculated for  $\text{C}_{11}\text{H}_{19}\text{O}_4\text{PS}$ : 279.3128 (M+H); Obs. Mass: 279.0441 (M+H)

# $\alpha$ -Hydroxy Phosphonates

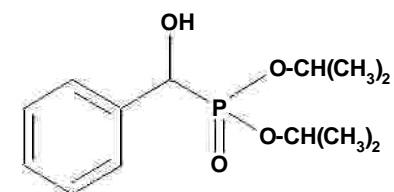

Dept of Chemistry, Shivaji University, Kolhapur

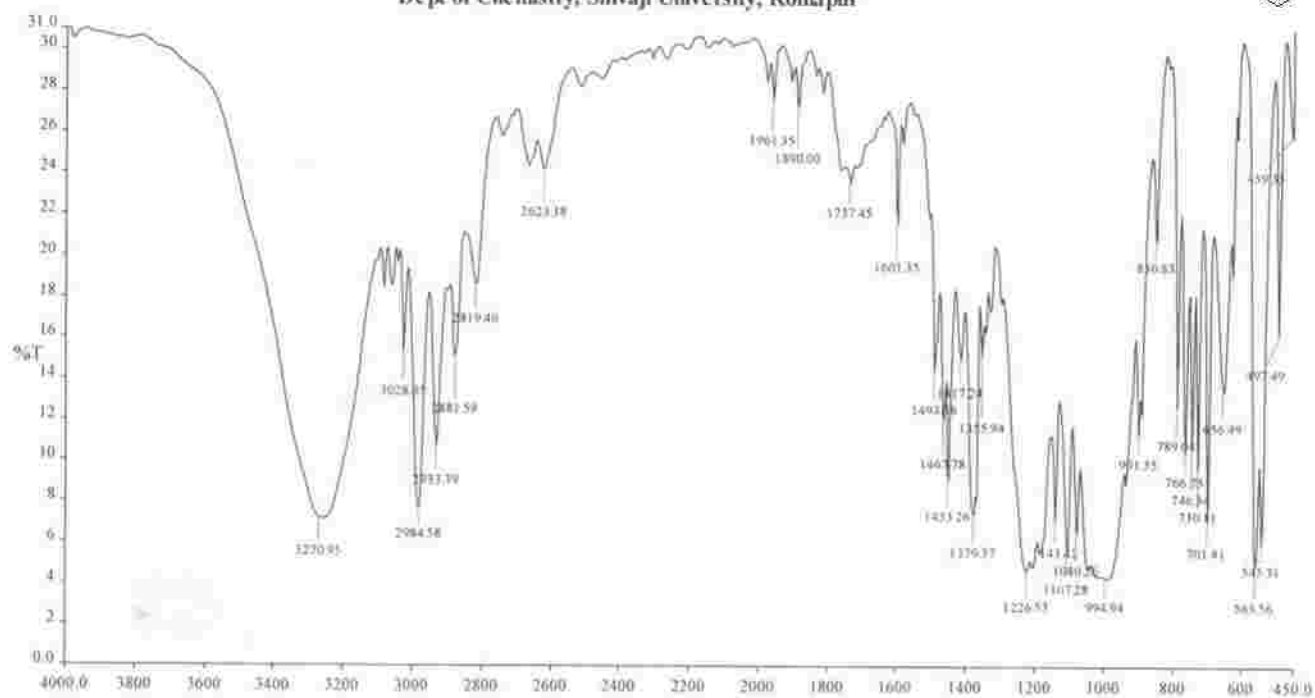

Date Created: 23 September, 2010 8:49 PM India Standard Time

INSTRUMENT MODEL: PERKIN ELMER SPECTRUM 100,  
Instrument Serial Number: 79720

— Ipr-10.002 - 23-09-10

ANALYSIS:  
**cm-1**



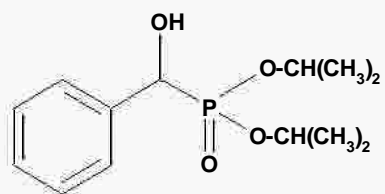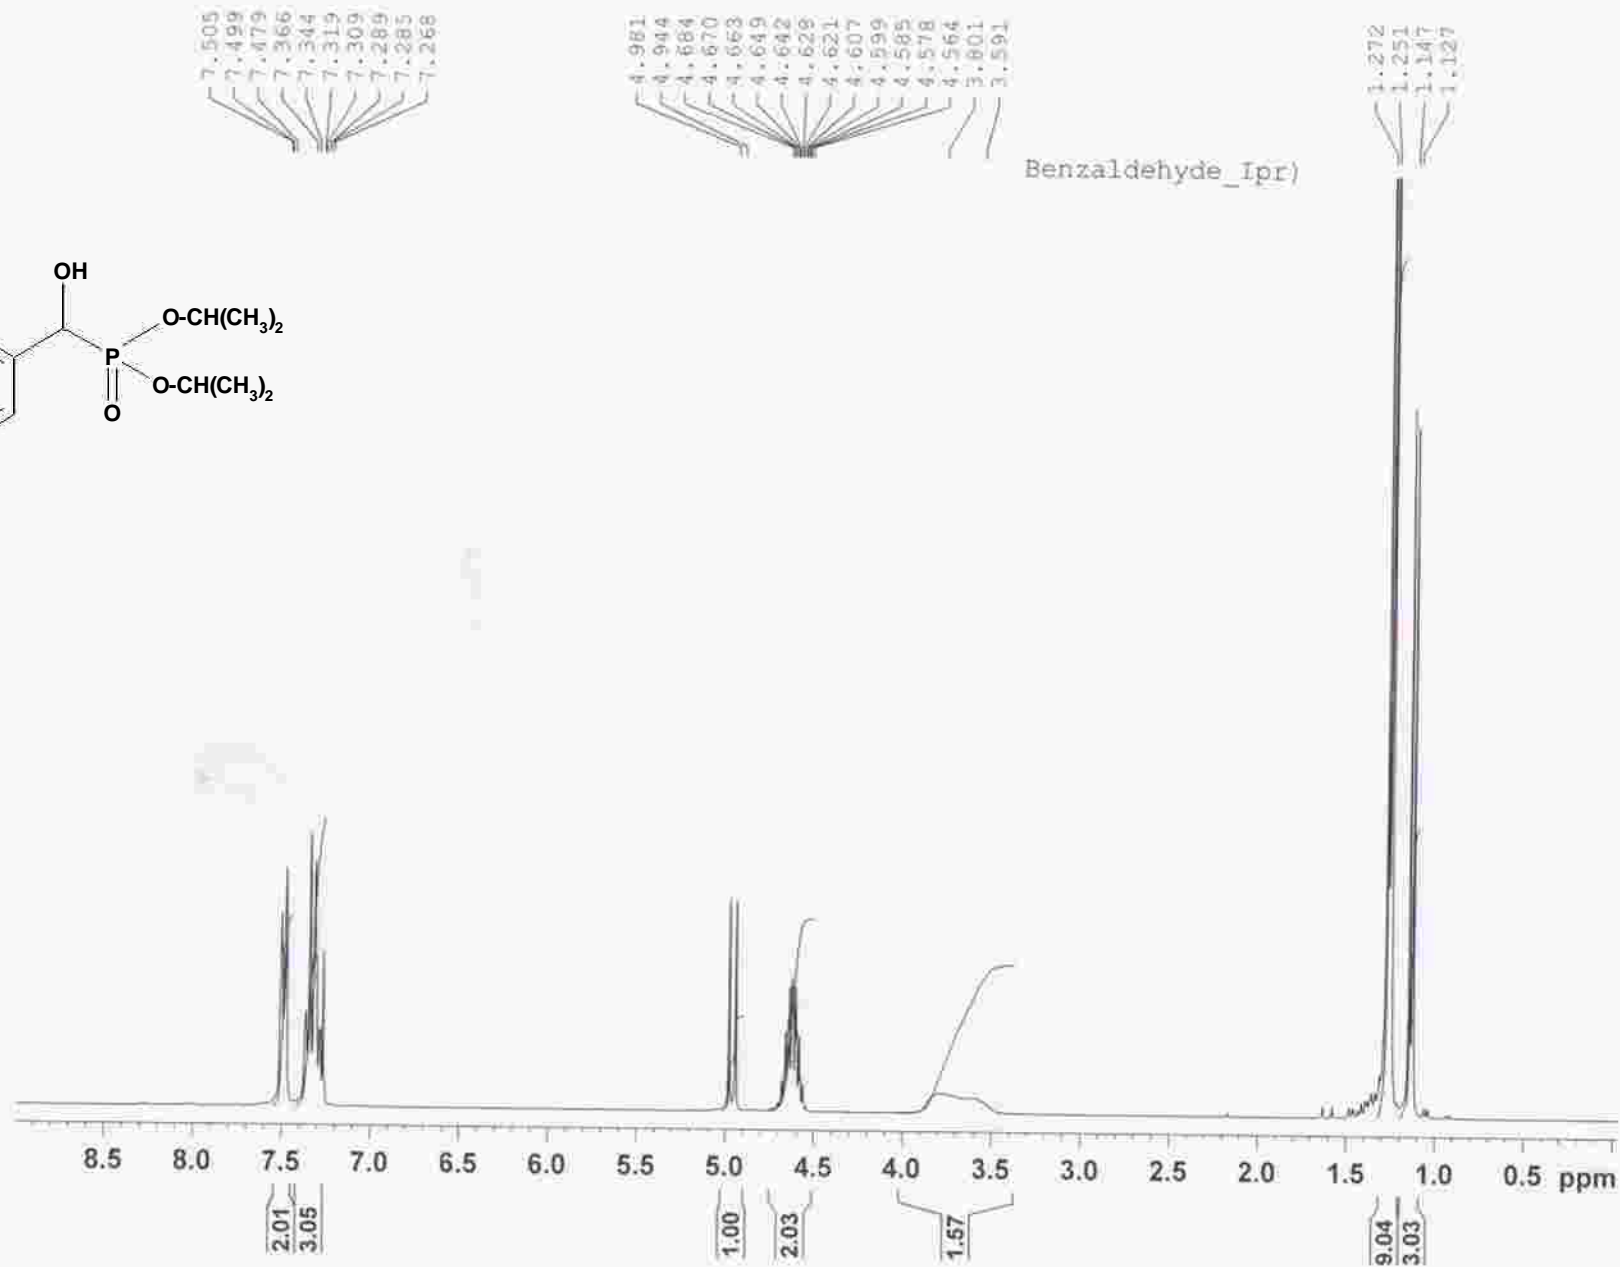

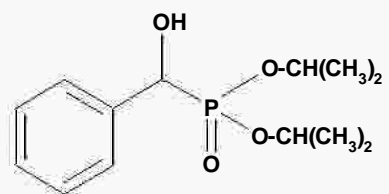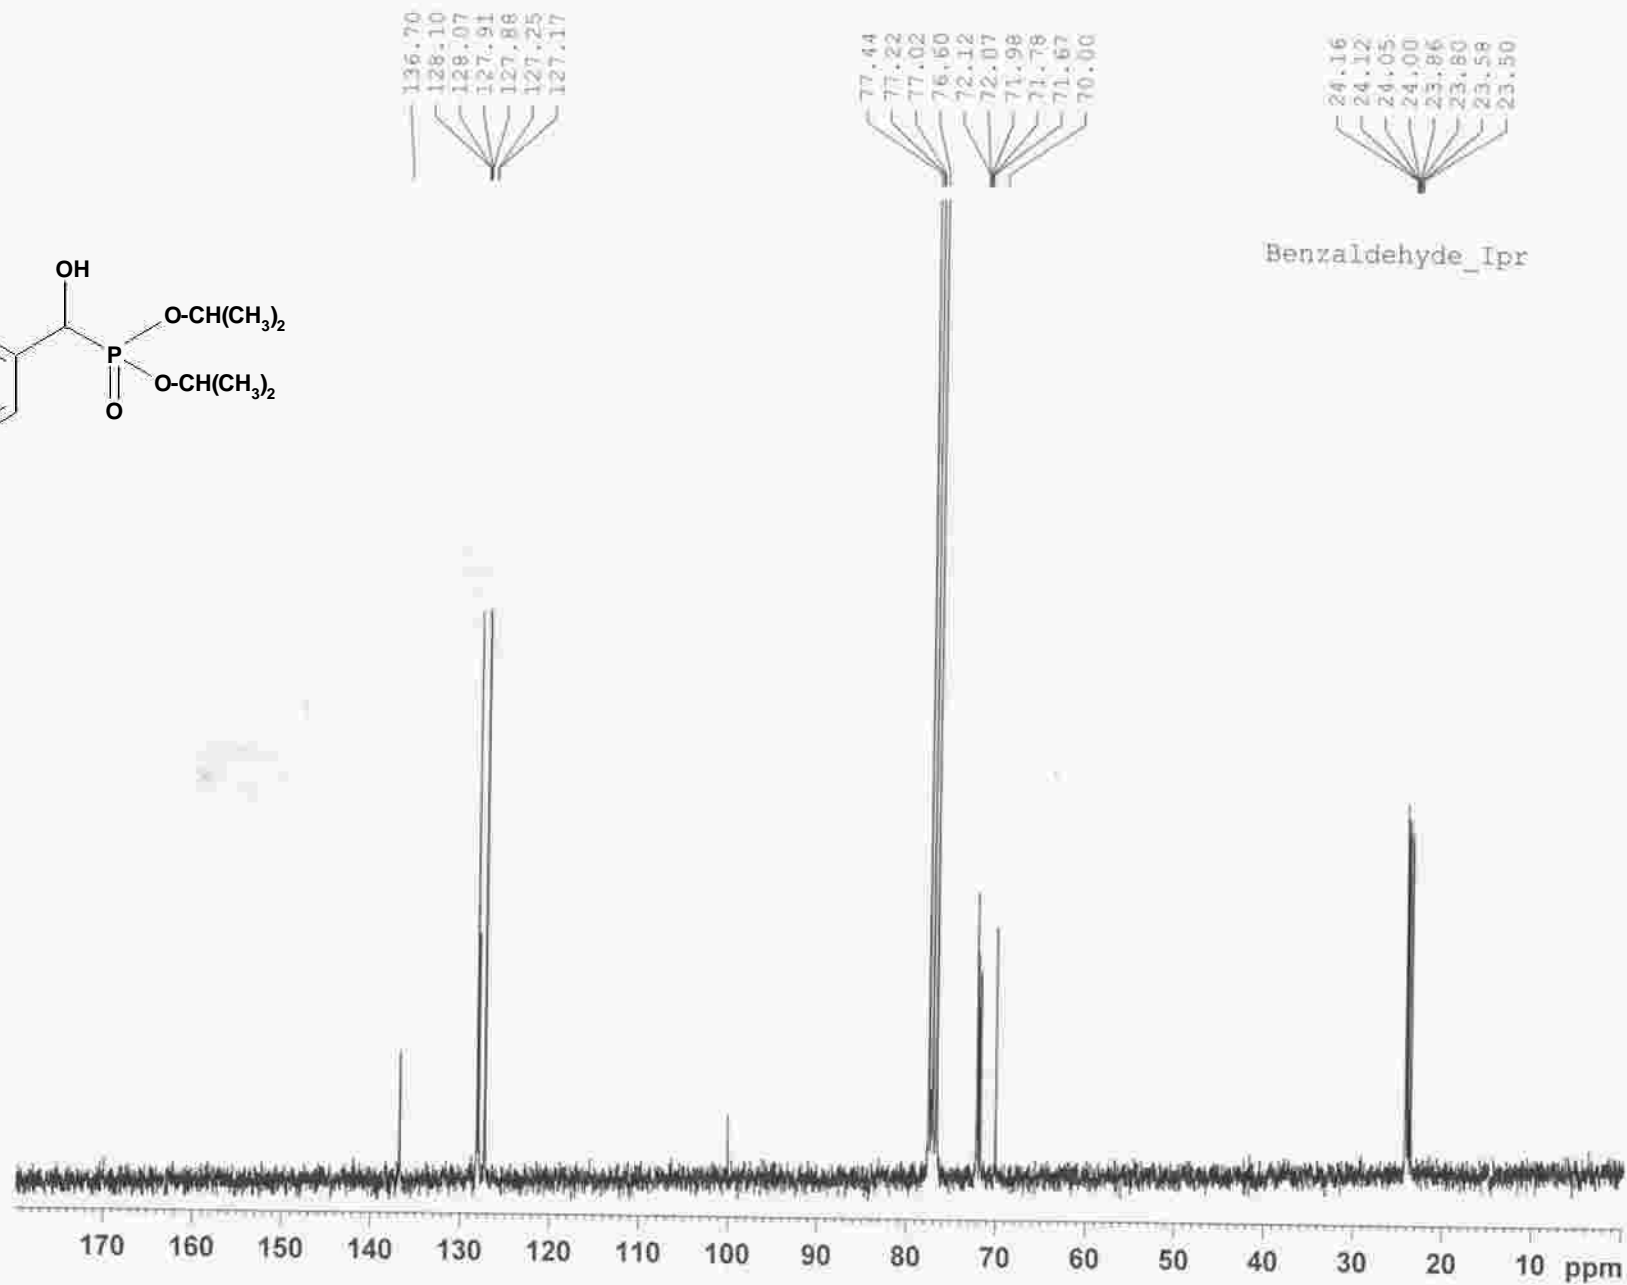

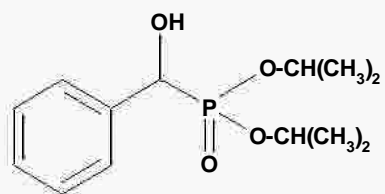

128.103  
127.915  
127.247  
127.171

72.108  
72.011  
71.810  
69.987

24.125  
24.049  
23.868  
23.575  
23.507

Benzaldehyde\_Ipr

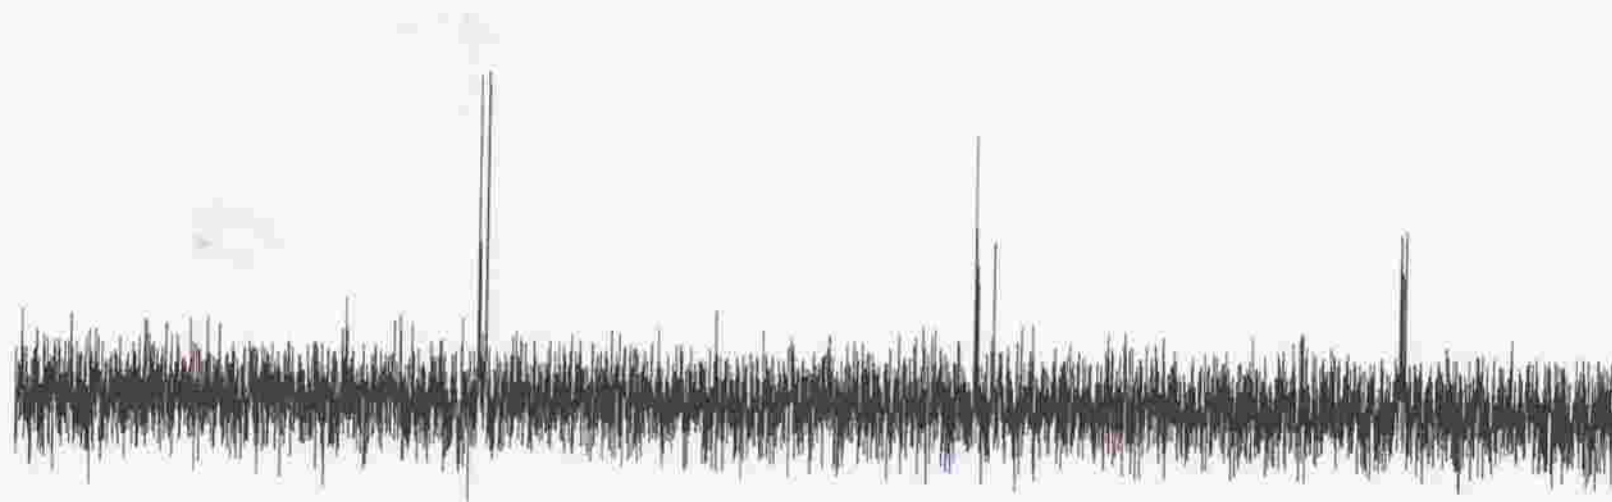

170 160 150 140 130 120 110 100 90 80 70 60 50 40 30 20 10 ppm

+TOF MS: 0.017 to 0.483 min from BENZ\_DIPR.wiff  
 a=3.37719425928799980e-004, t0=-3.54887063182468410e+001

Max: 538.2 counts

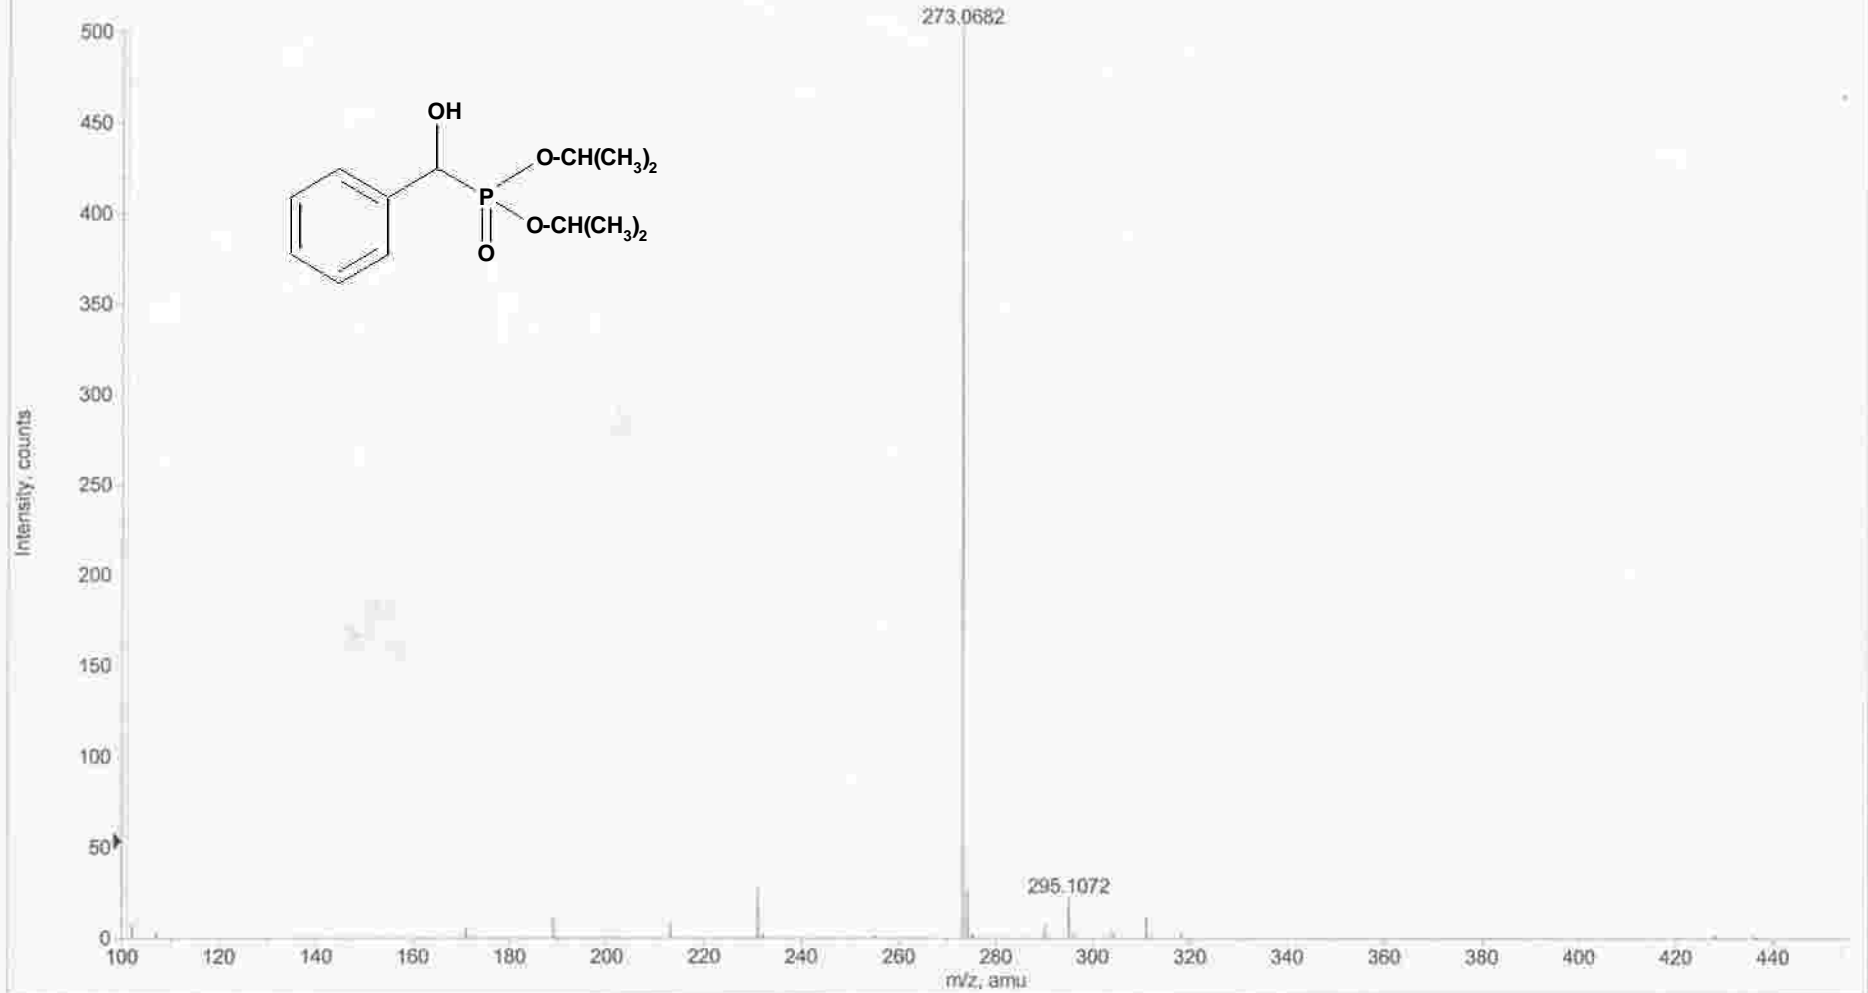

Dept of Chemistry, Shivaji University, Kolhapur

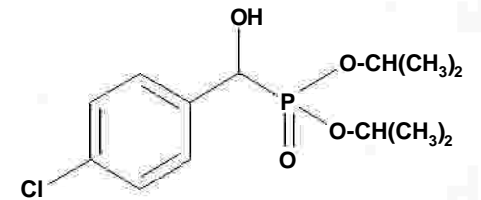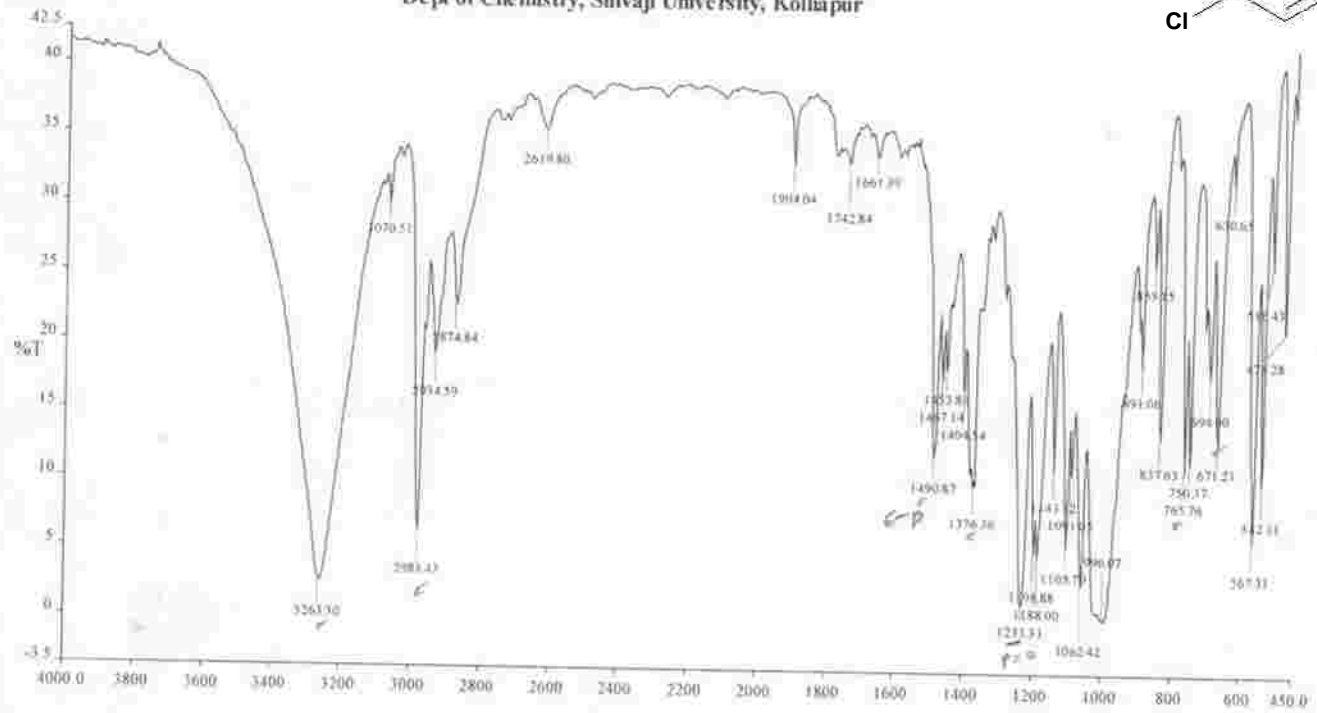

INSTRUMENT MODEL: PERKIN ELMER SPECTRUM 100.  
Instrument Serial Number: 79720

1pr-2.002 - 23-09-10

Date Created: 23 September, 2010 3:57 PM India Standard Time

ANALYSIS:

**cm-1**

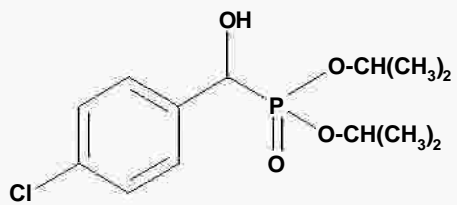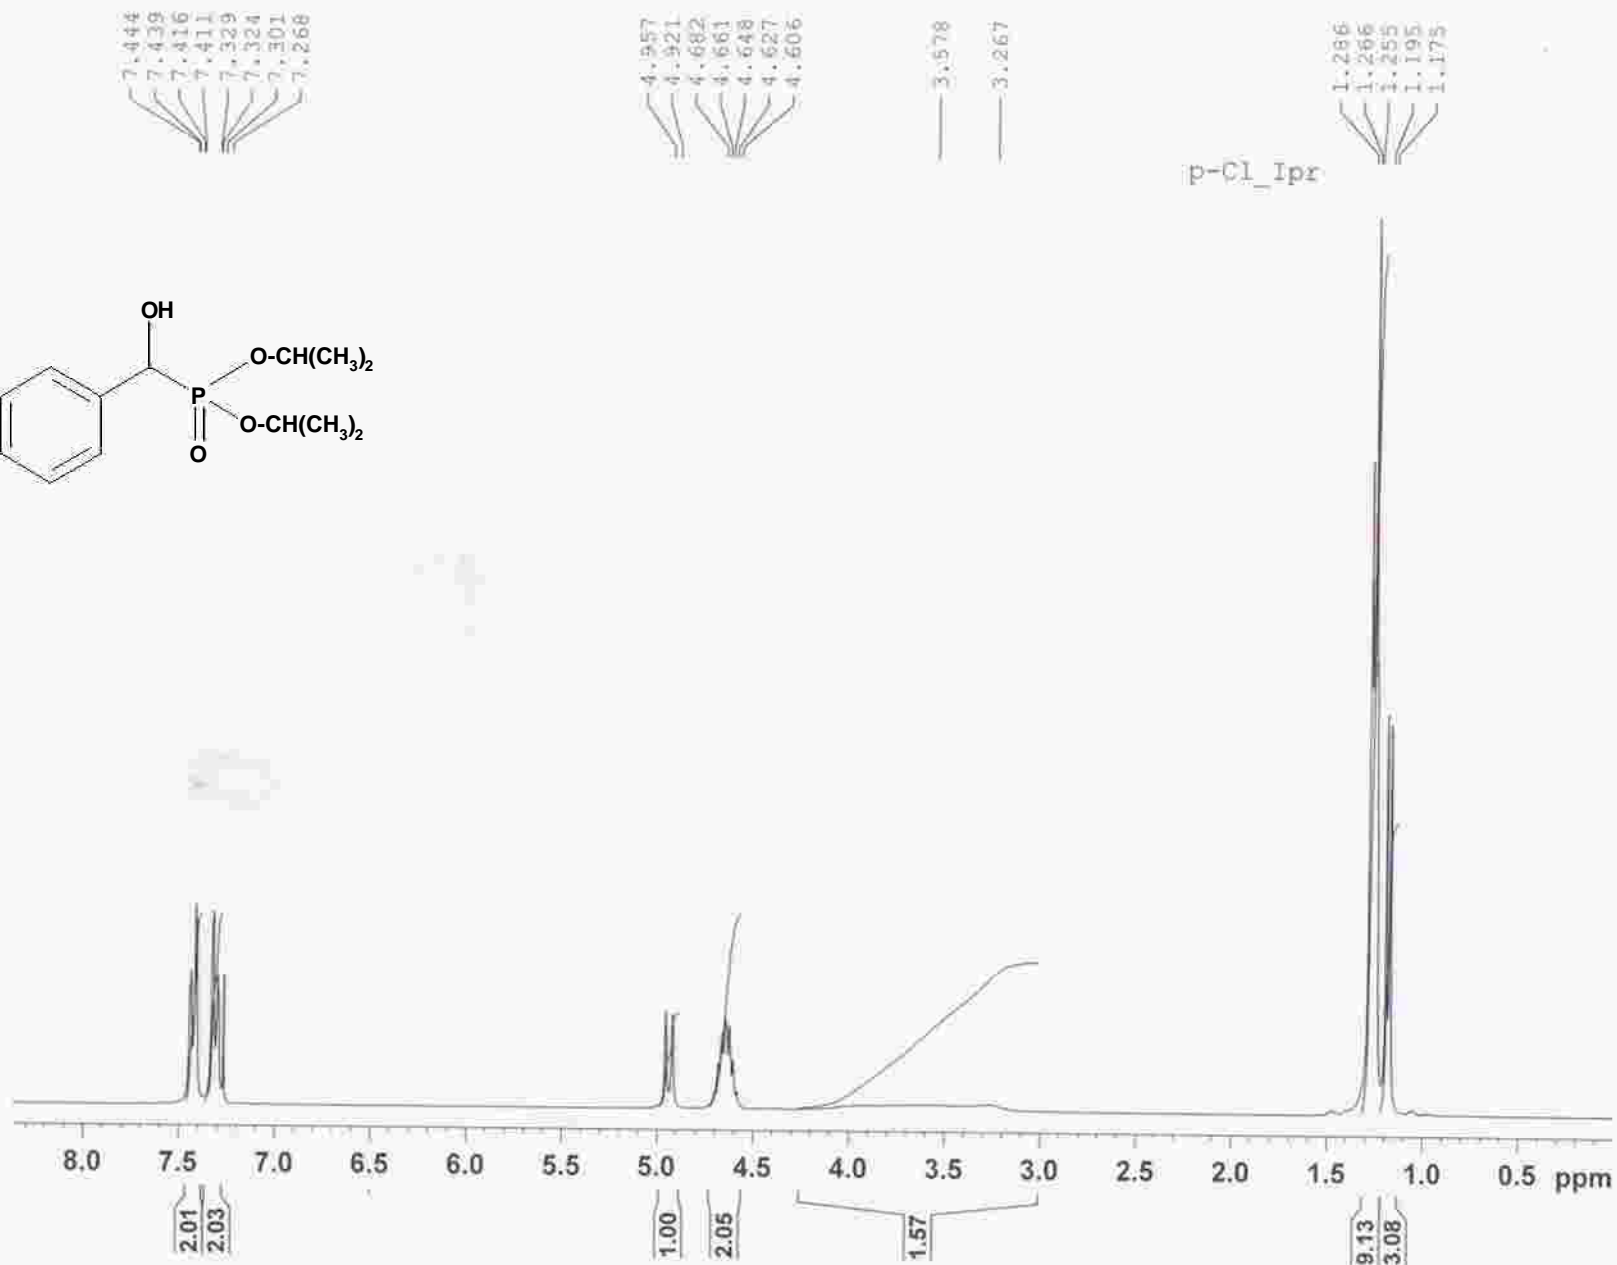

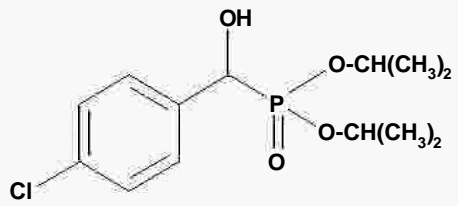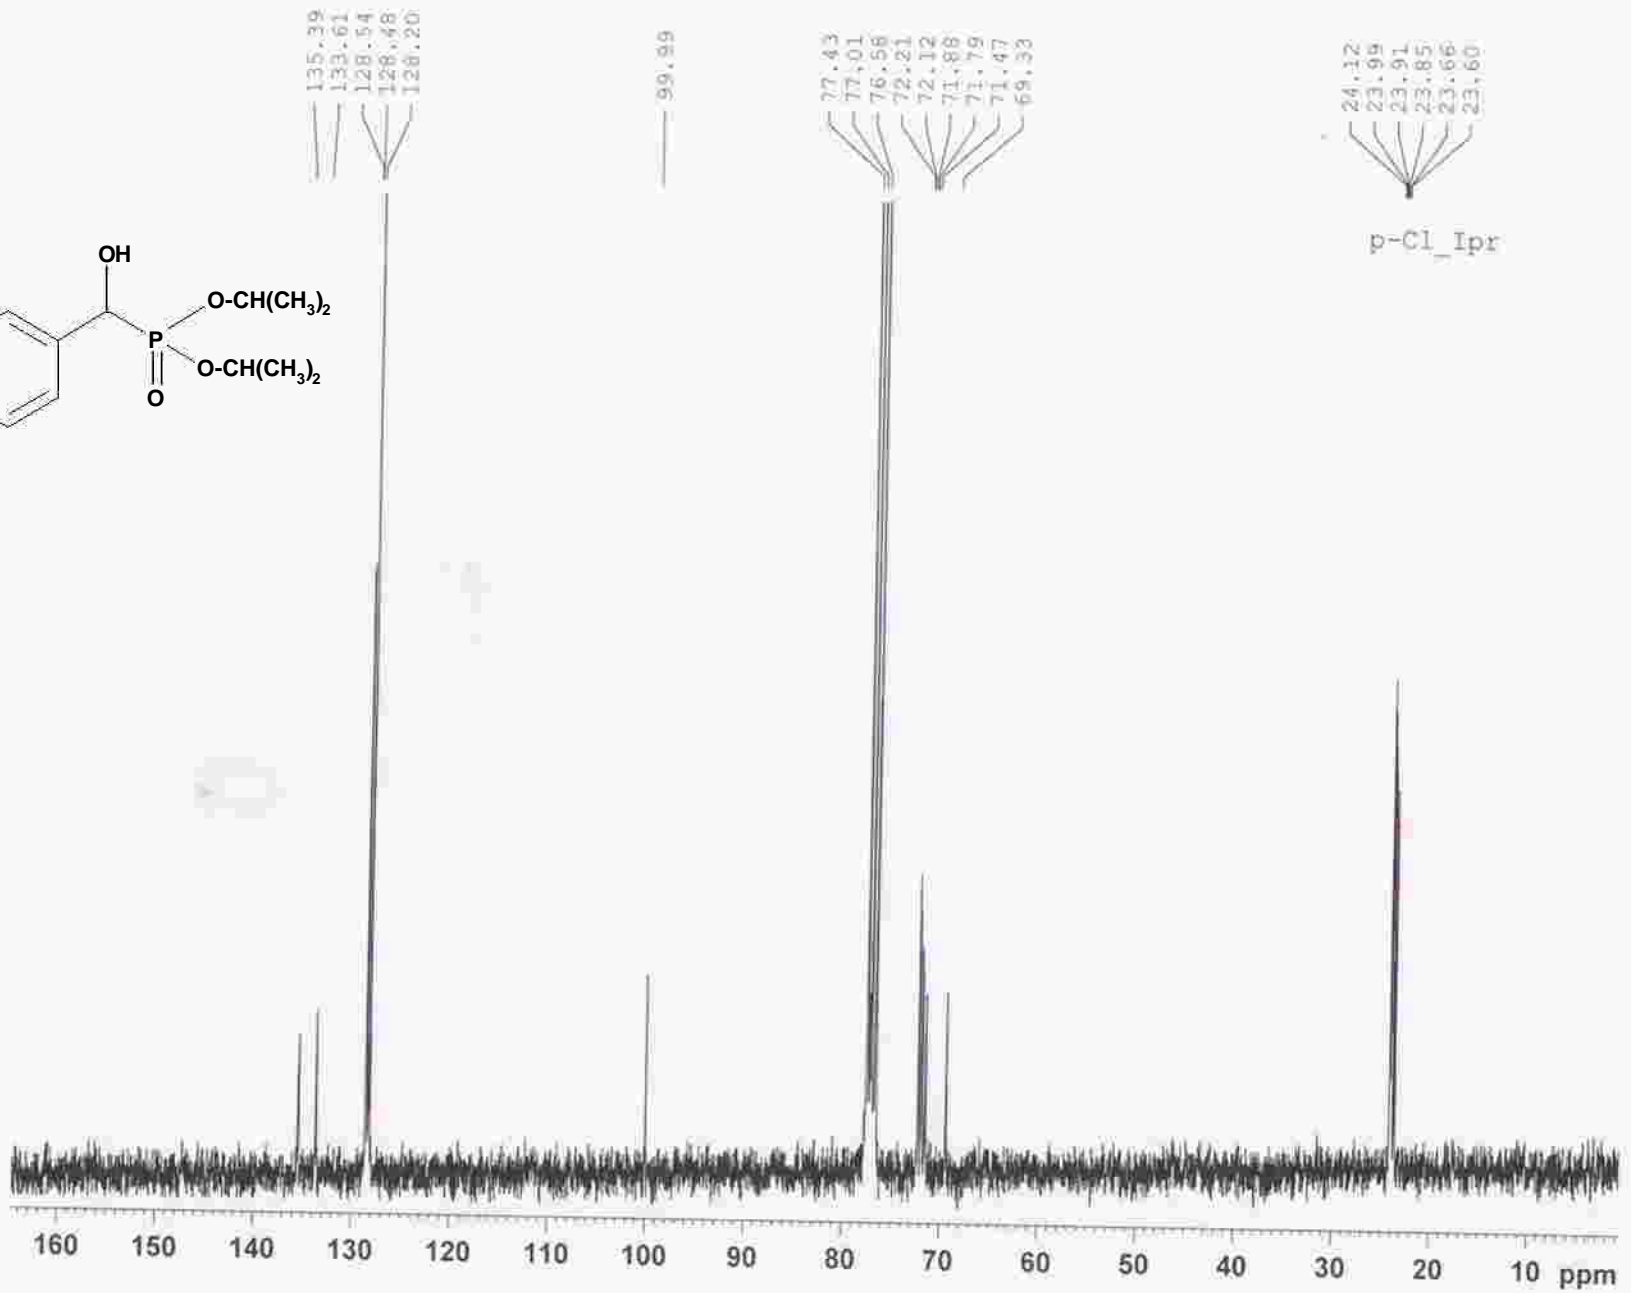

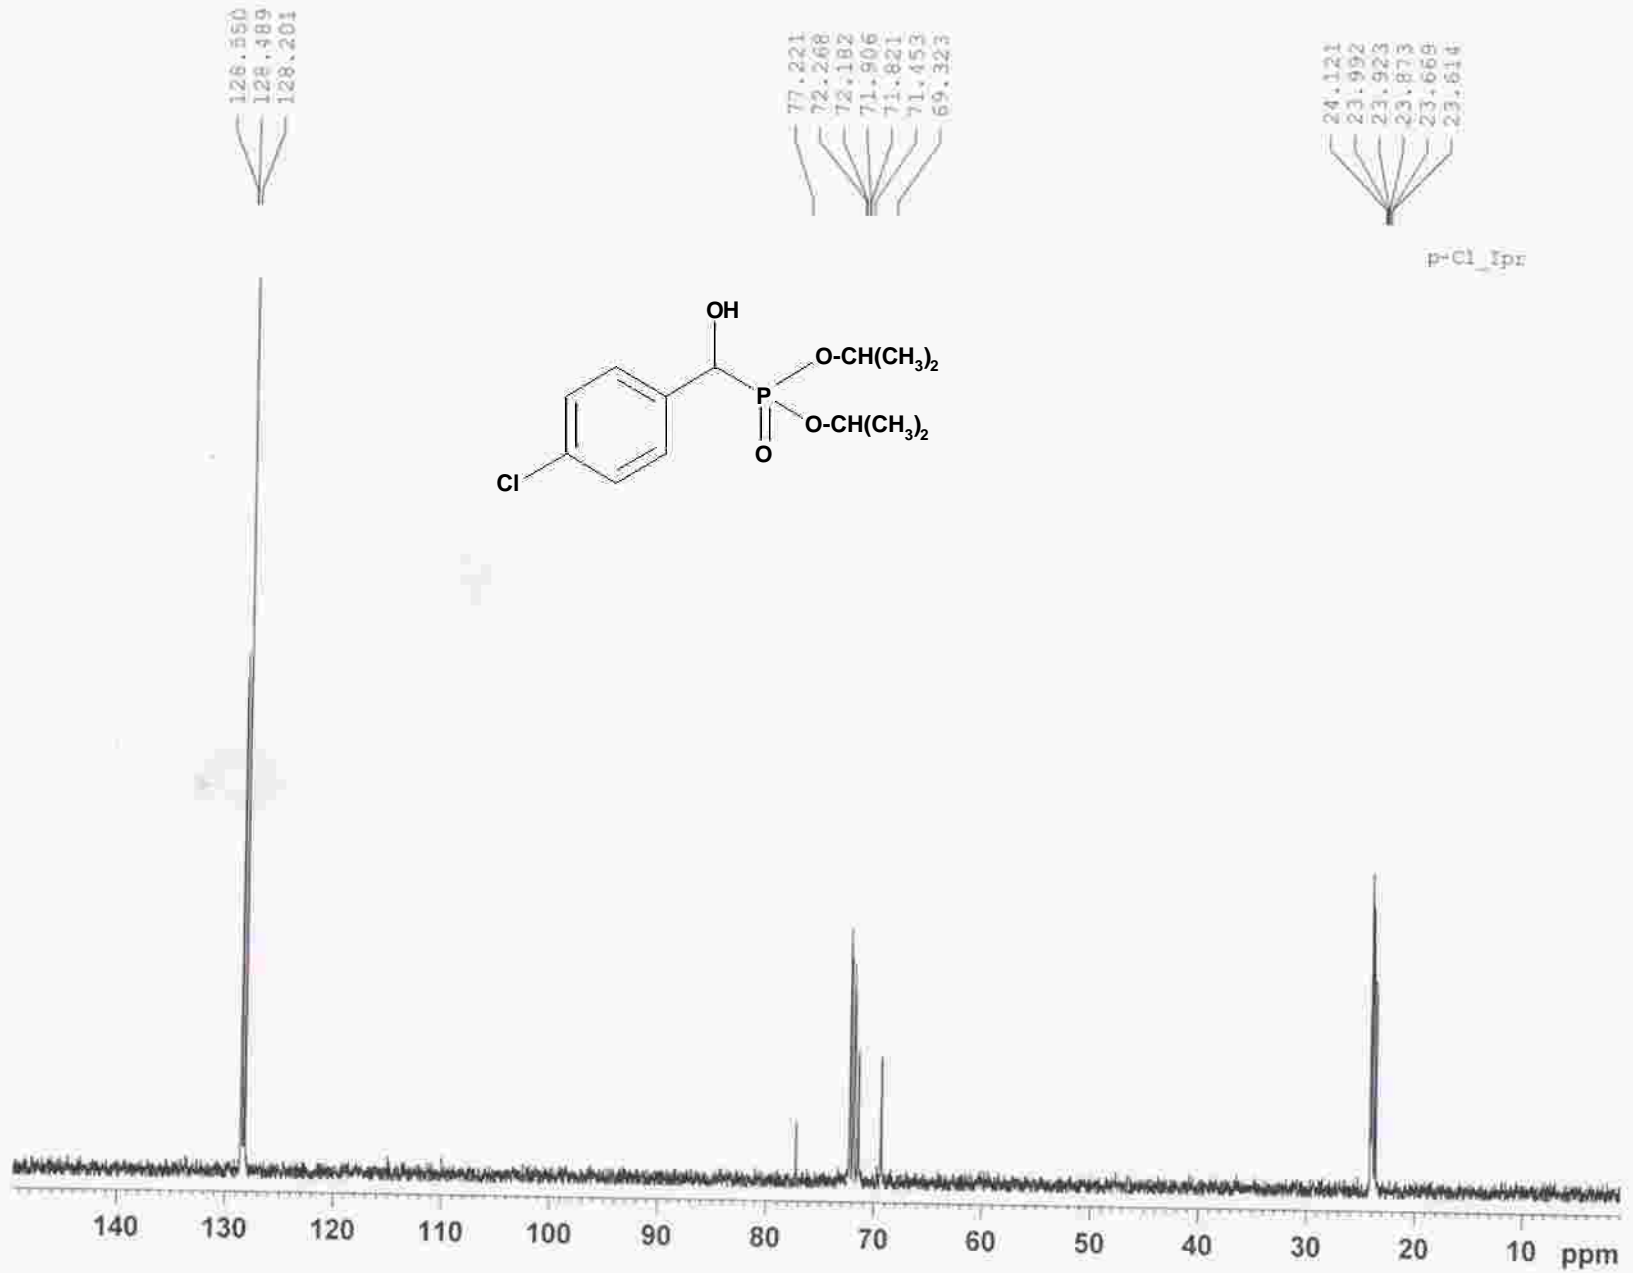



a=3.31839173977164490e-004; t0=-3.49418653411422530e+001

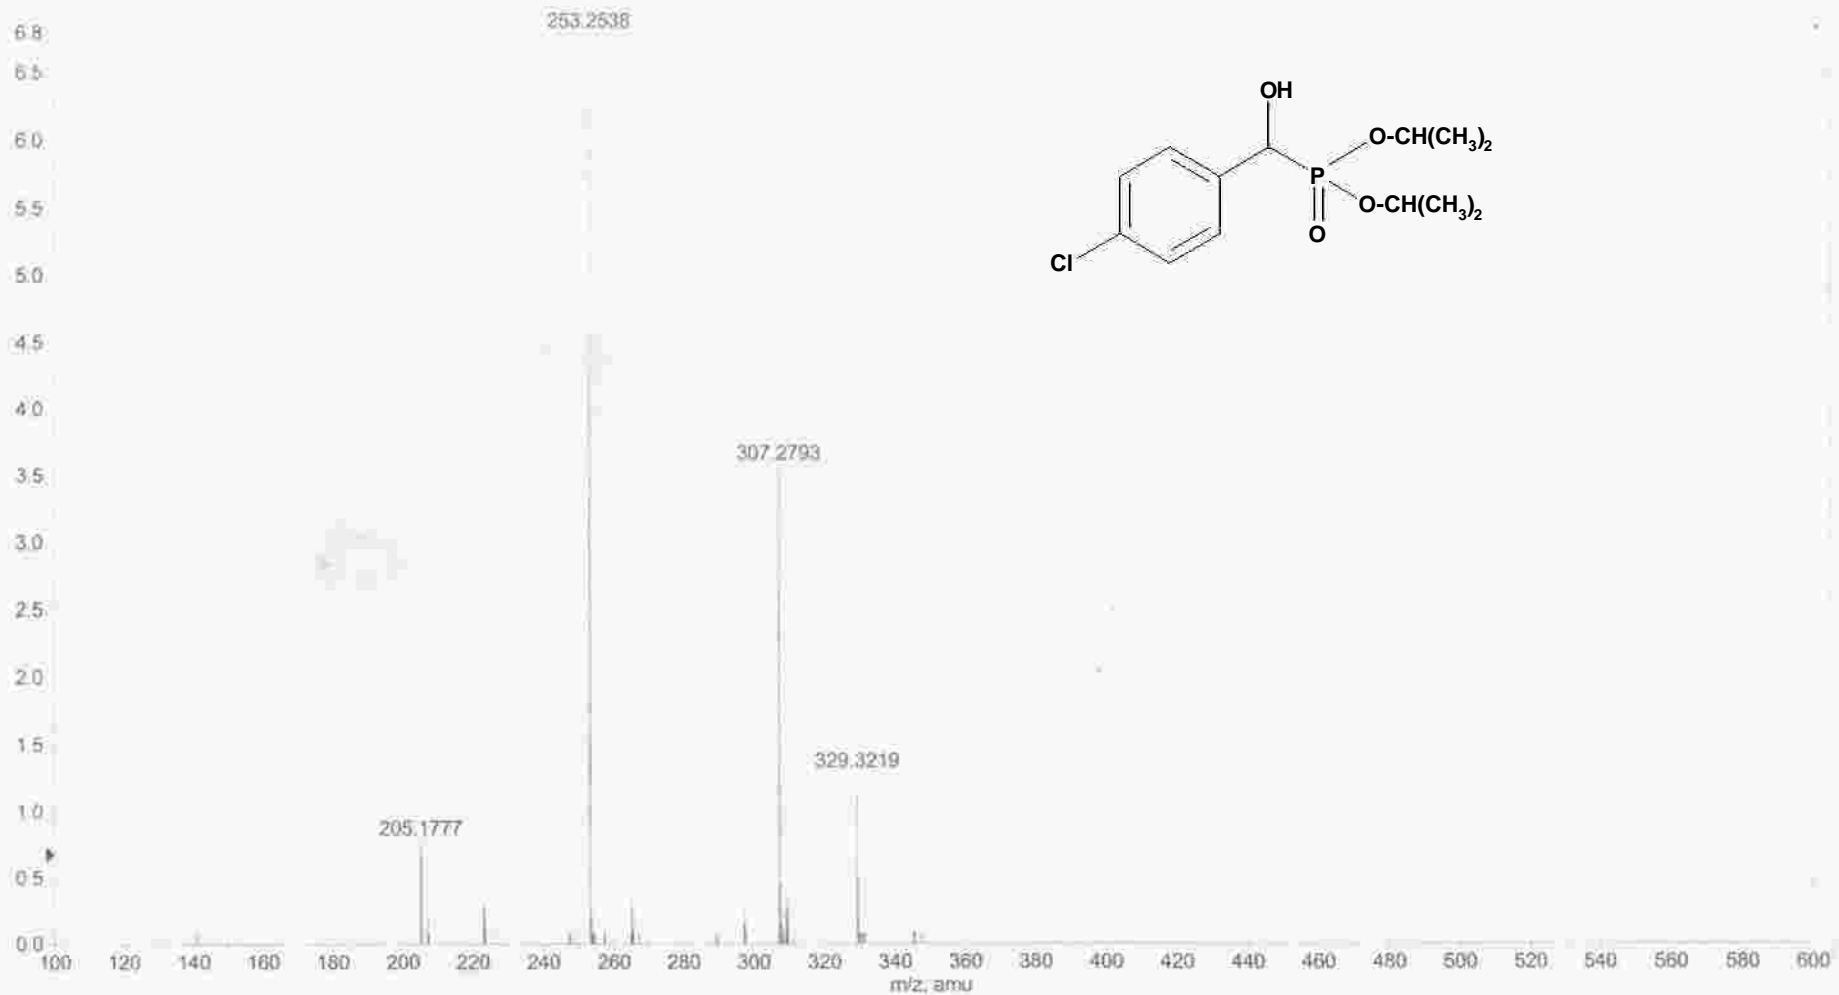

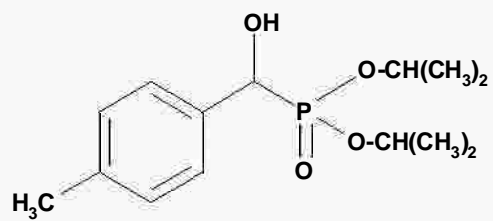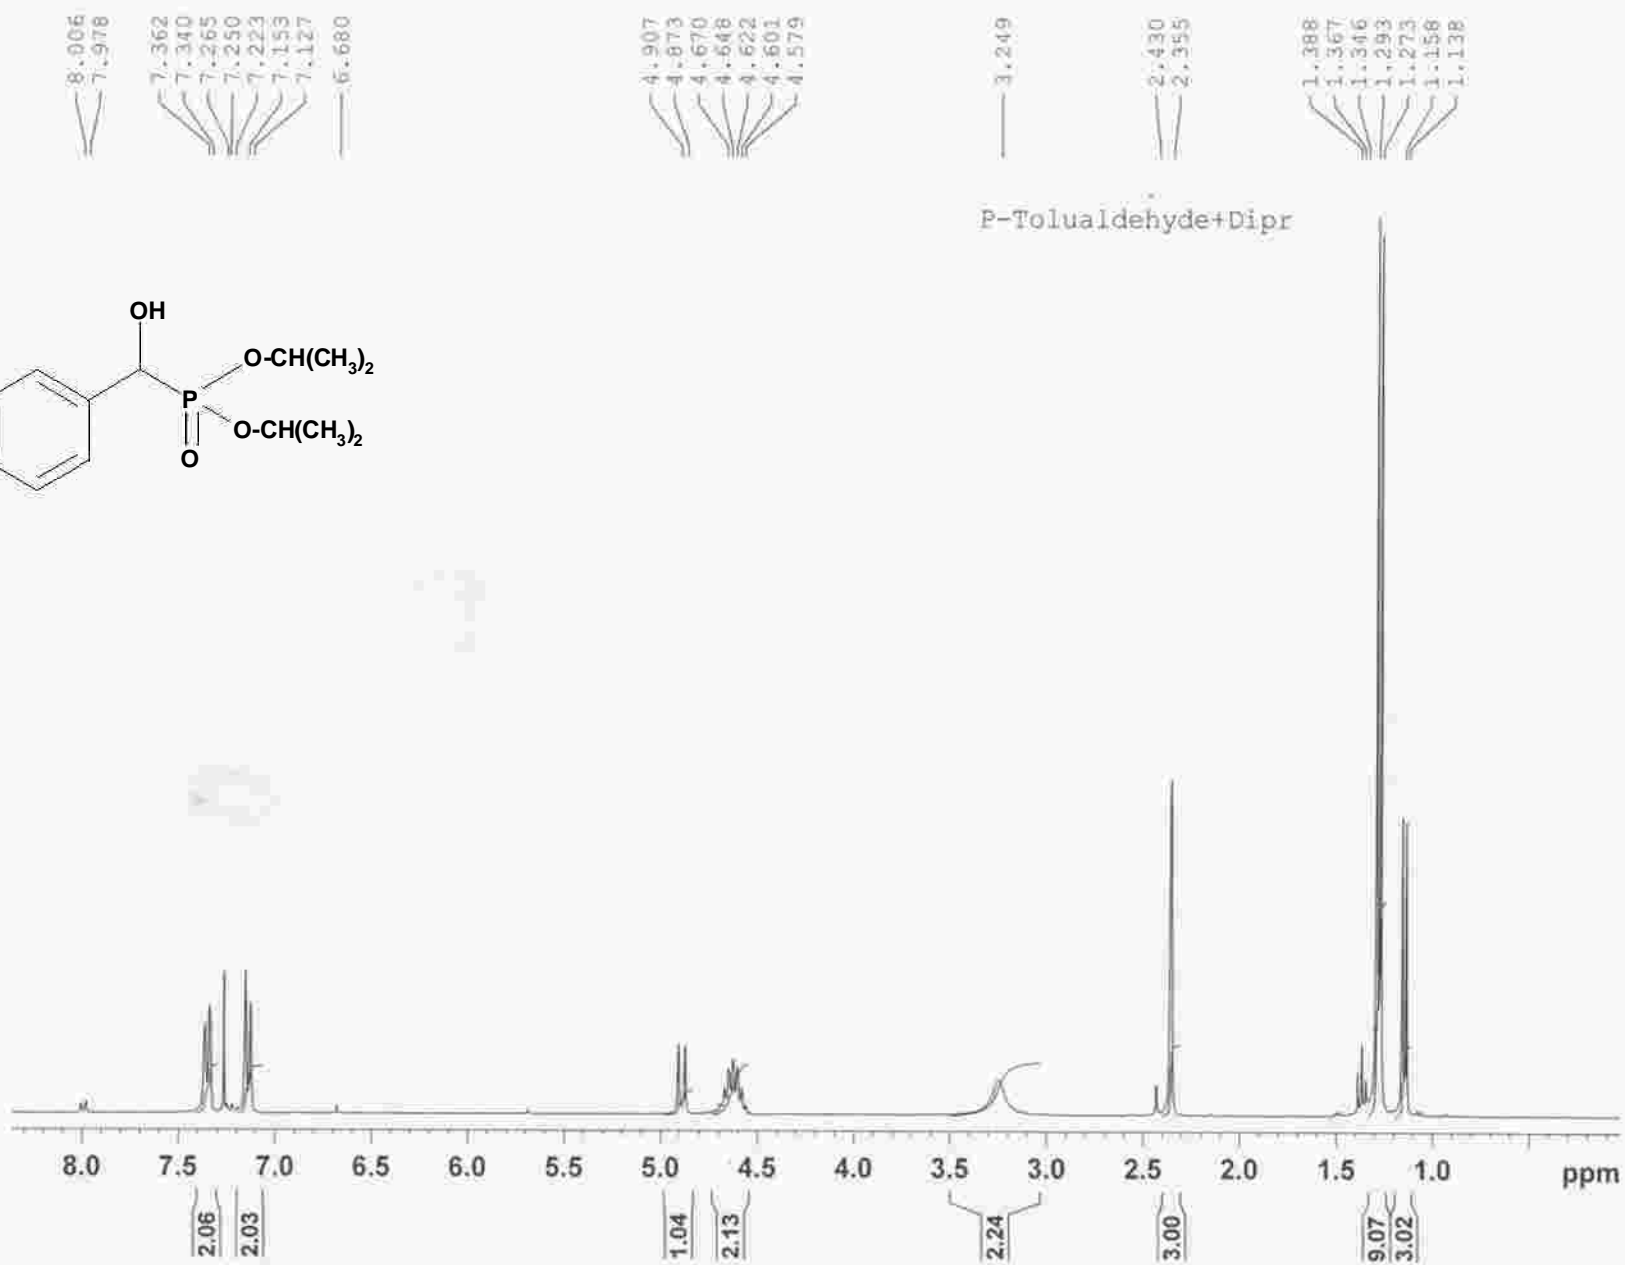

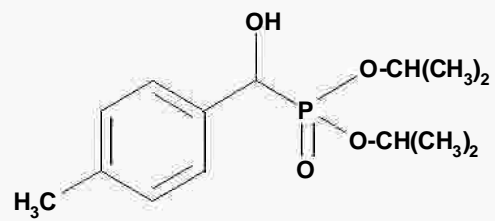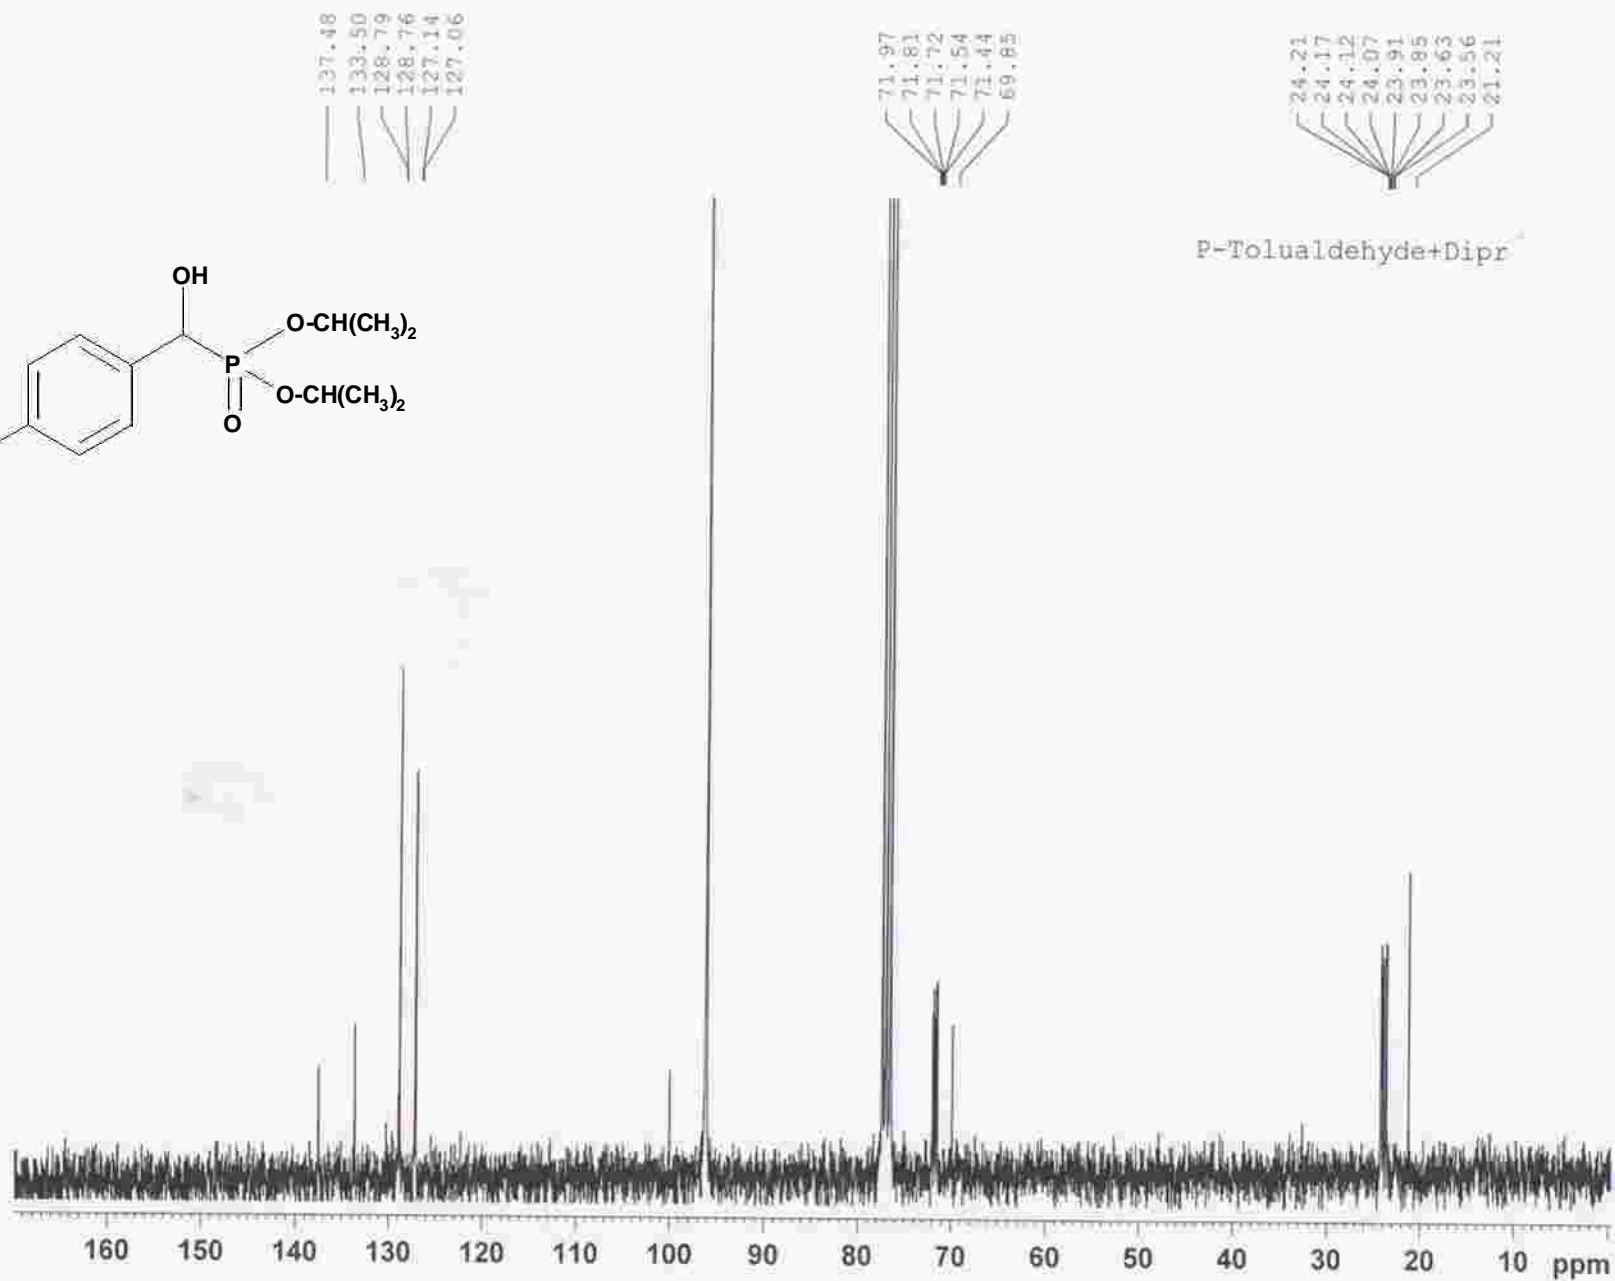

P-Tolualdehyde+Dipr

+TOF MS: 0.033 to 1.200 min from P-TOLDIHYDE-IPR.wiff  
a=3.37719425928799980e-004, 10=-3.54887063182468410e+001 R;

Max. 107.8 counts

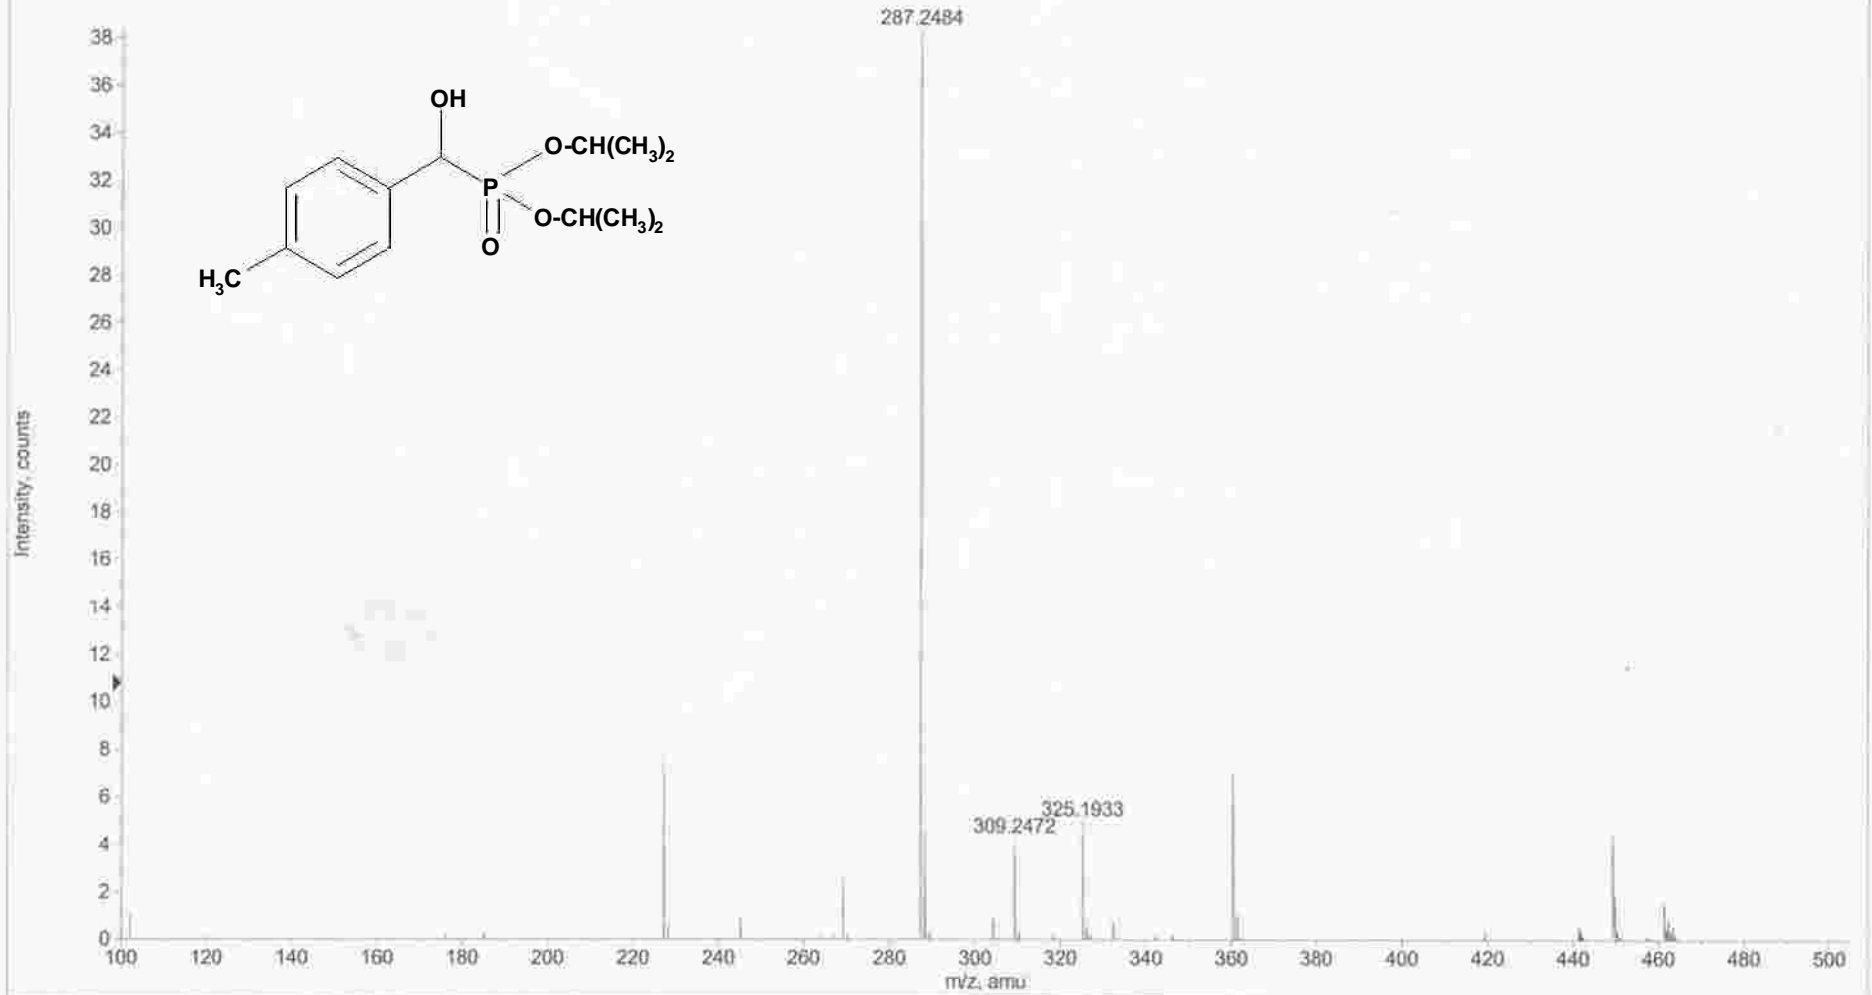

Dept of Chemistry, Shivaji University, Kolhapur

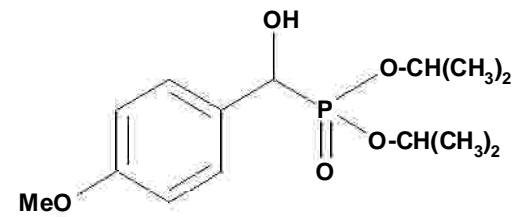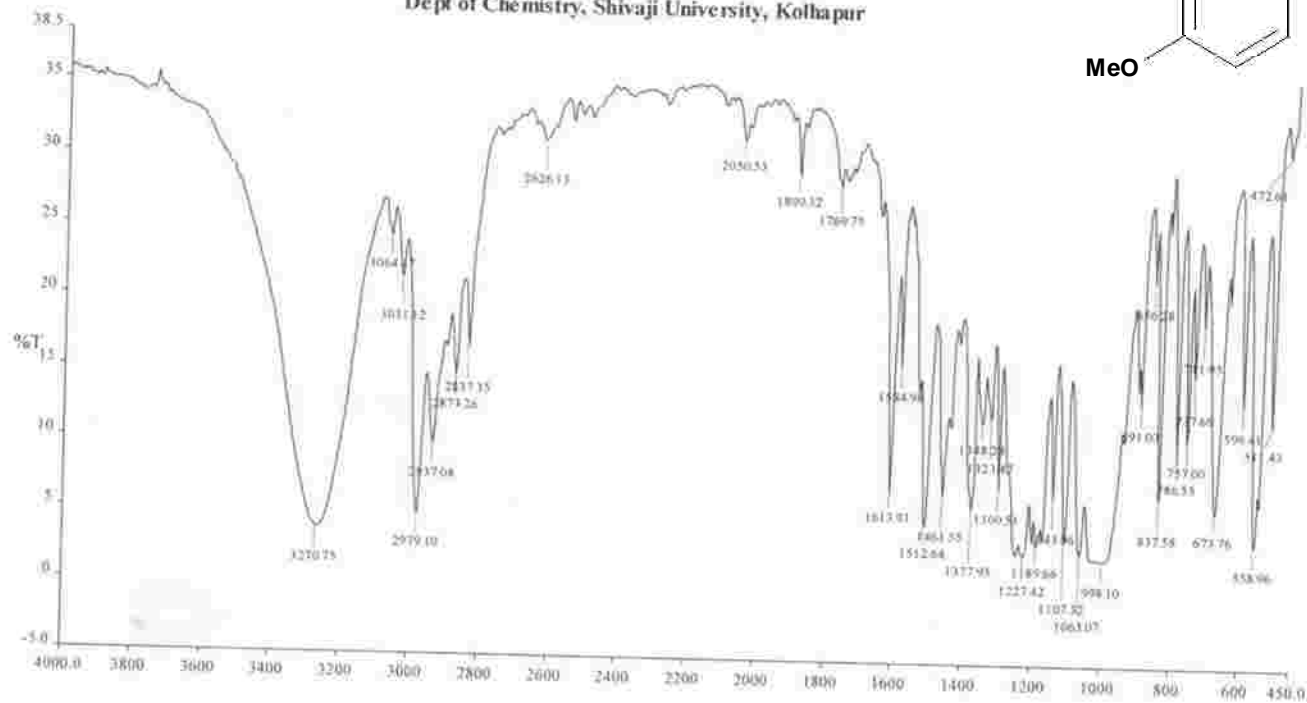

INSTRUMENT MODEL: PERKIN ELMER SPECTRUM 100.

Instrument Serial Number: 79720.

lpr-7.002 - 23-09-10.

Date Created: 23 September, 2010 5:46 PM India Standard Time

ANALY 7:

**cm-1**

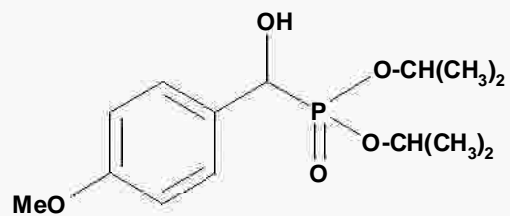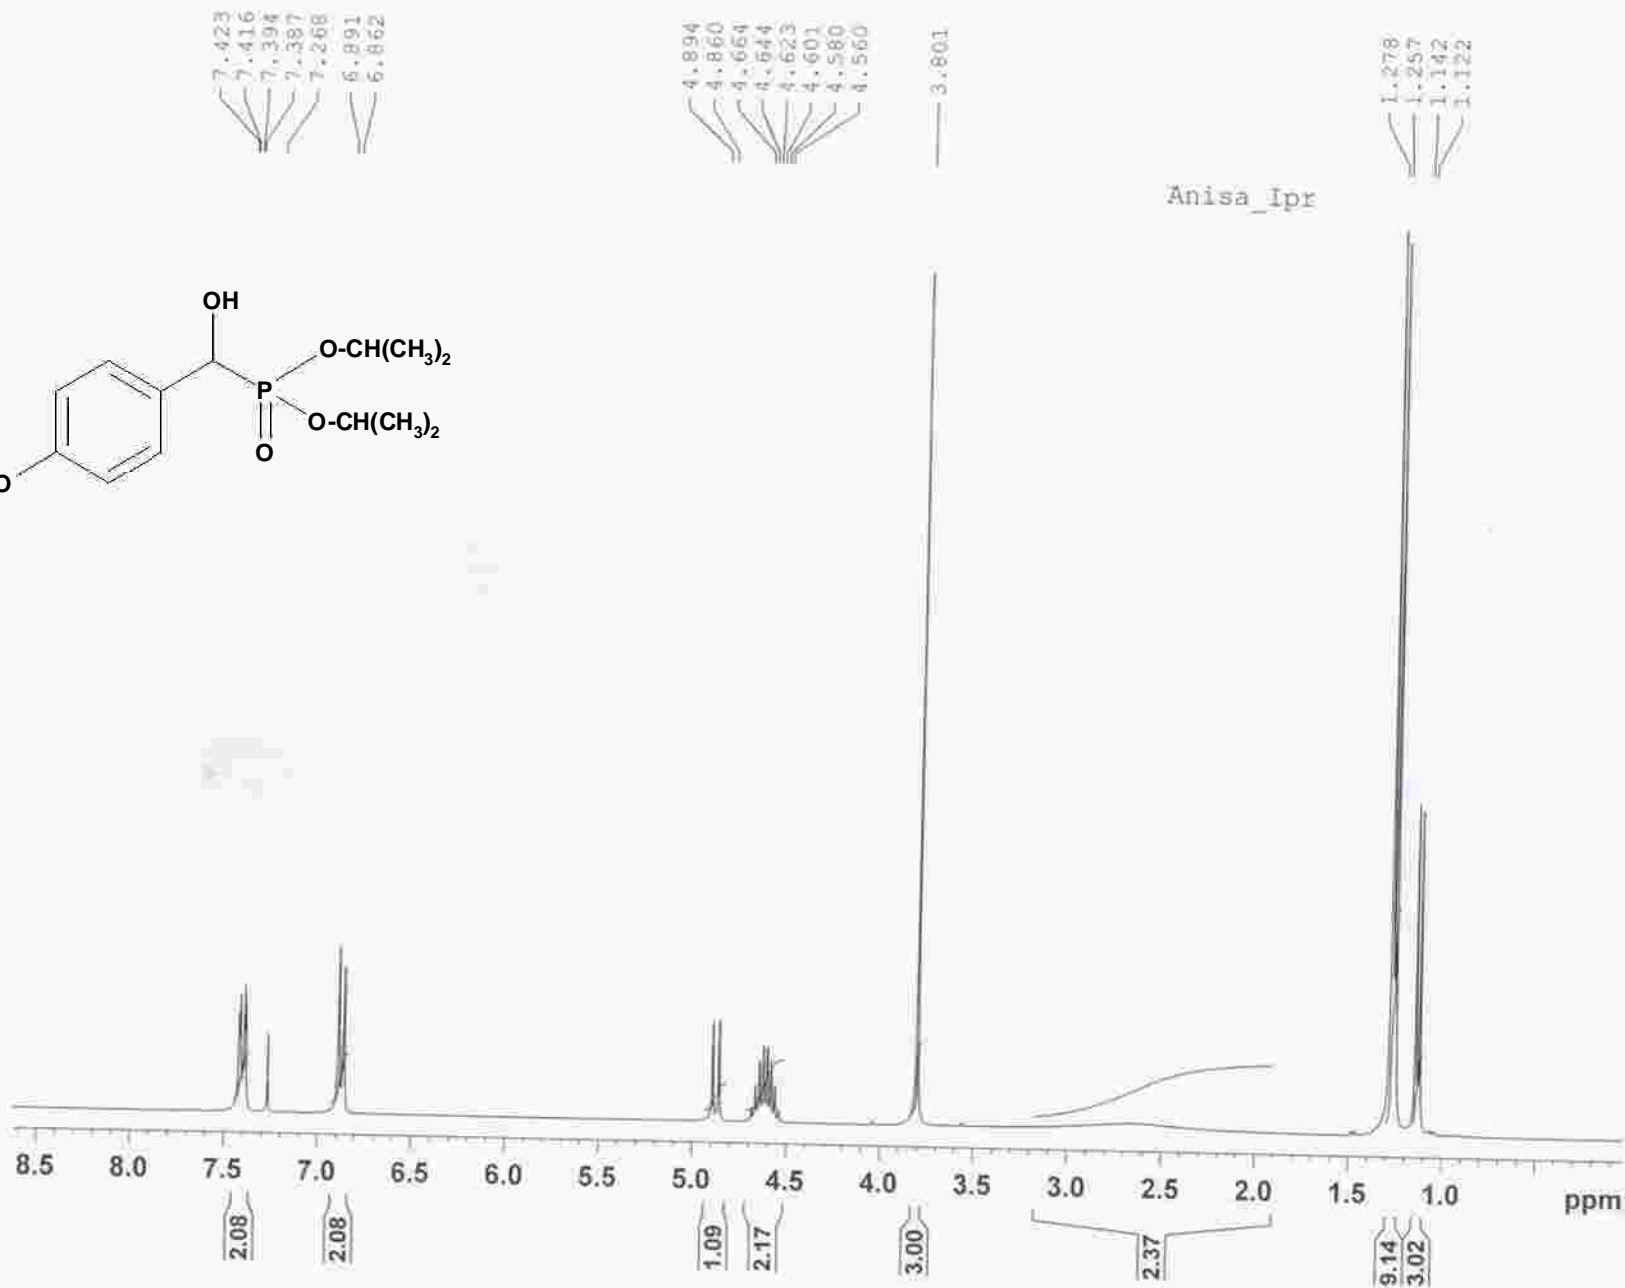

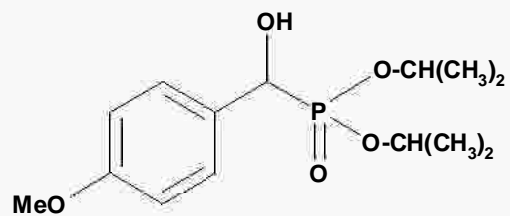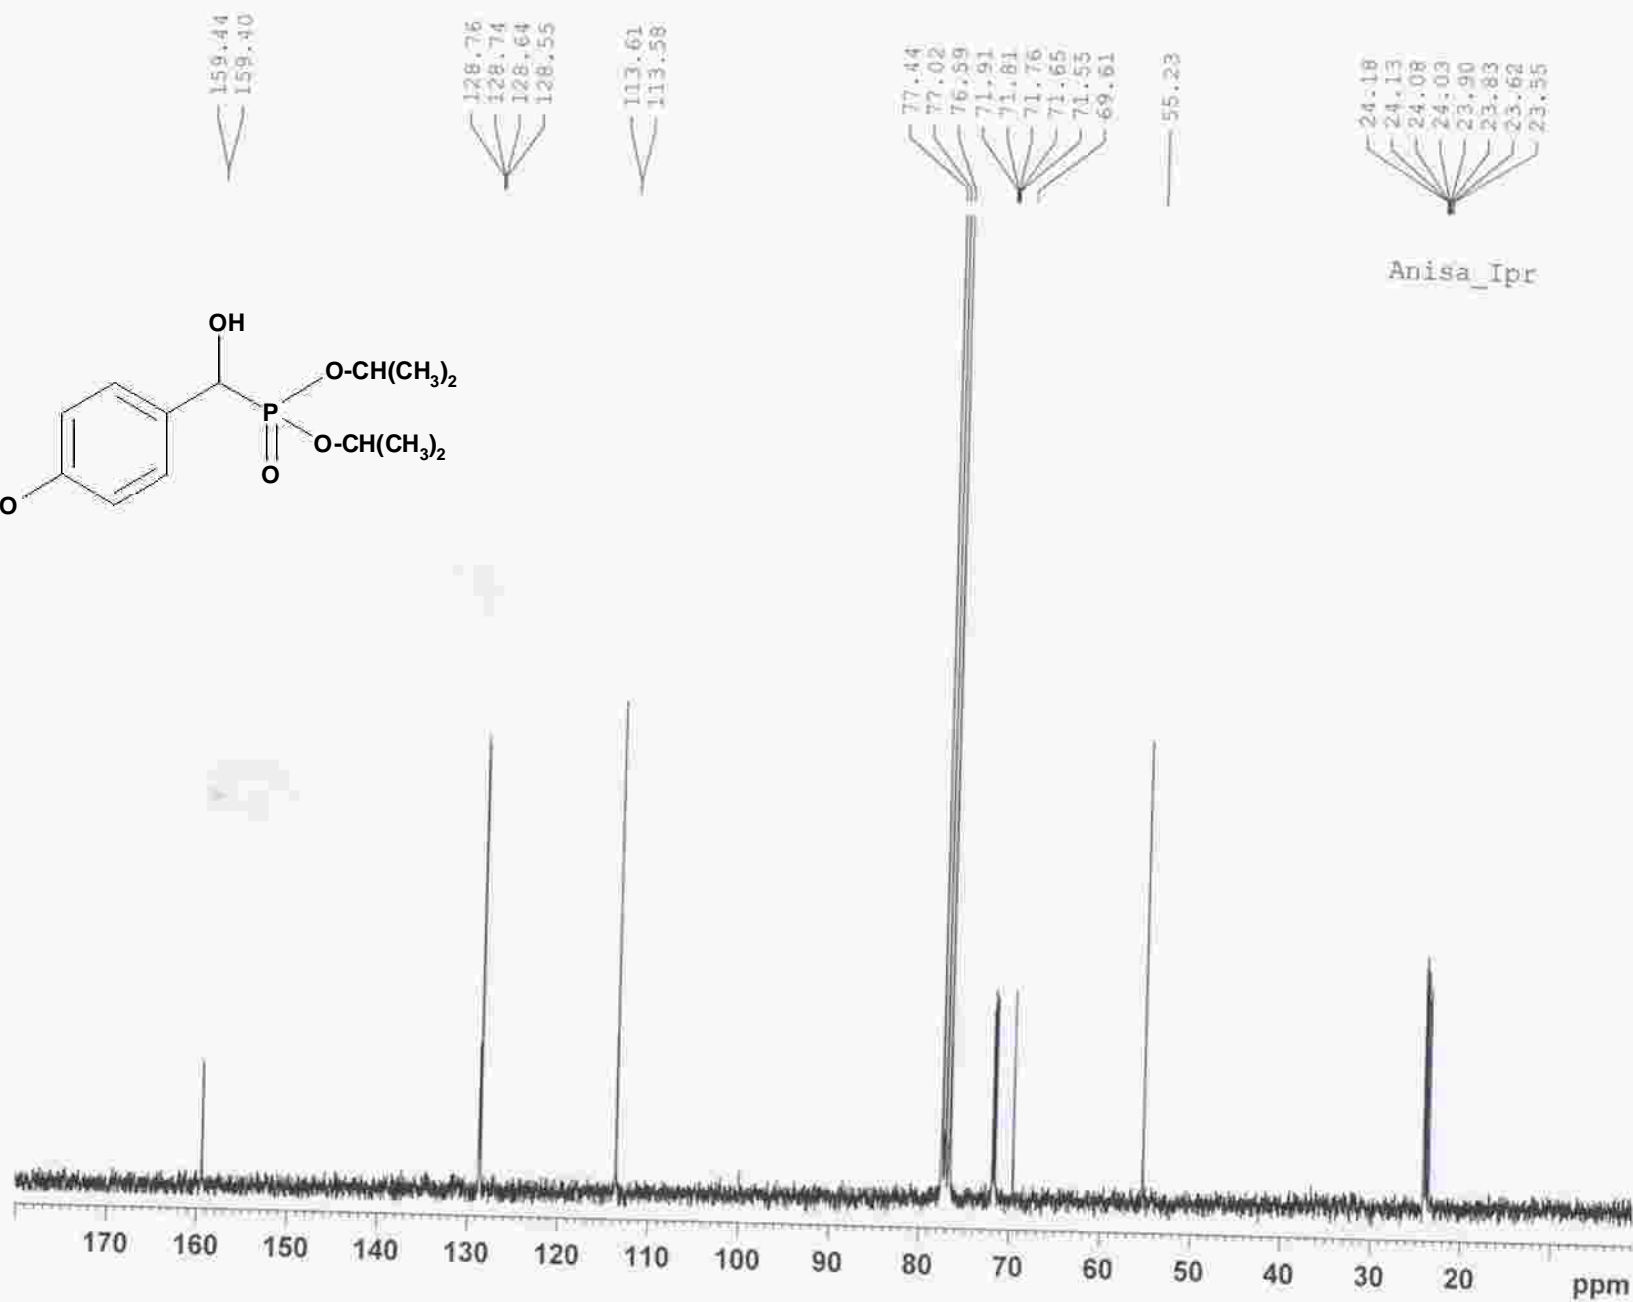

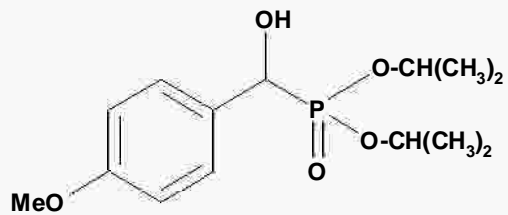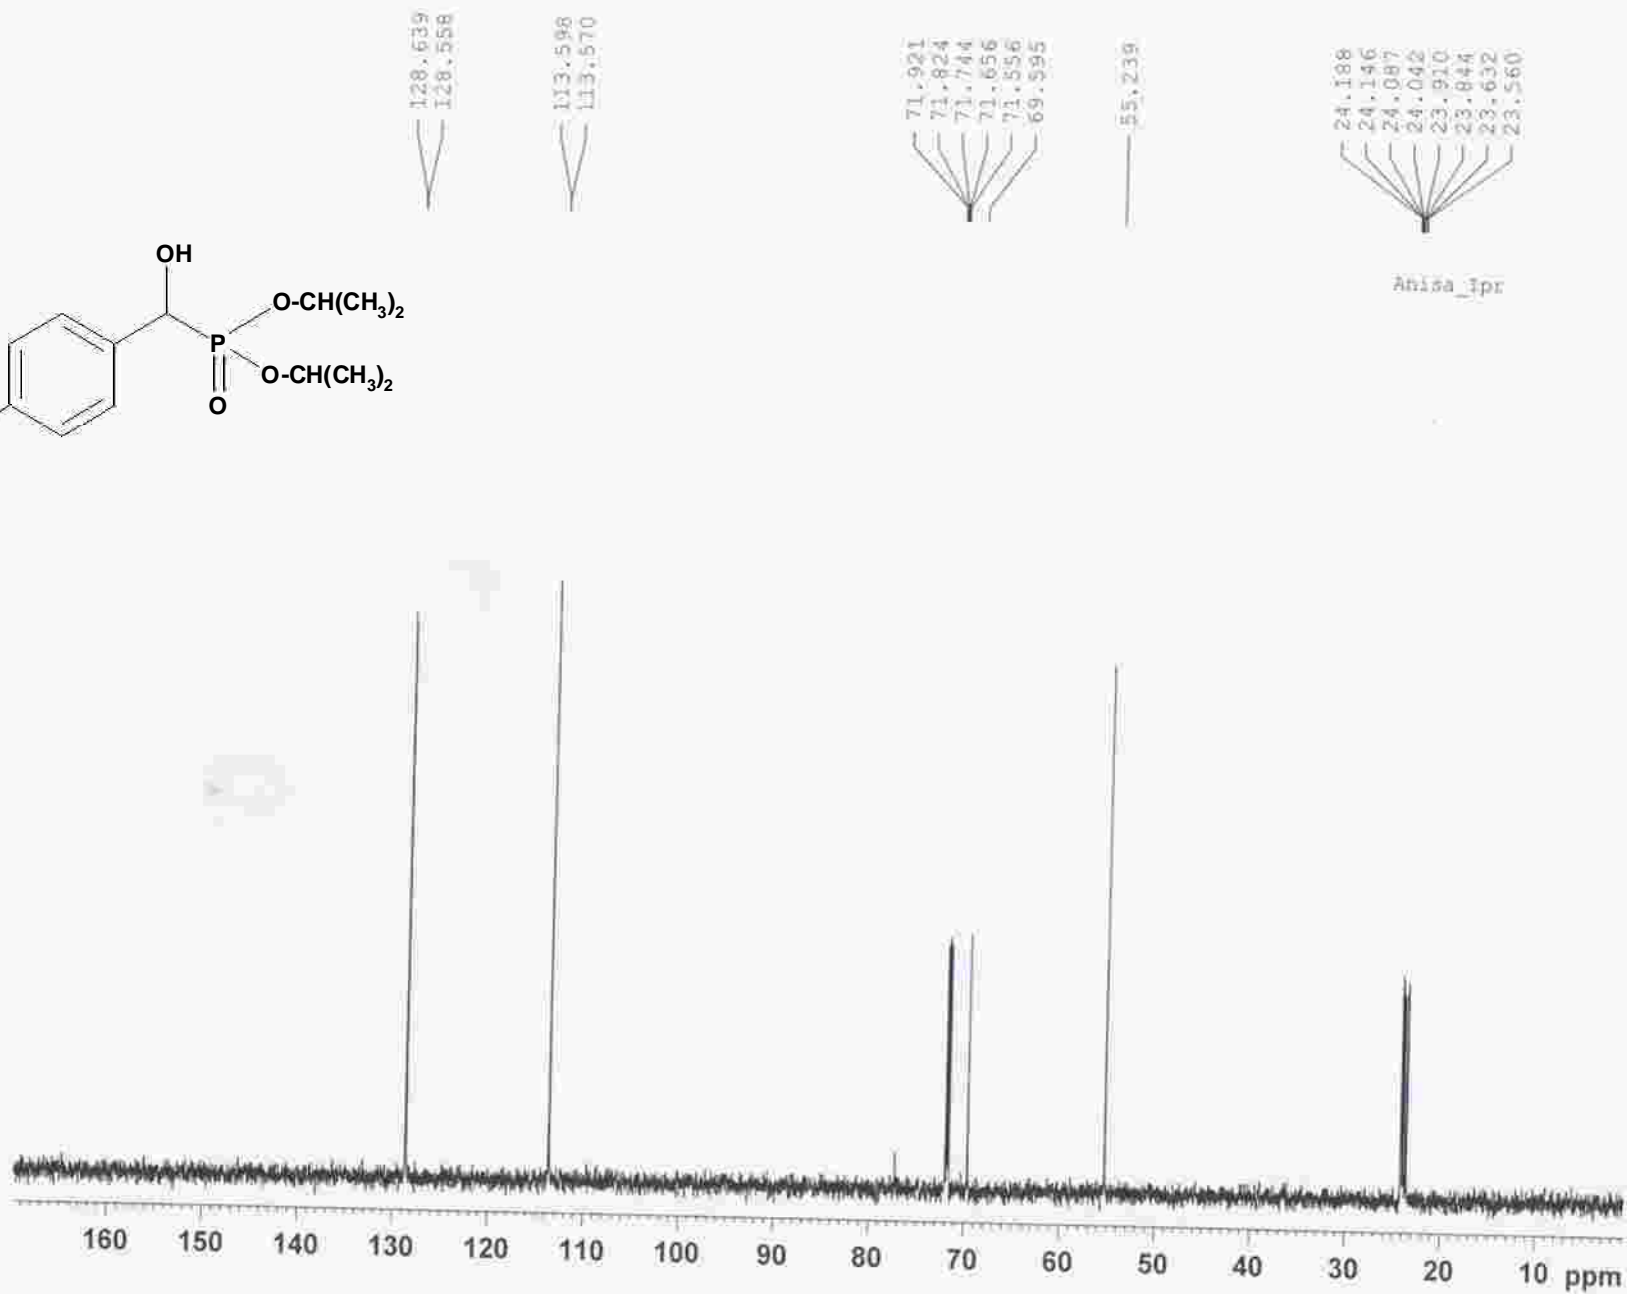



Hydrolysis of PPR-7

Pr-7

+TOF MS: 0.050 to 0.300 min from IPR-7 wiff  
a=3.31839173977164490e-004, t0=3.49418683411422530e+001

Max. 42.1 counts

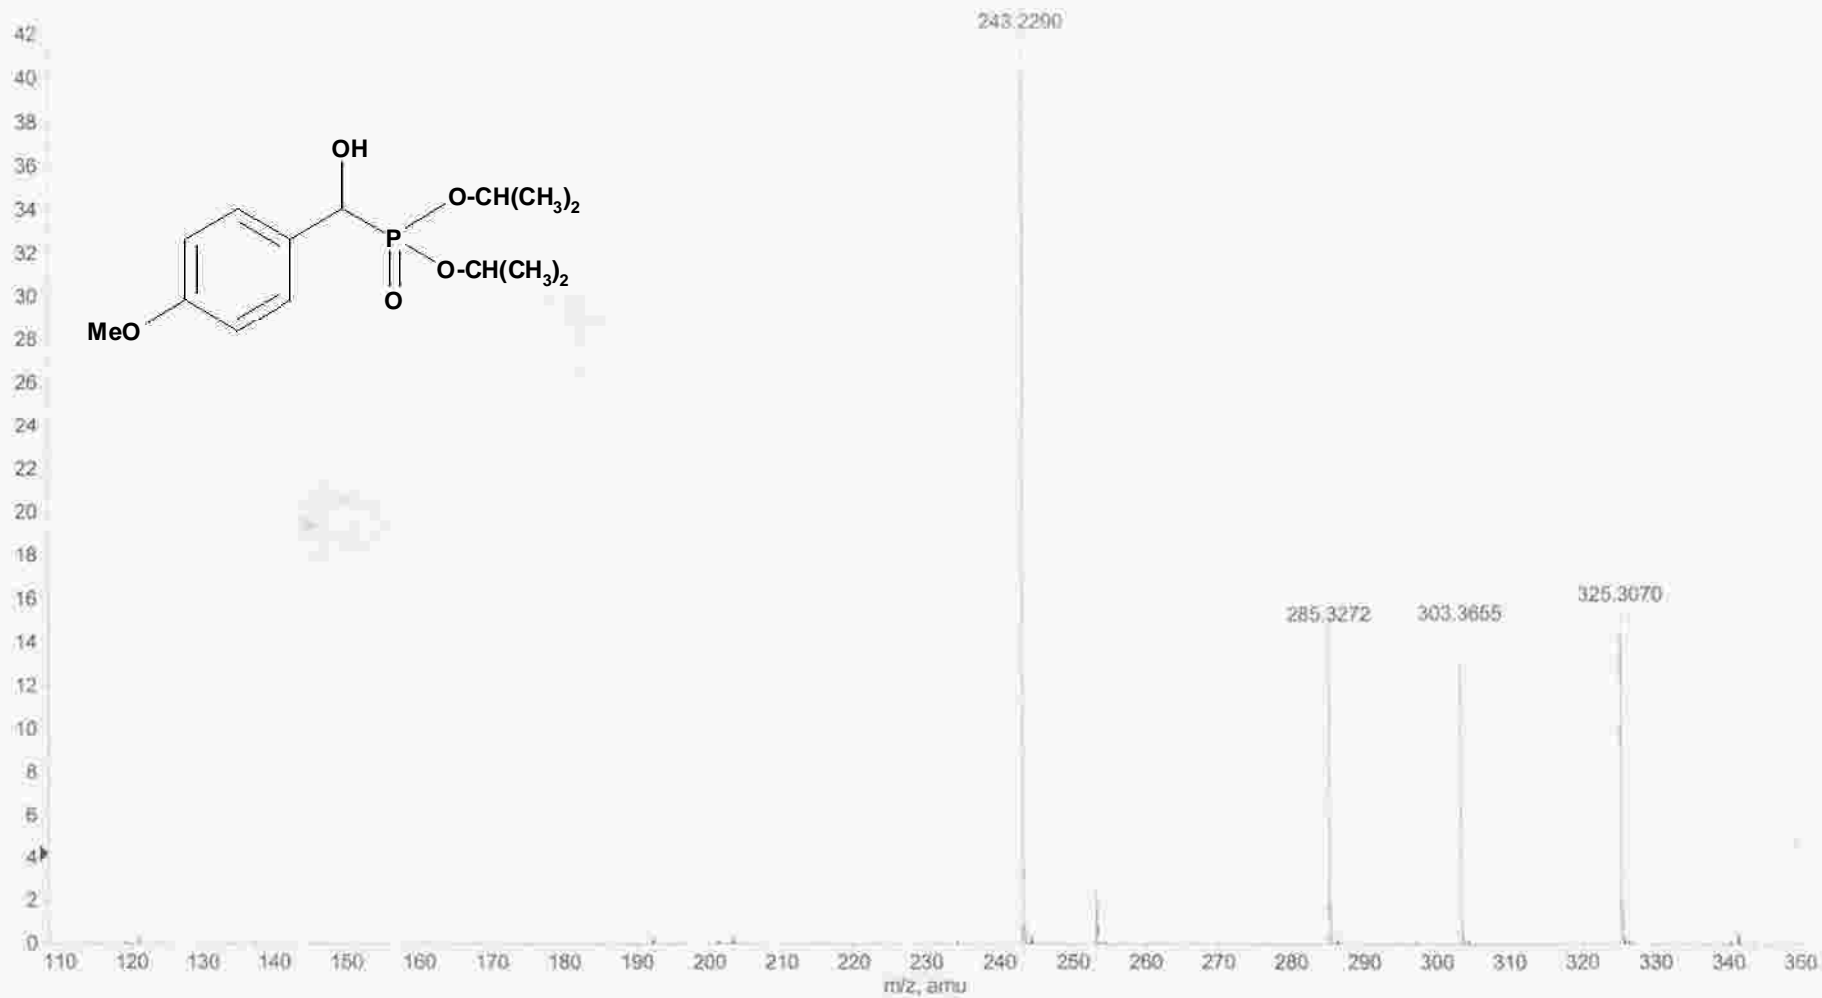

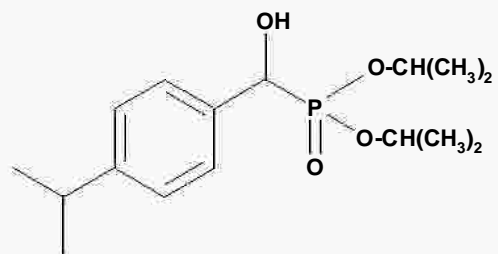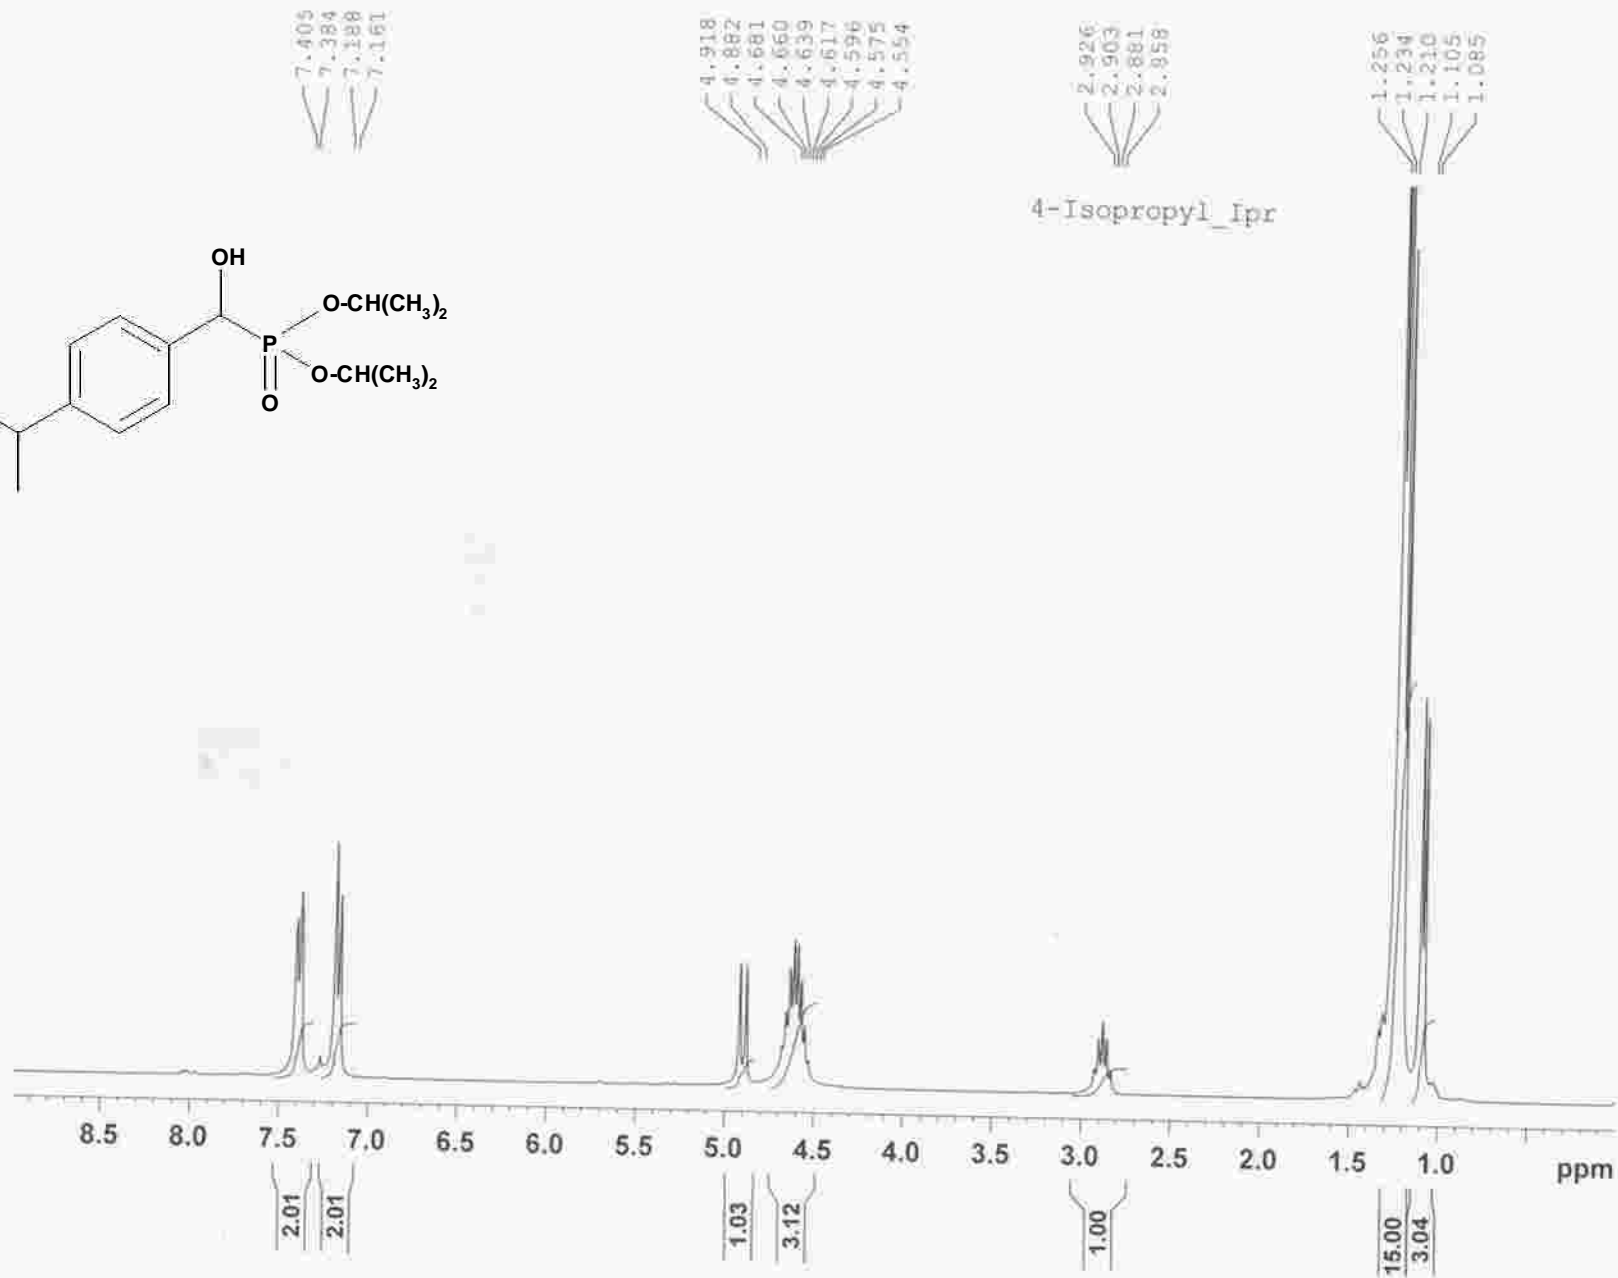

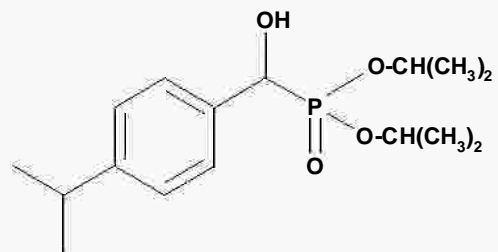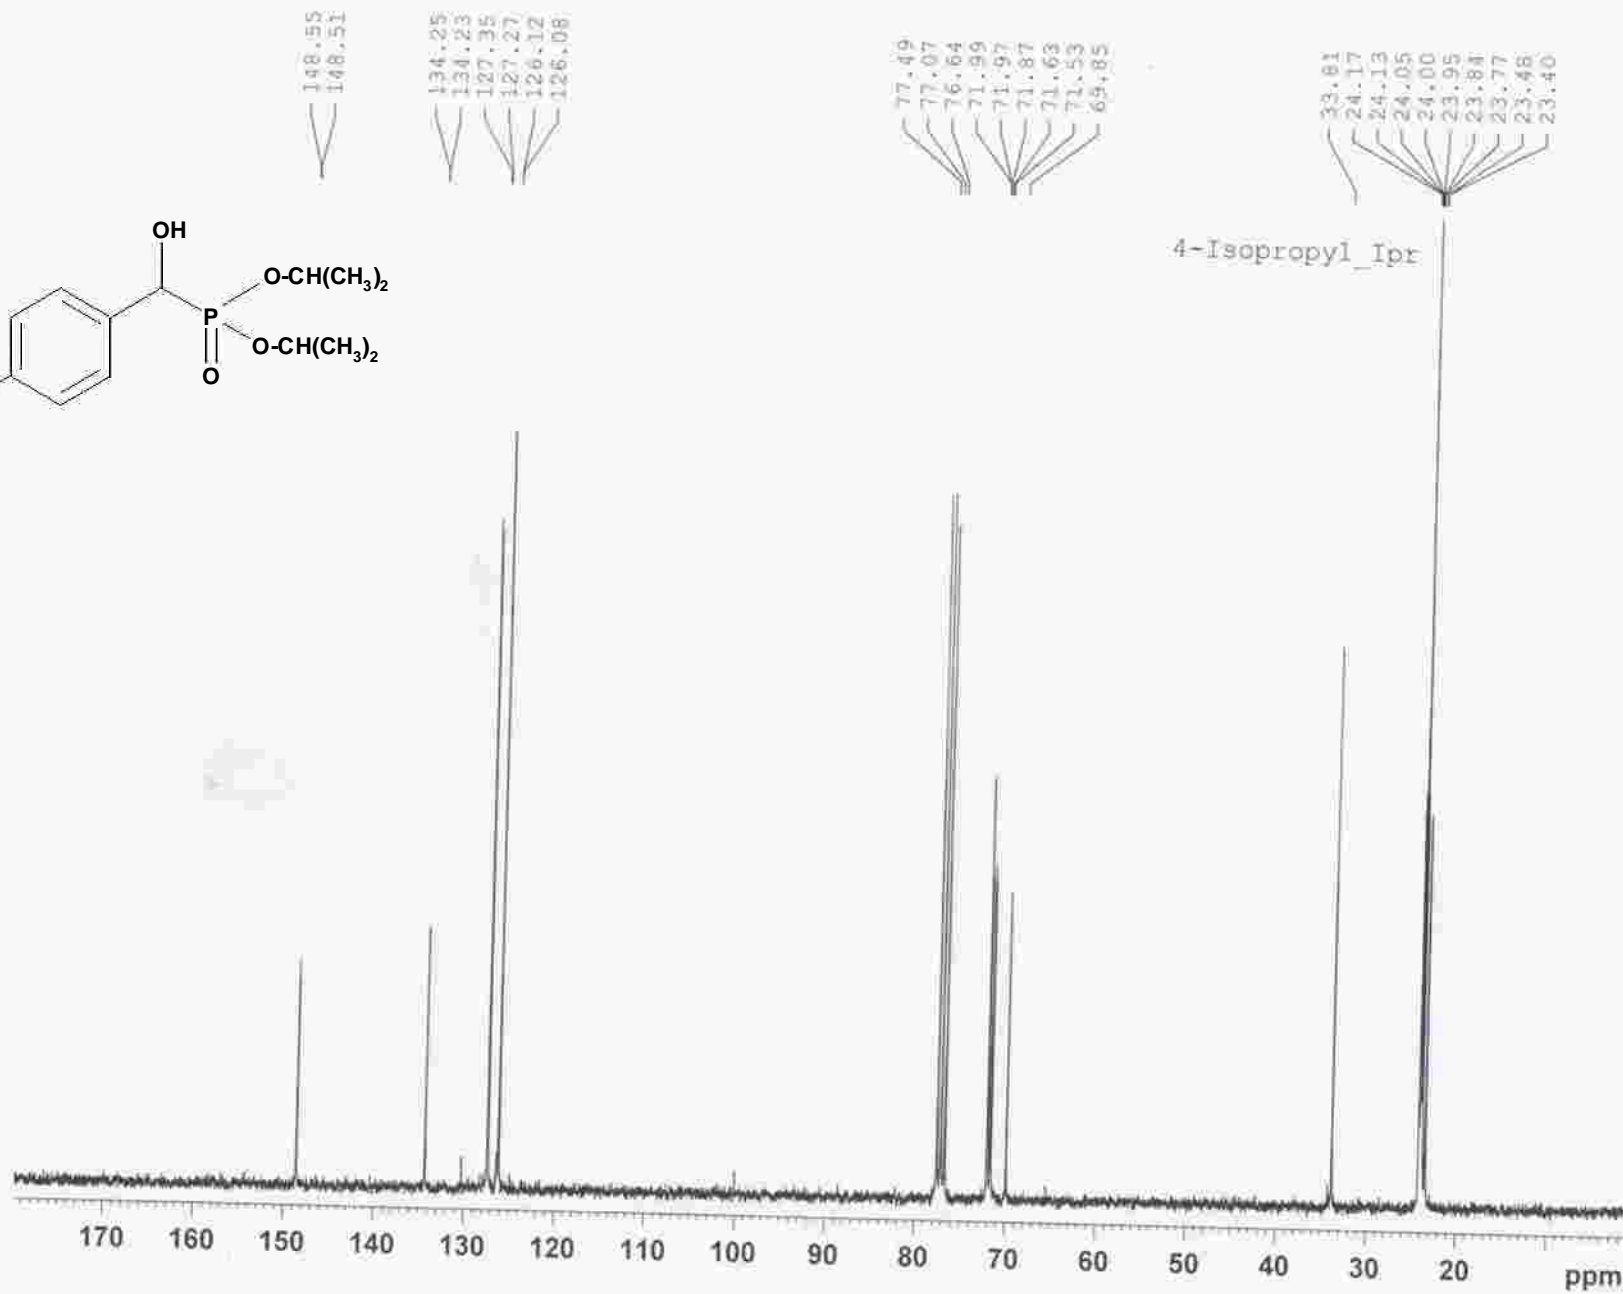

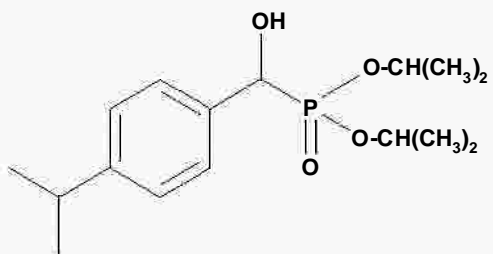

127.350  
127.270  
126.122  
126.092

71.982  
71.889  
71.639  
71.539  
69.839

33.812  
24.185  
24.146  
24.056  
24.007  
23.961  
23.850  
23.782  
23.700  
23.601  
23.480  
23.407

4-Isopropyl\_ipr

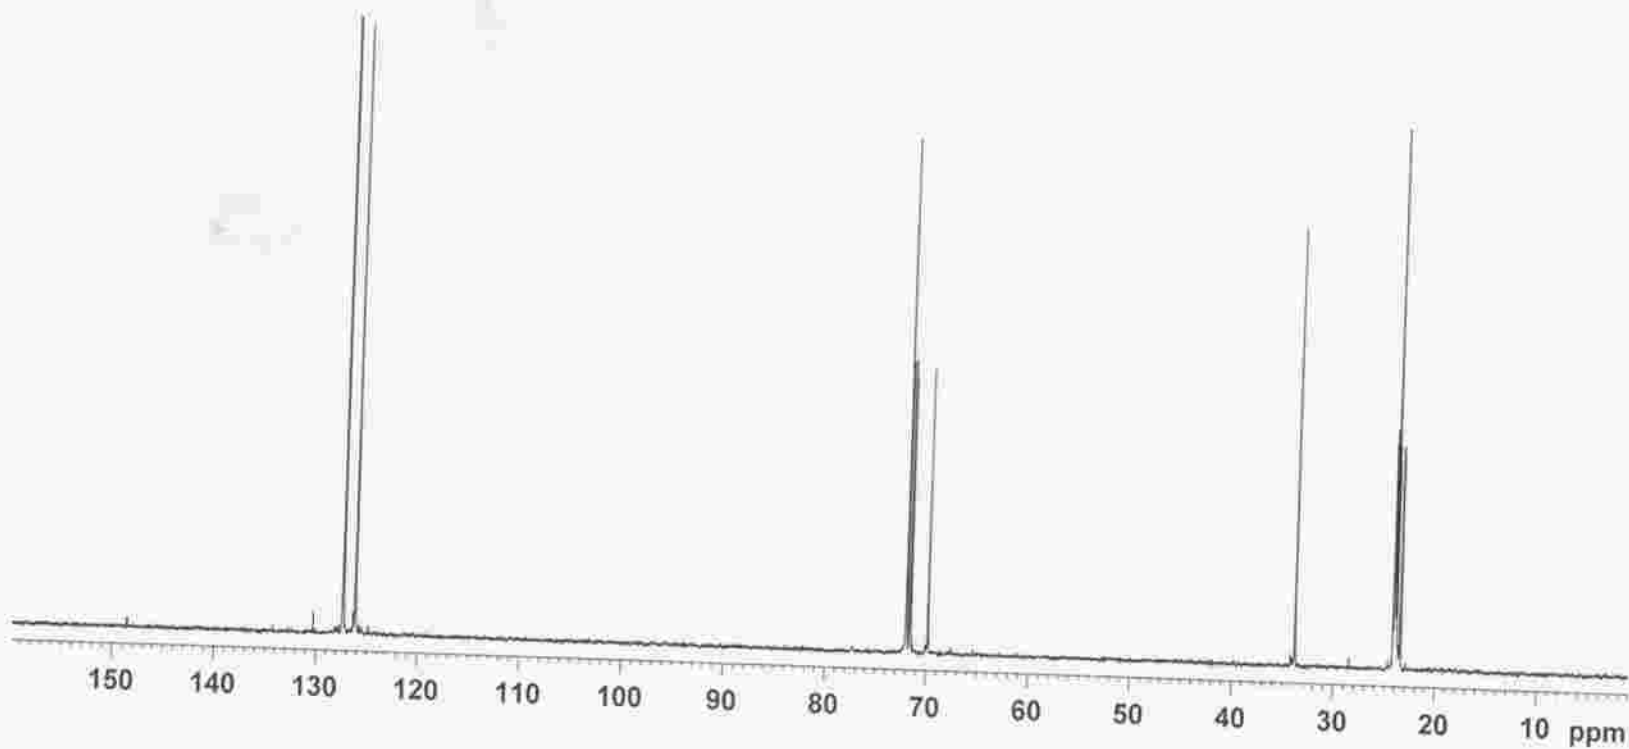

+TOF MS: 0.017 to 0.350 min from ISOPROP\_DIPR.wiff  
a=3.37719425928799980e-004, t0=-3.54887063182468410e+001

Max. 143.8 counts

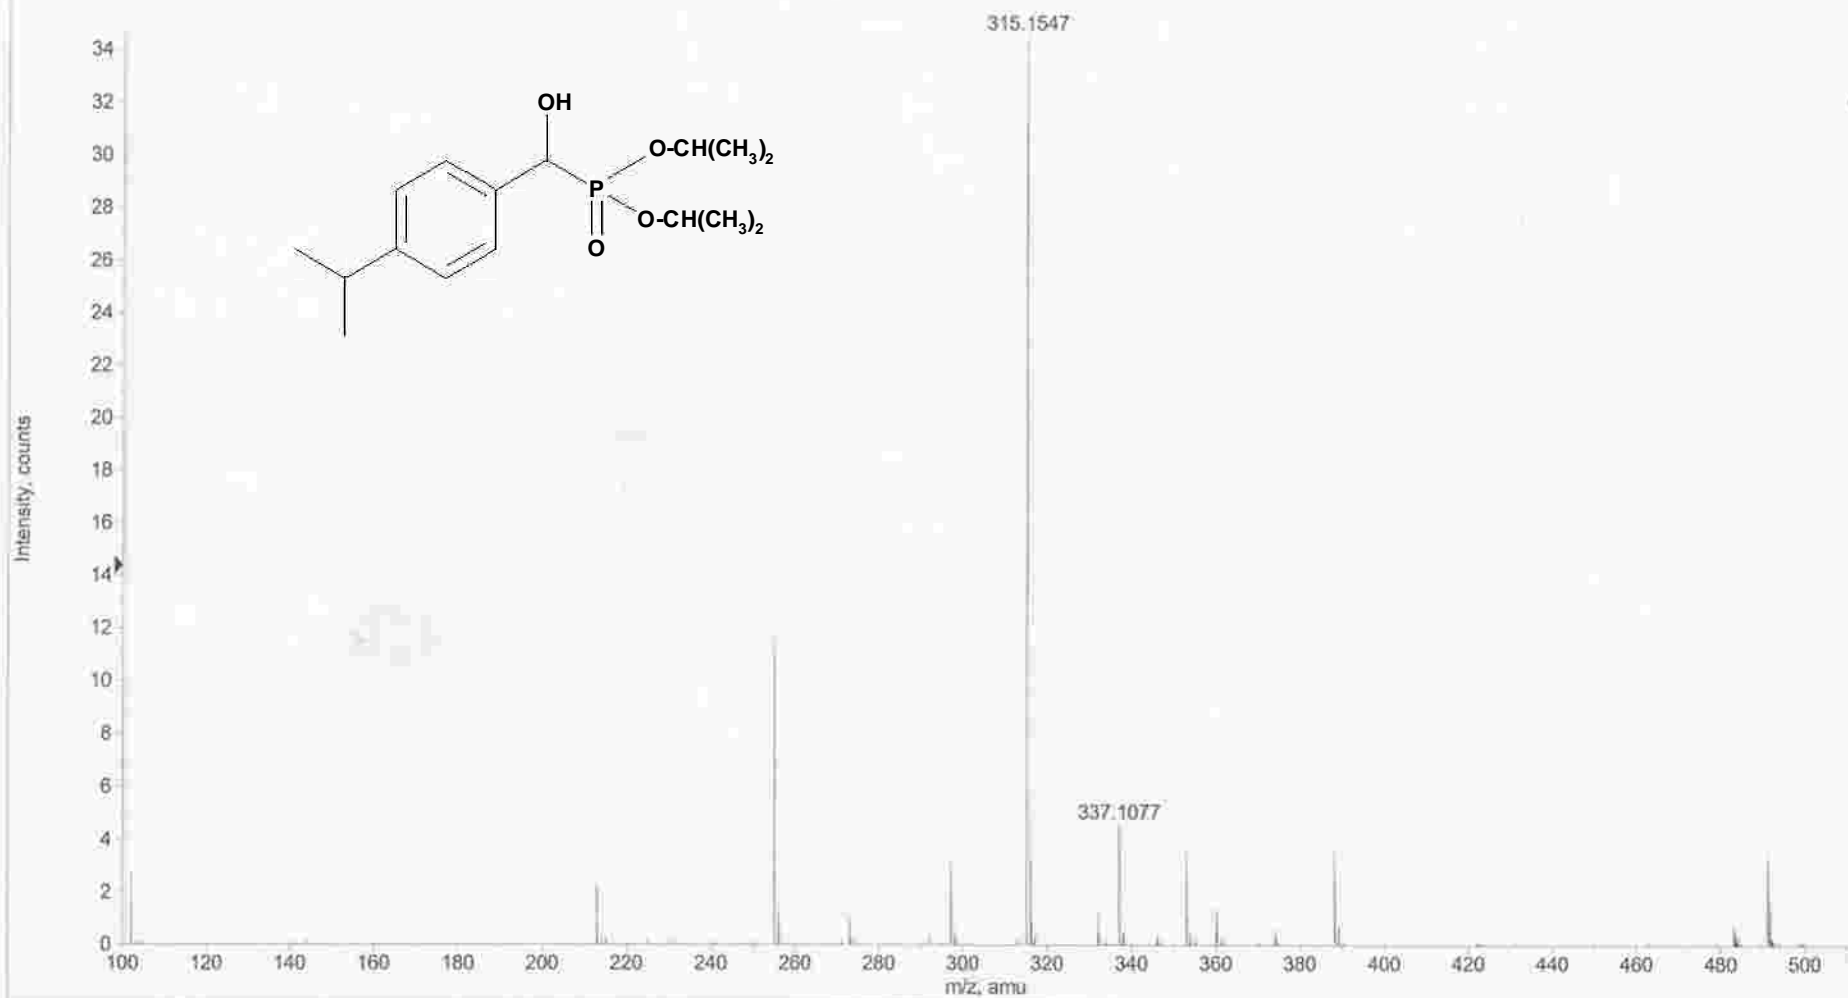

Dept of Chemistry, Shivaji University, Kolhapur

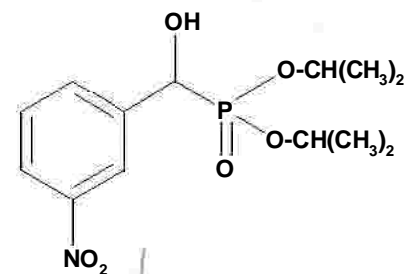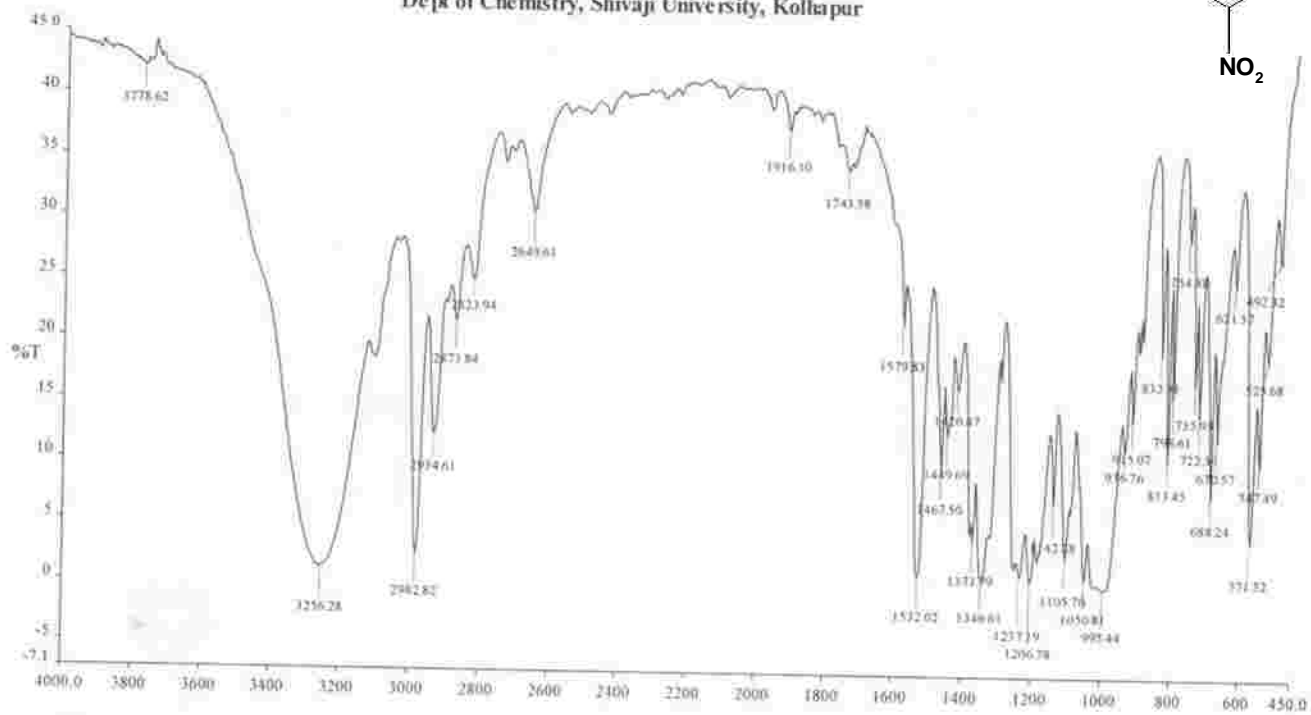

INSTRUMENT MODEL: PERKIN ELMER SPECTRUM 100.

Instrument Serial Number: 79720

— Ipr-4.002 - 23-09-10

Date Created: 23 September, 2010 5:24 PM India Standard Time

ANALYST:

*cm-1*

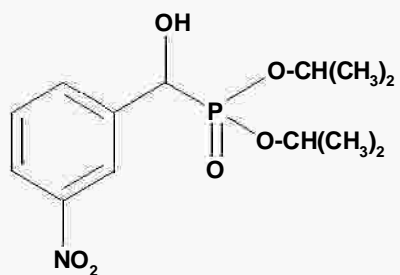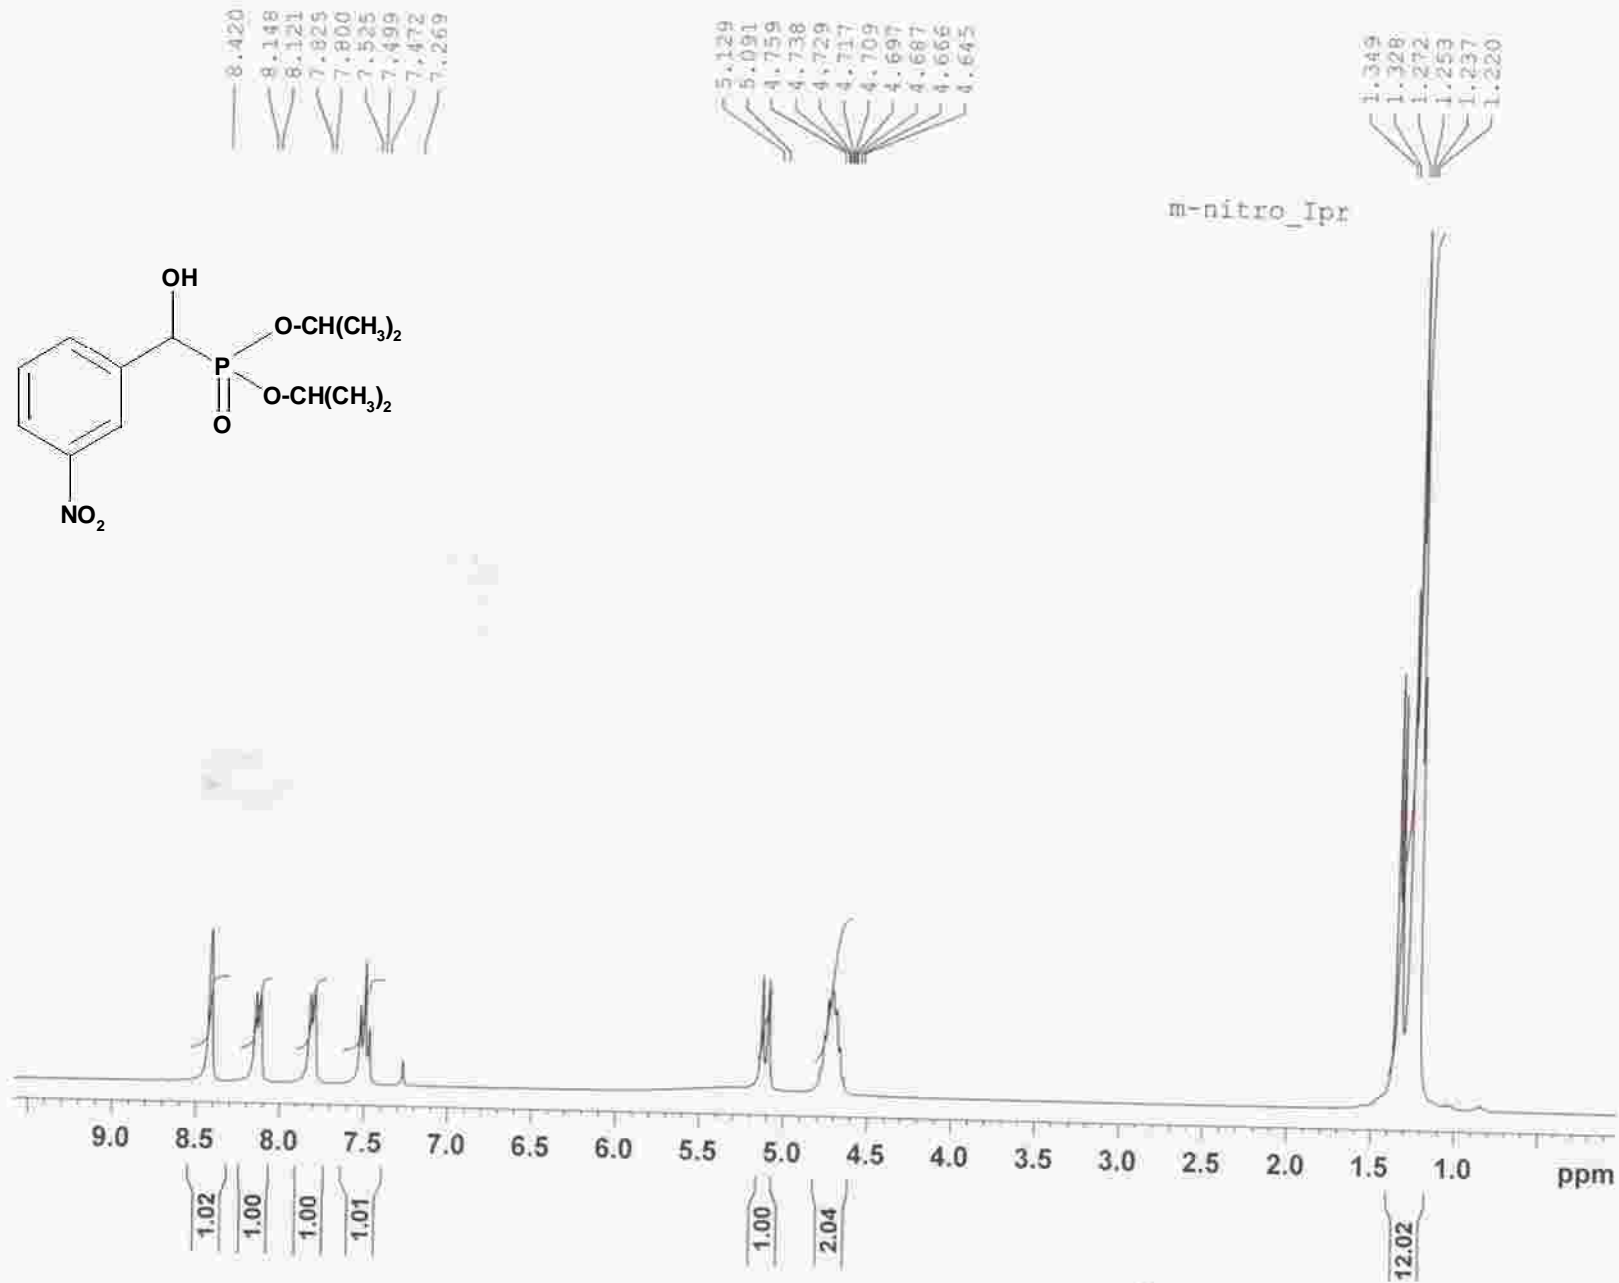

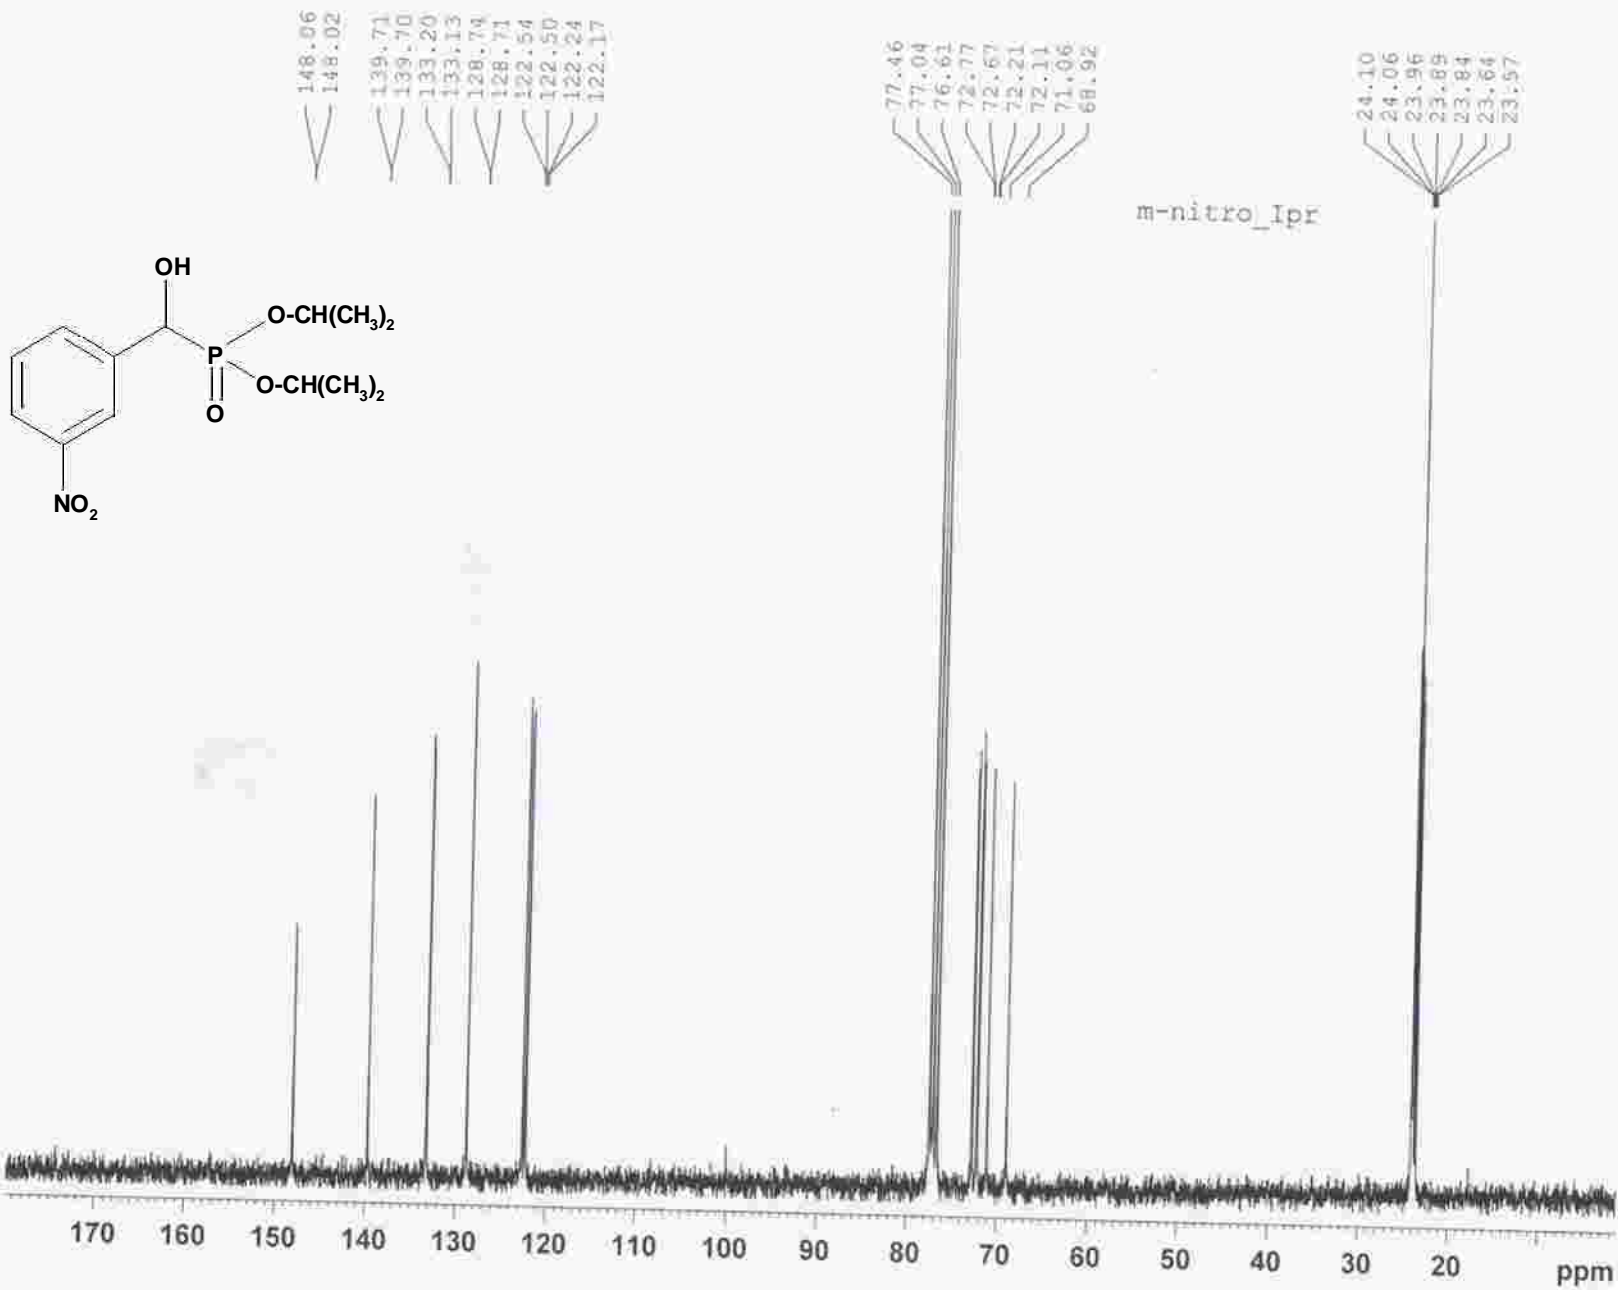



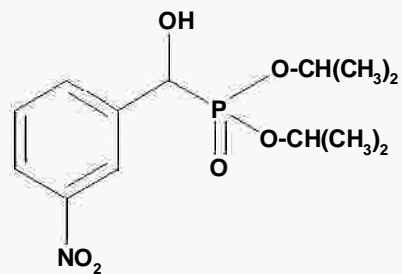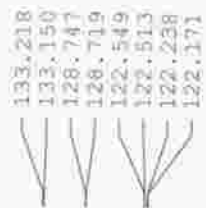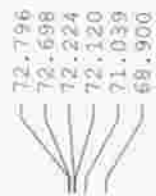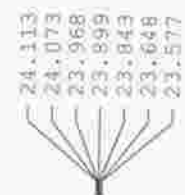

m-nitro\_ipr

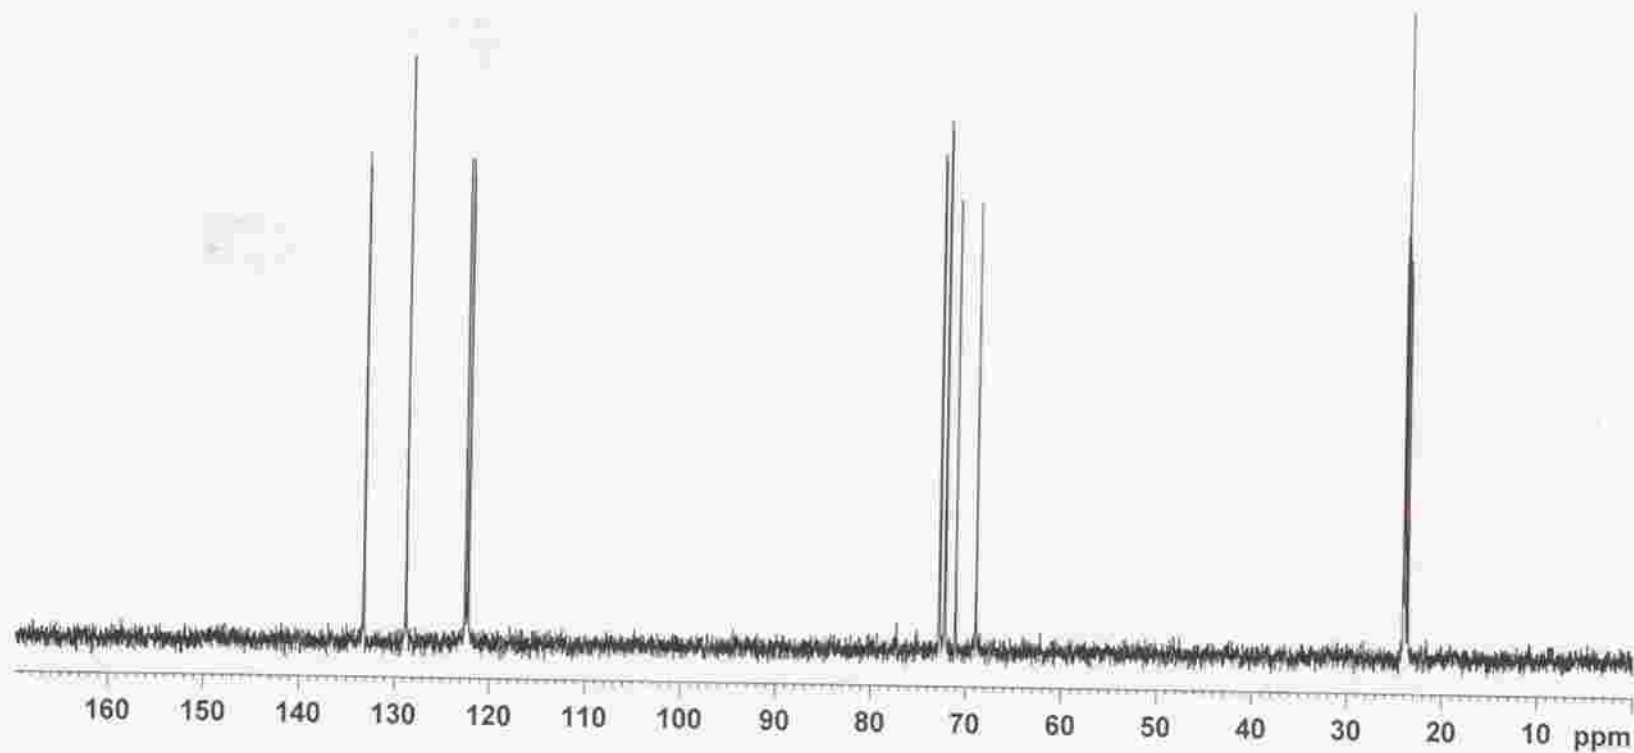

0.000000 0.000000

*i*-P<sub>2</sub> = 4

\*TOF MS: 0.050 to 0.333 min from IPR-4.wif  
a=3.31839173977184490e-004, t0=3.49418683411422530e+001

Max: 0.3 counts

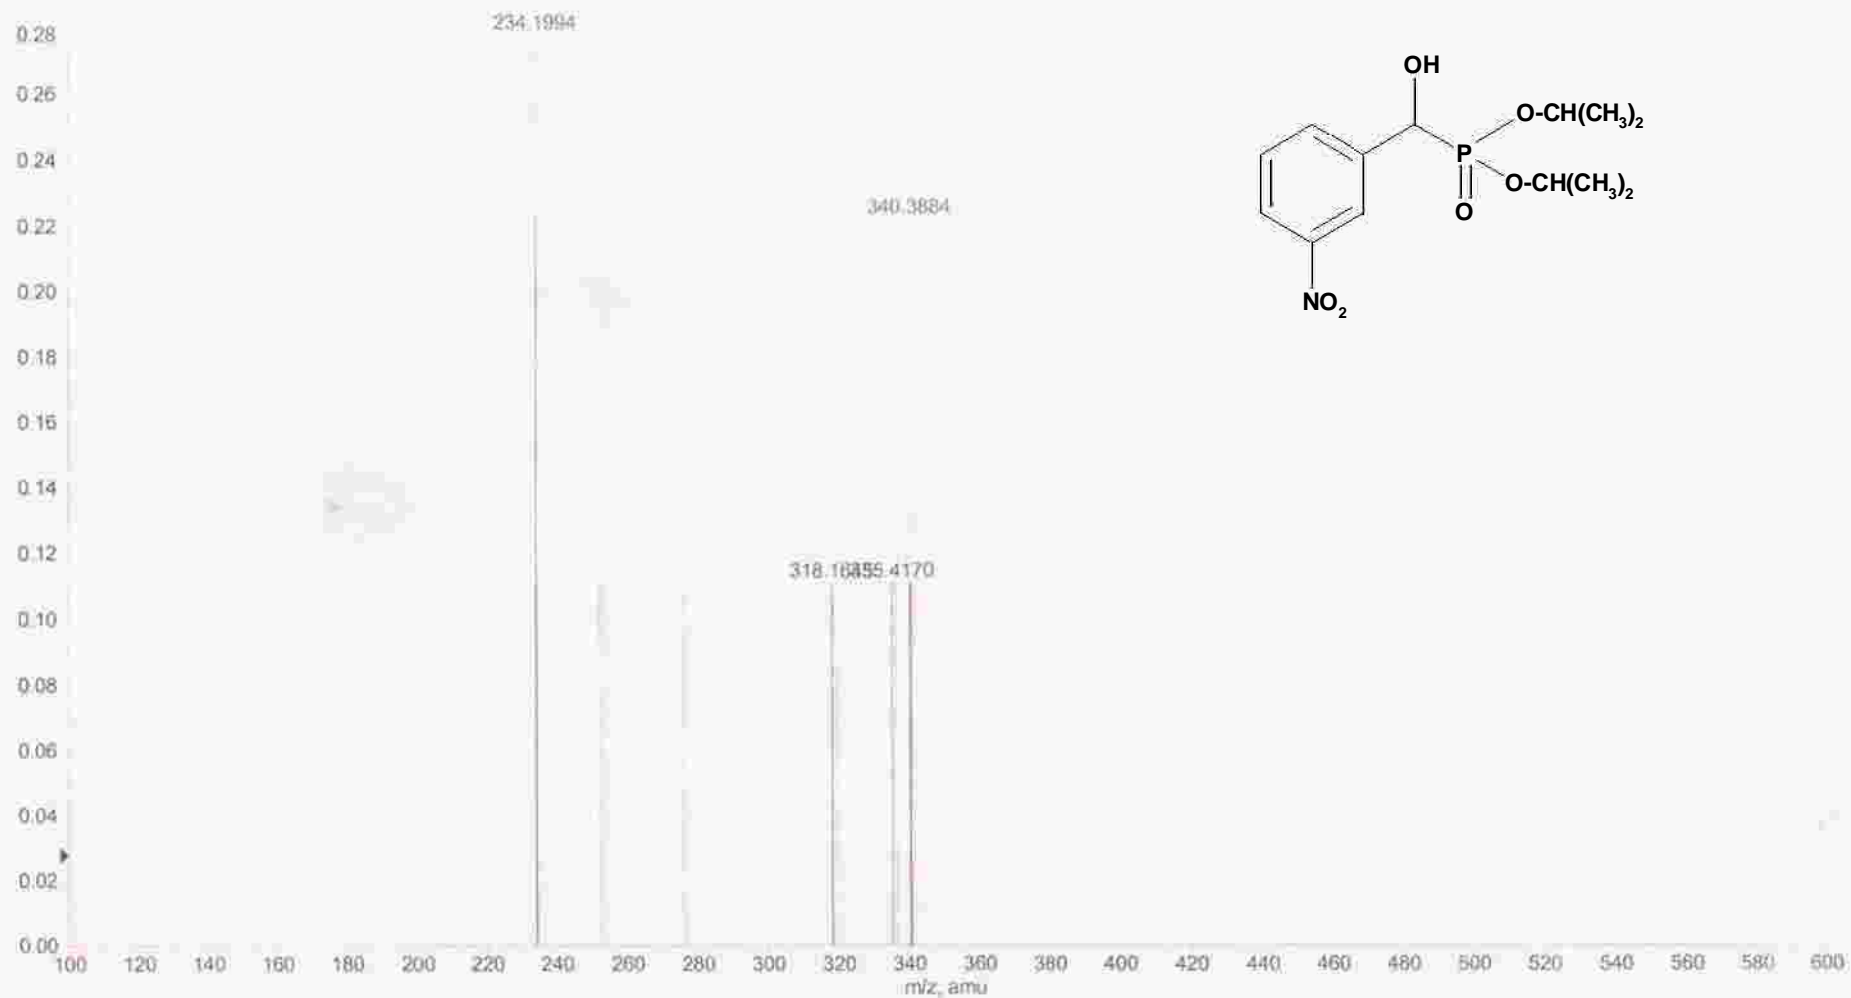

GMI-1

Dept of Chemistry, Shivaji University, Kolhapur

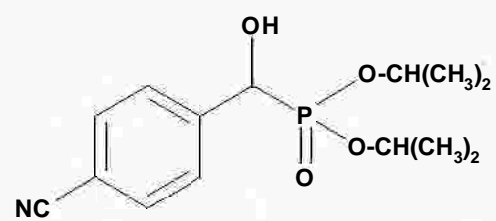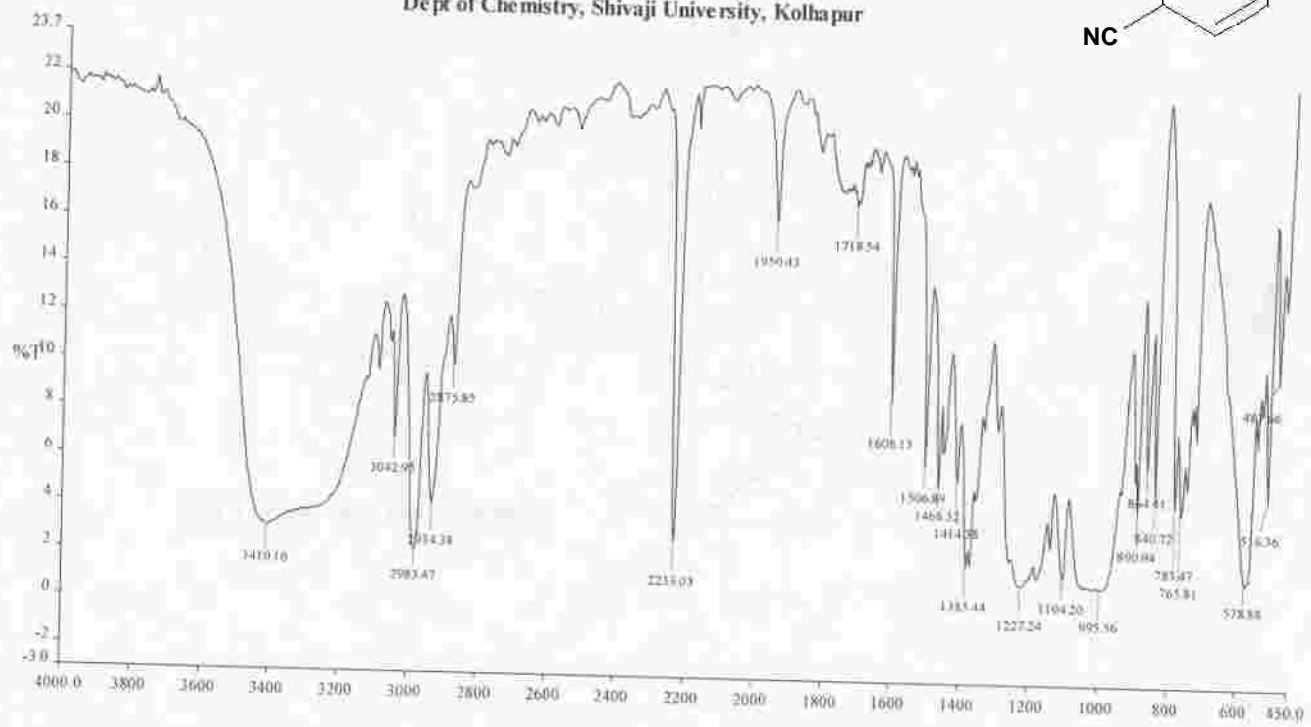

INSTRUMENT MODEL: PERKIN ELMER SPECTRUM 100.  
Instrument Serial Number: 79720  
Ipr-3.002 - 23-09-10

Date Created: 23 September, 2010 4:28 PM India Standard Time

ANALYSIS:

**cm-1**

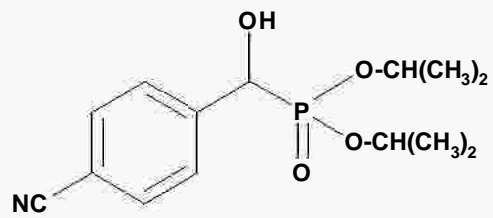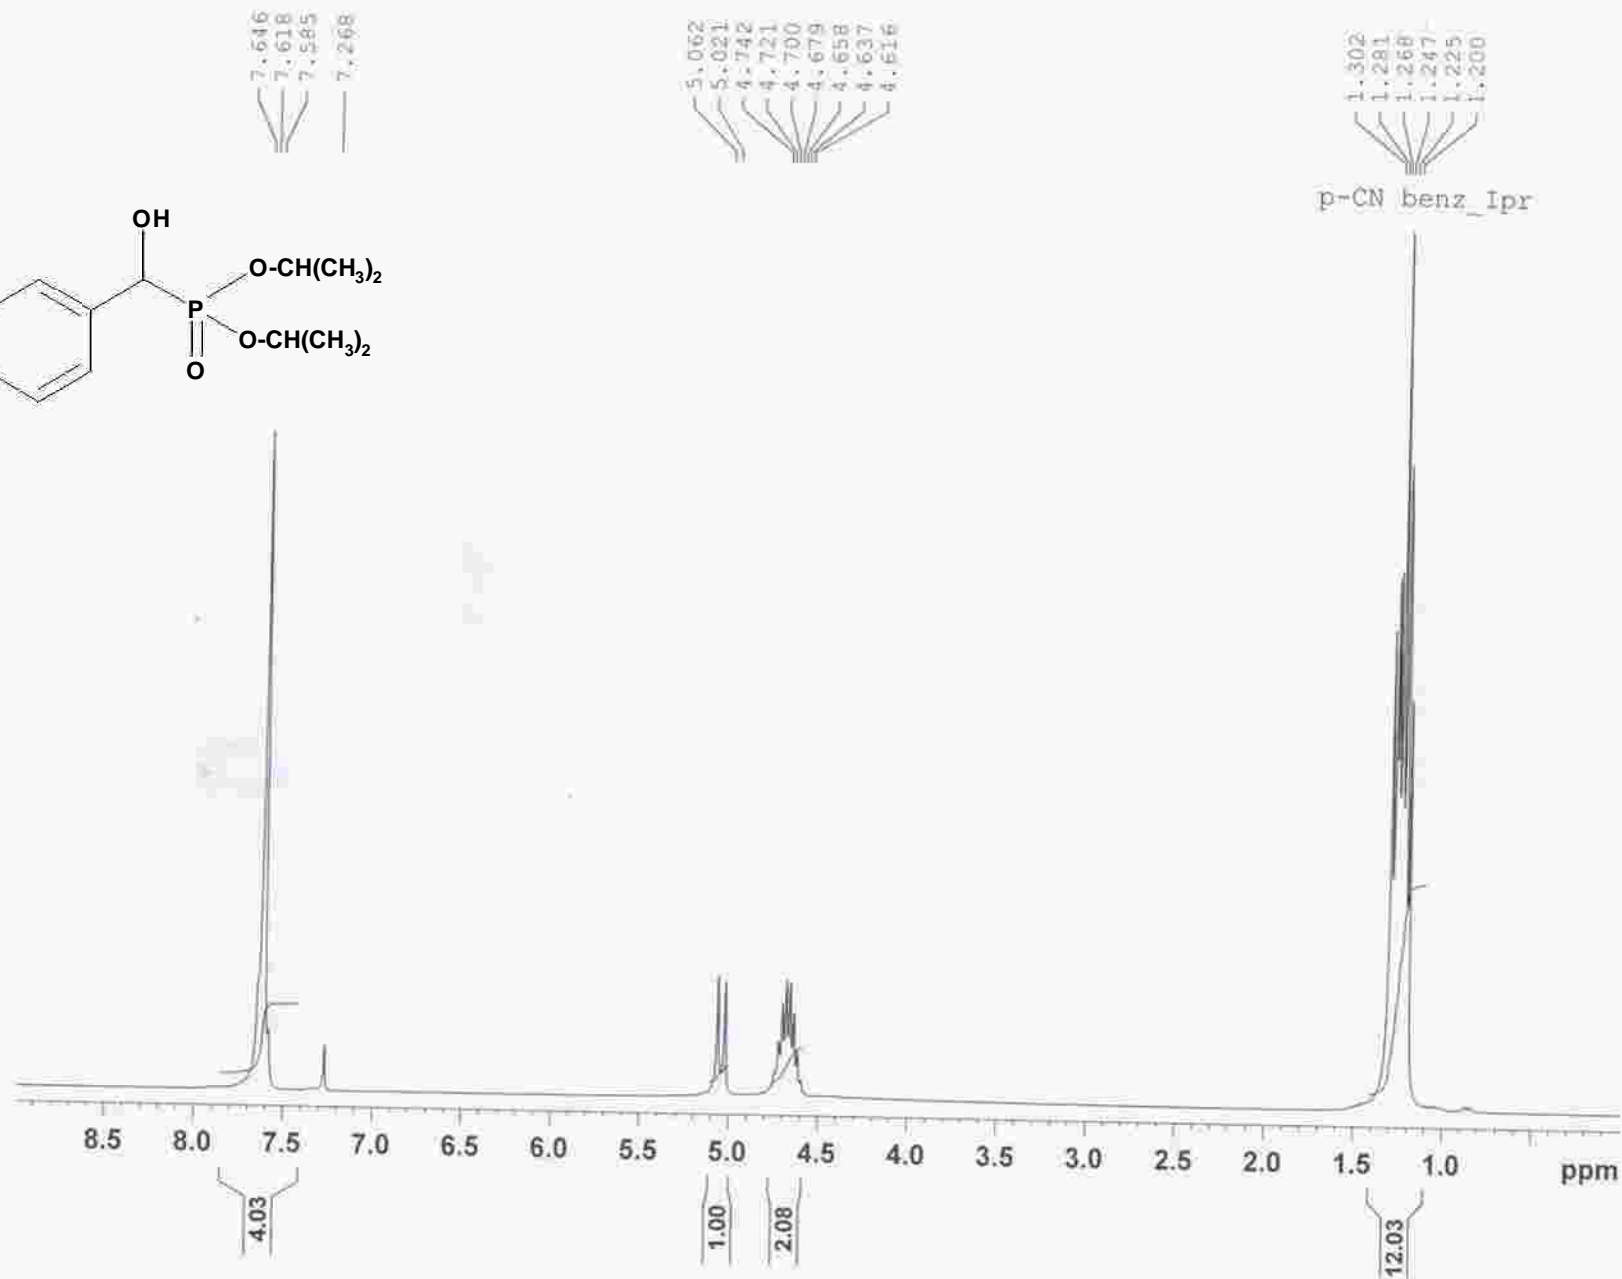

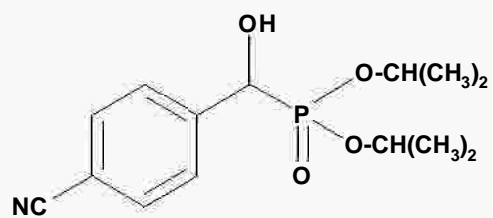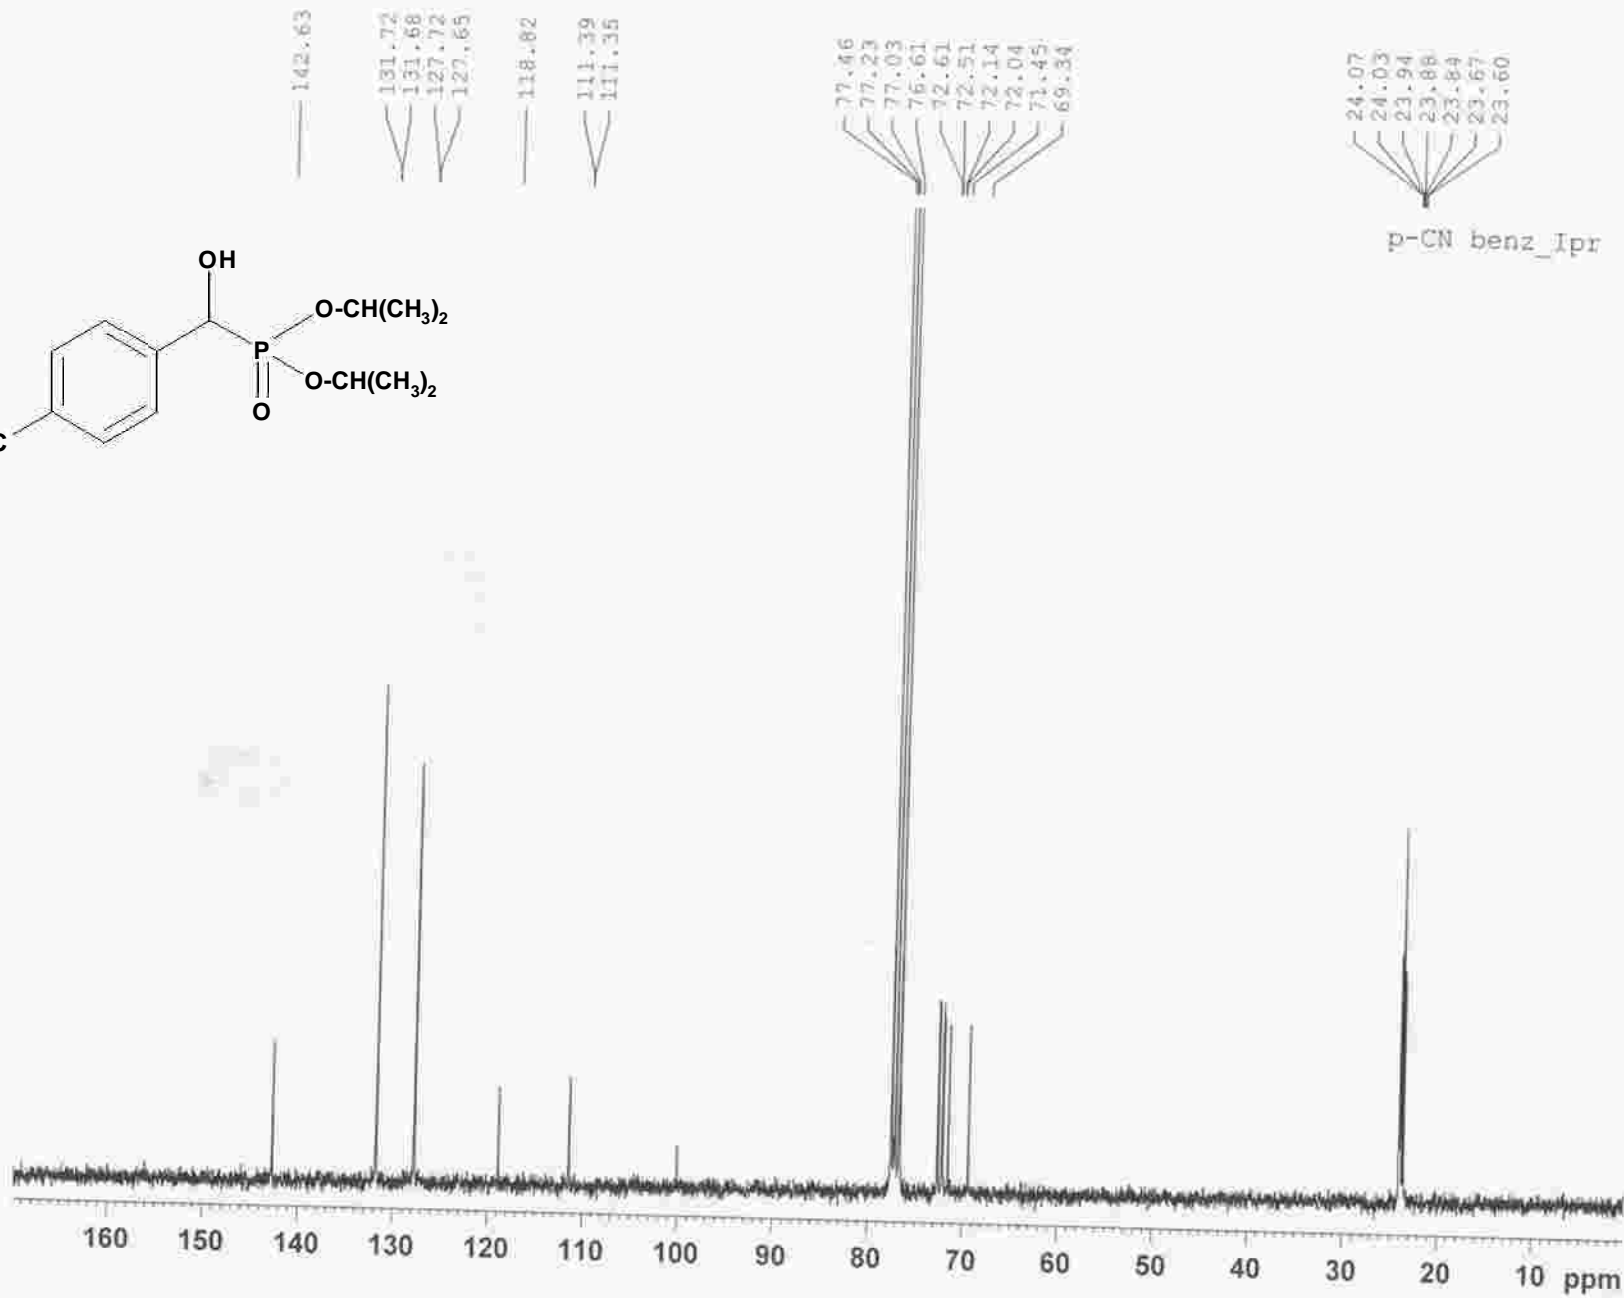

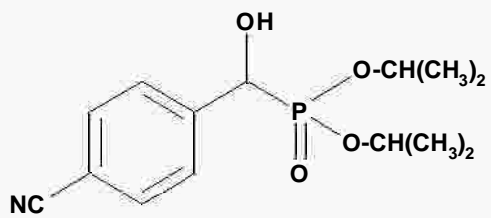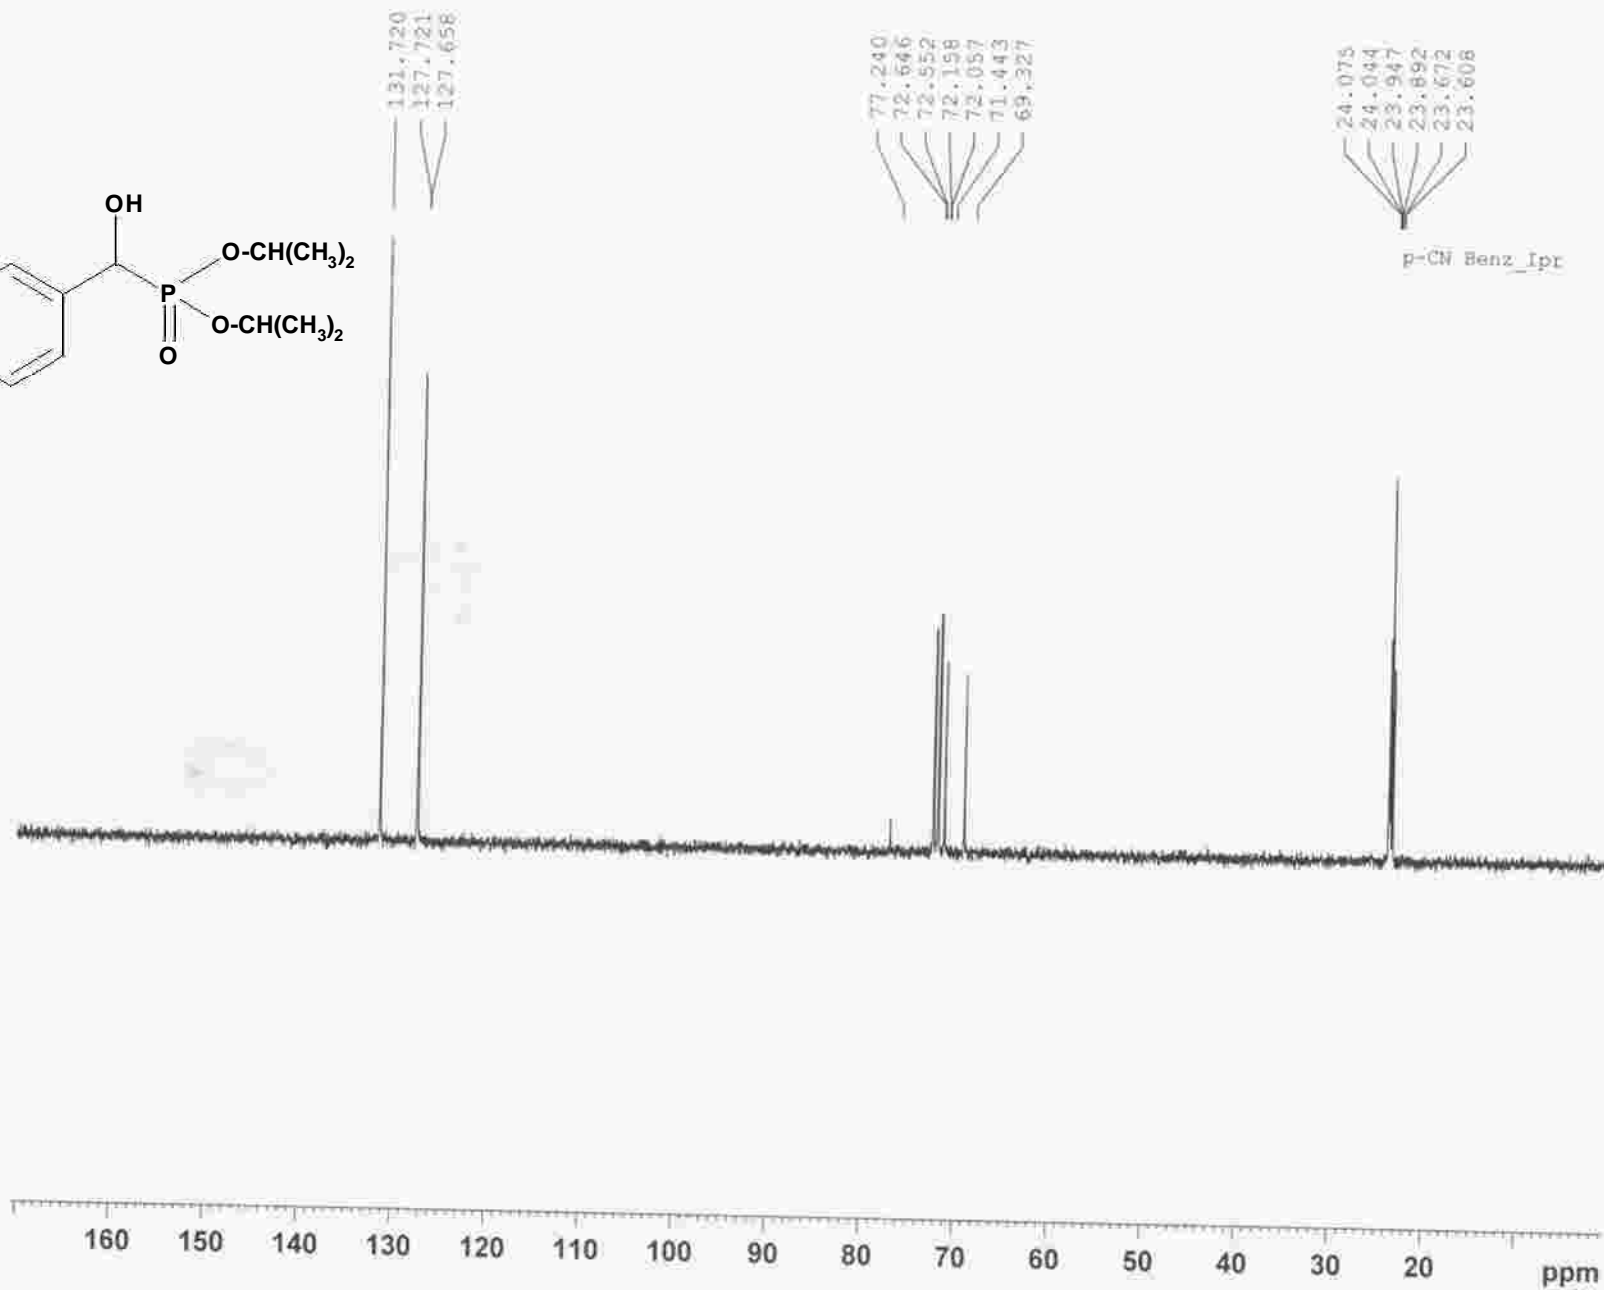

2-Pr-3

Max: 0.3 counts

+TOF MS: 0.050 to 0.350 min from IPR-3.wiff  
a=3.31839173977164490e-004, 10=-3.49410683411422630e+001

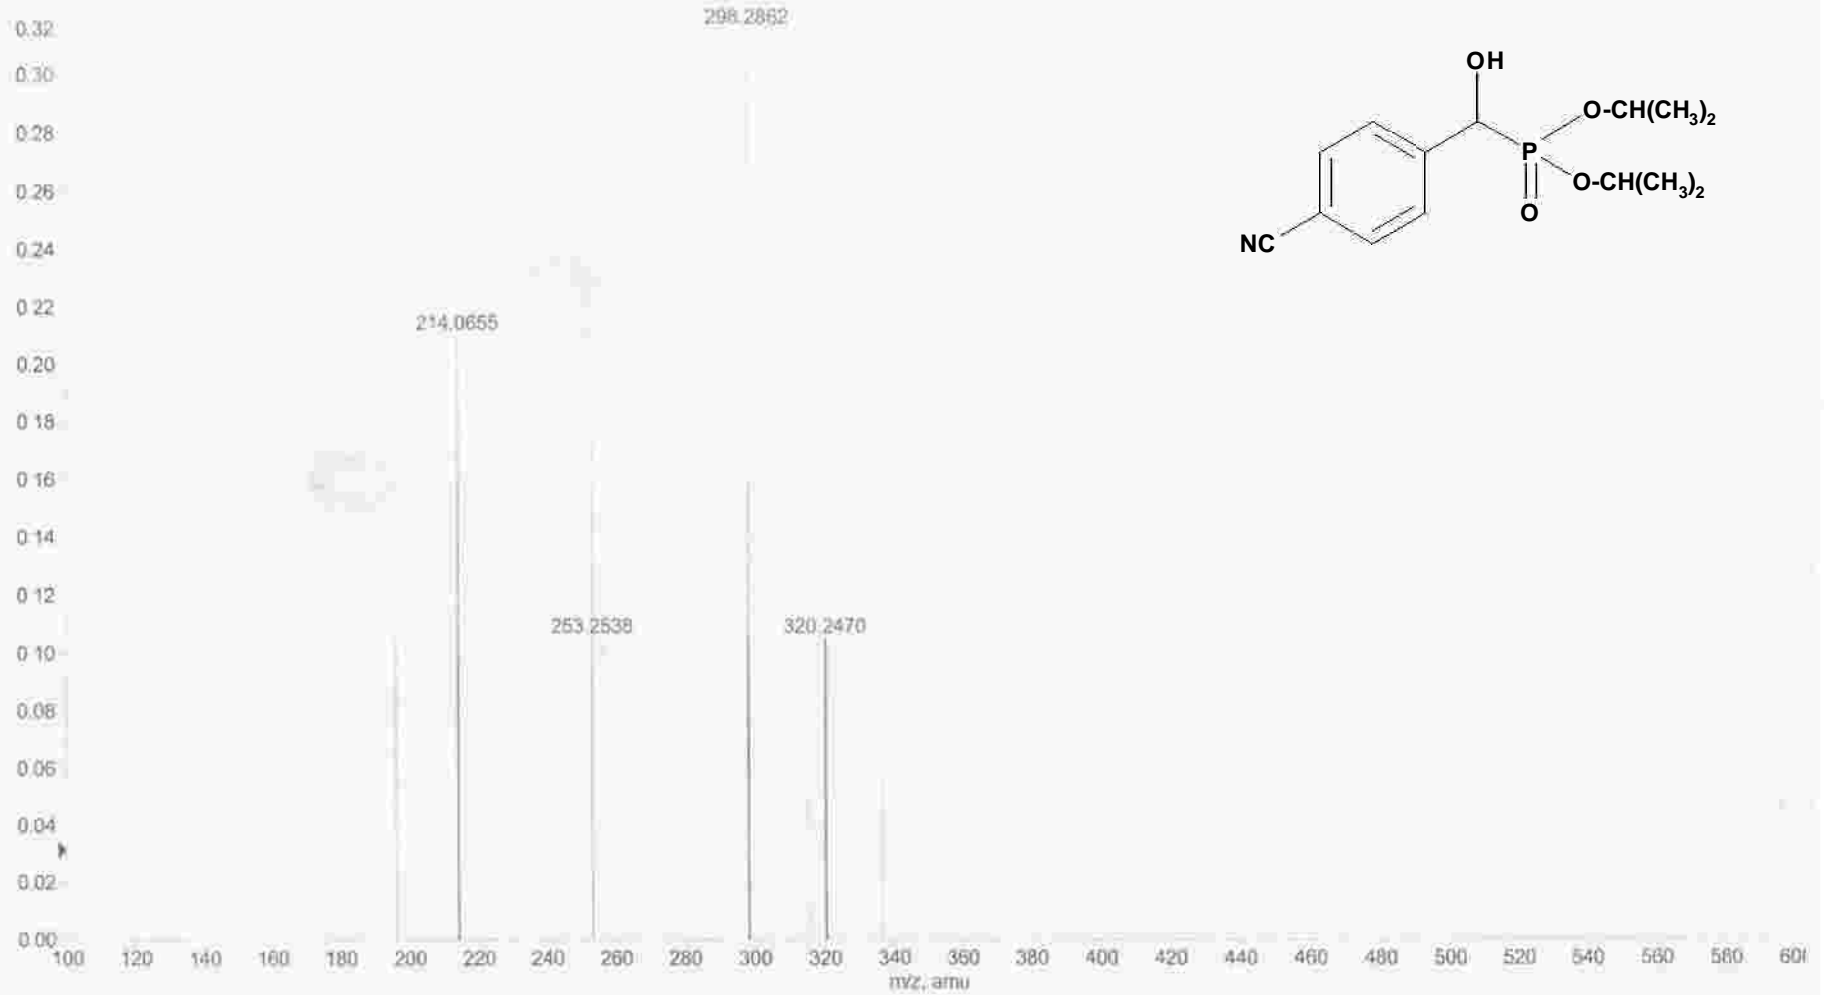

Dept of Chemistry, Shivaji University, Kolhapur

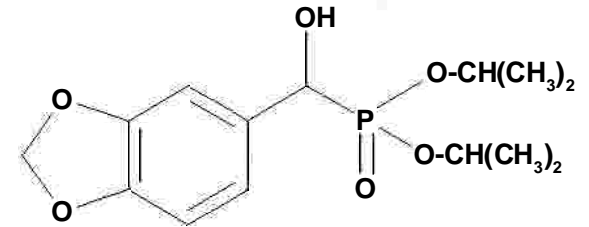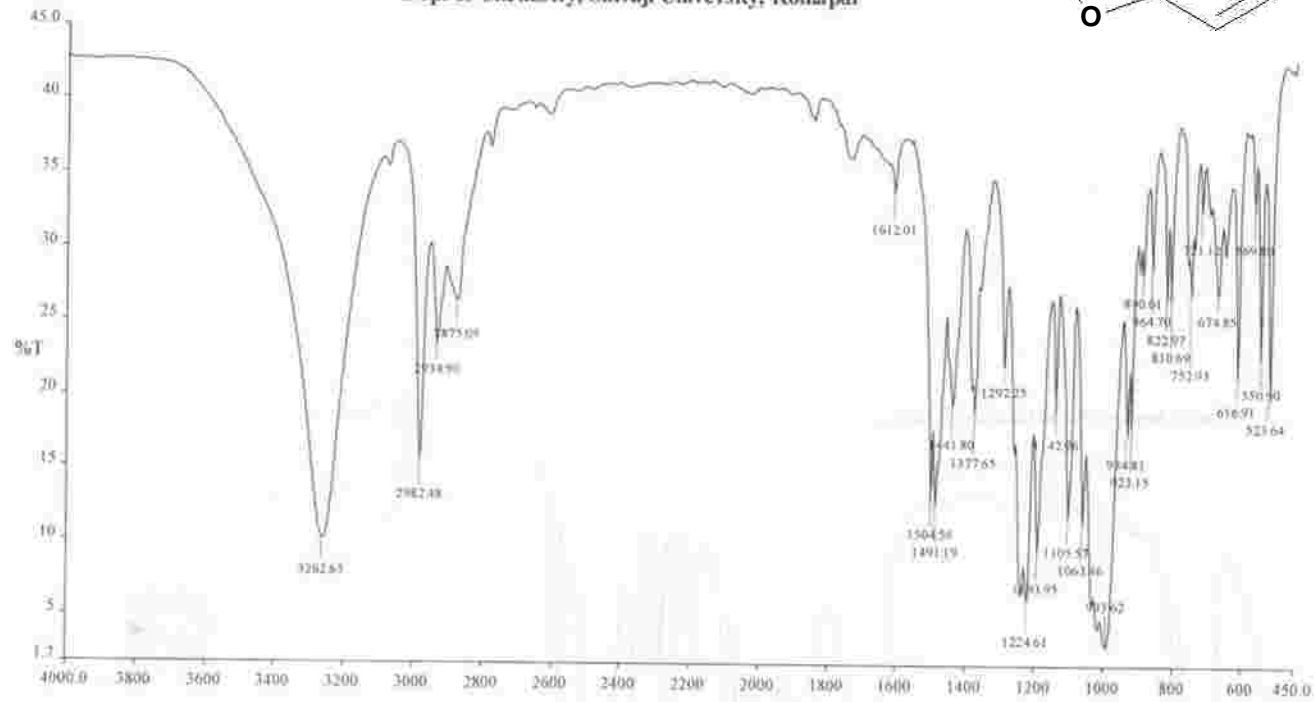

Date Created: 23 September, 2010 9:47 PM India Standard Time

INSTRUMENT MODEL: PERKIN ELMER SPECTRUM 100.  
Instrument Serial Number: 79720

— Piperial-DIP.002 - 23-09-10

ANALYSIS  
**cm-1**



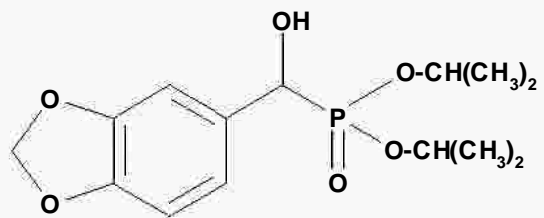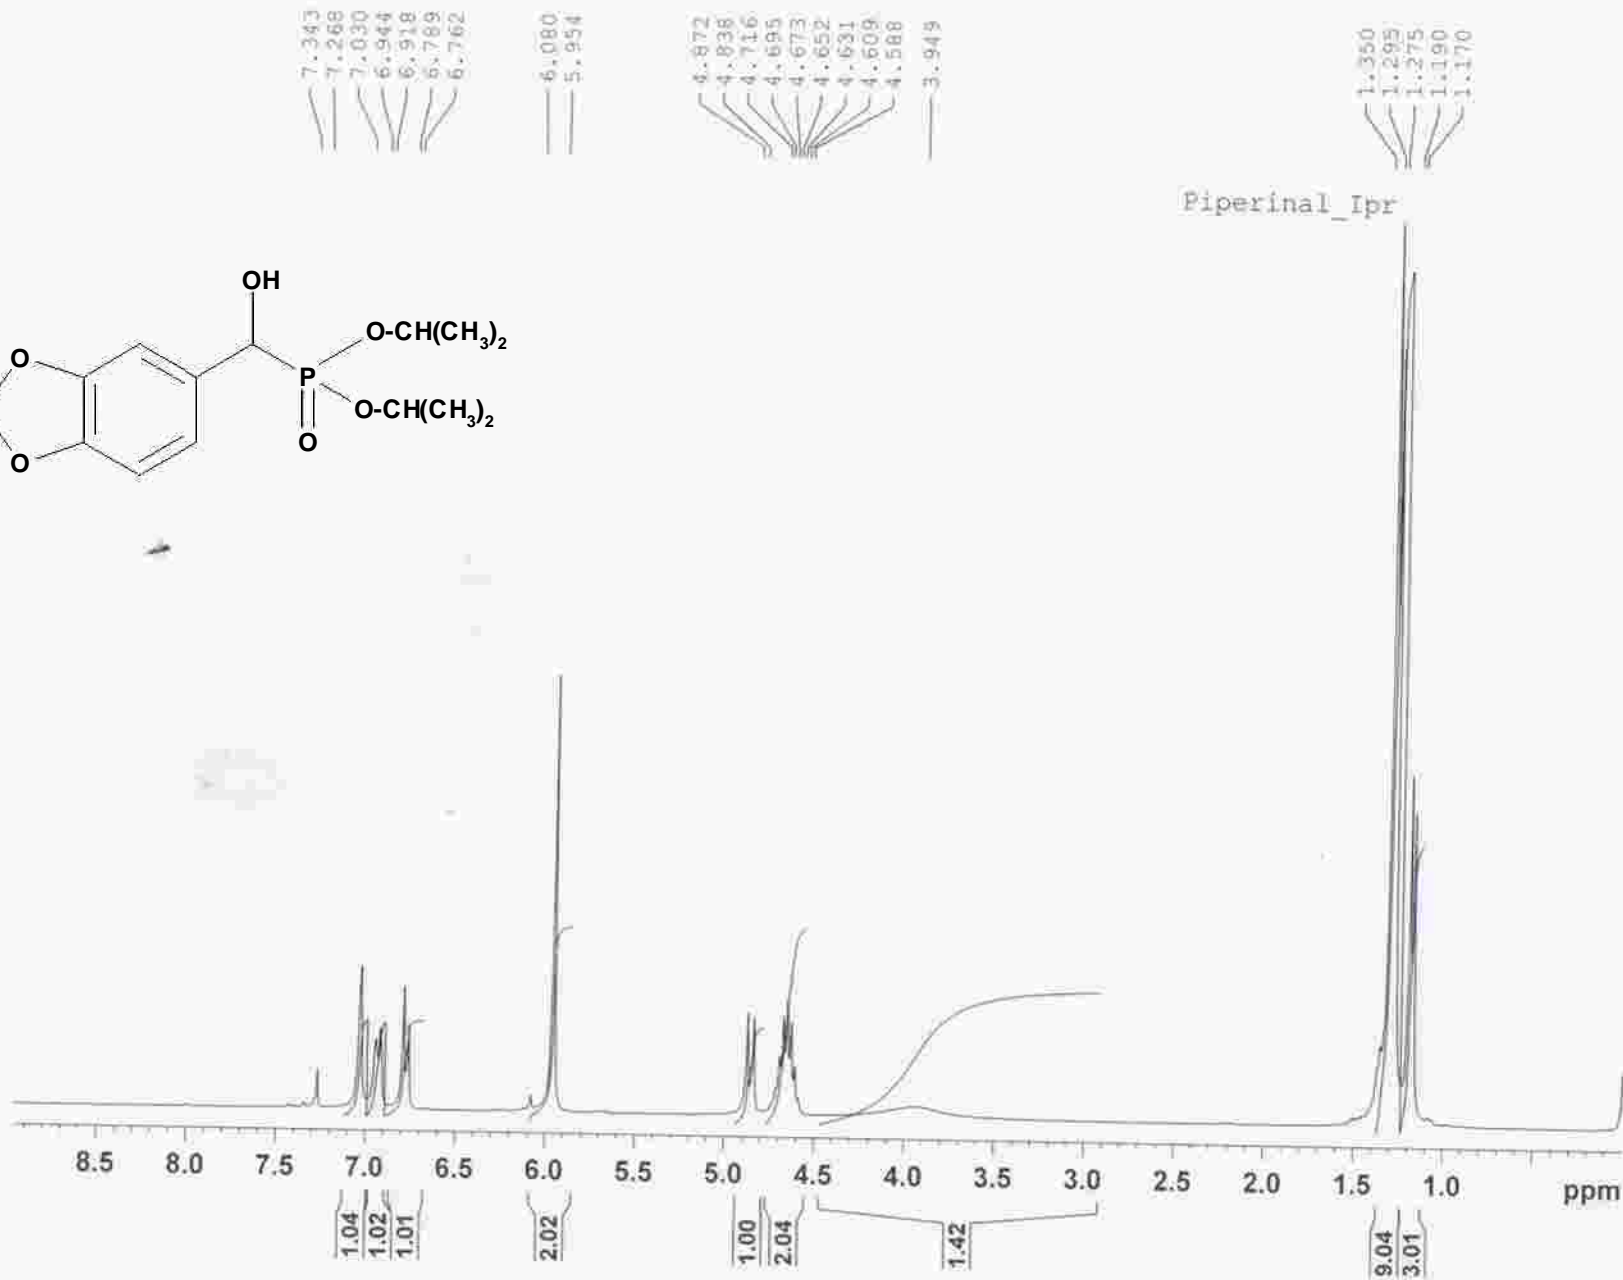

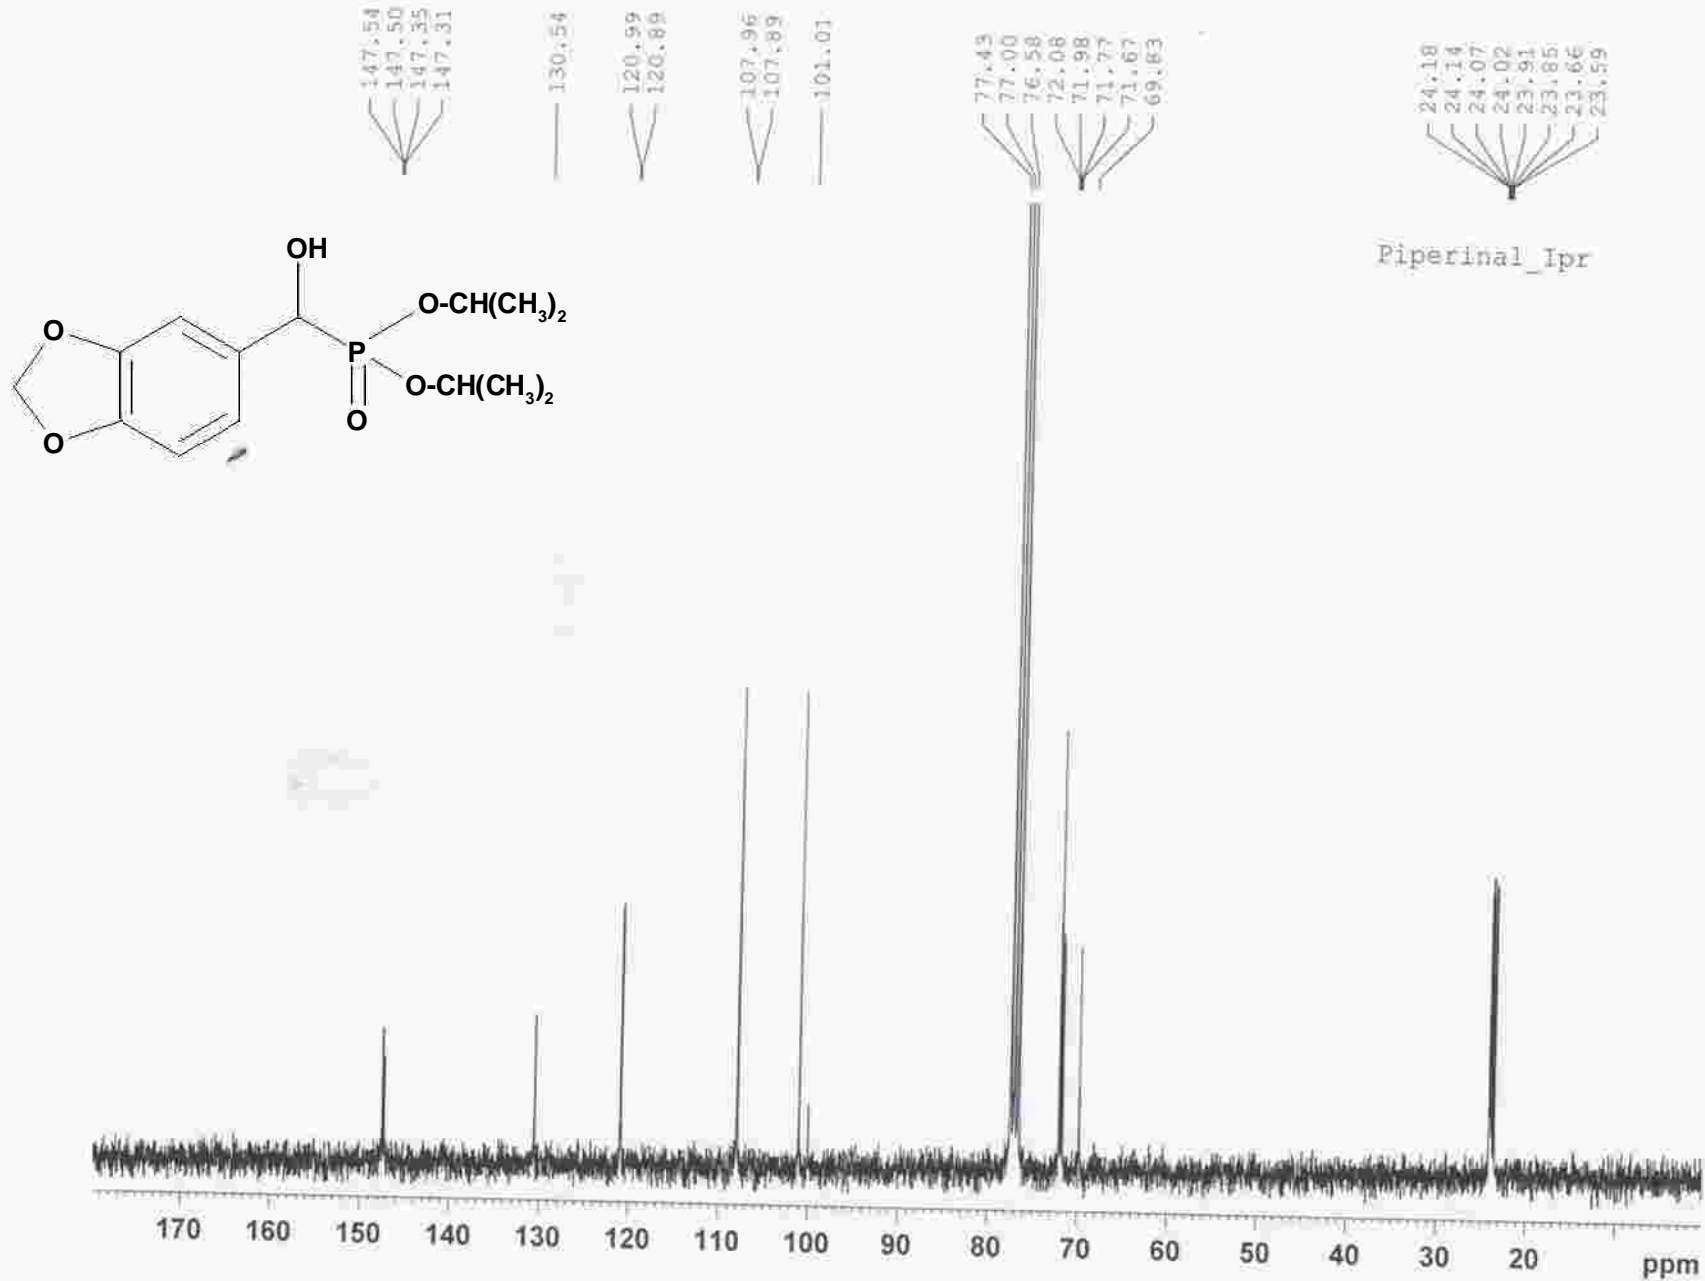

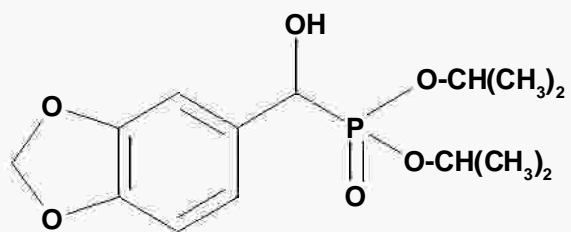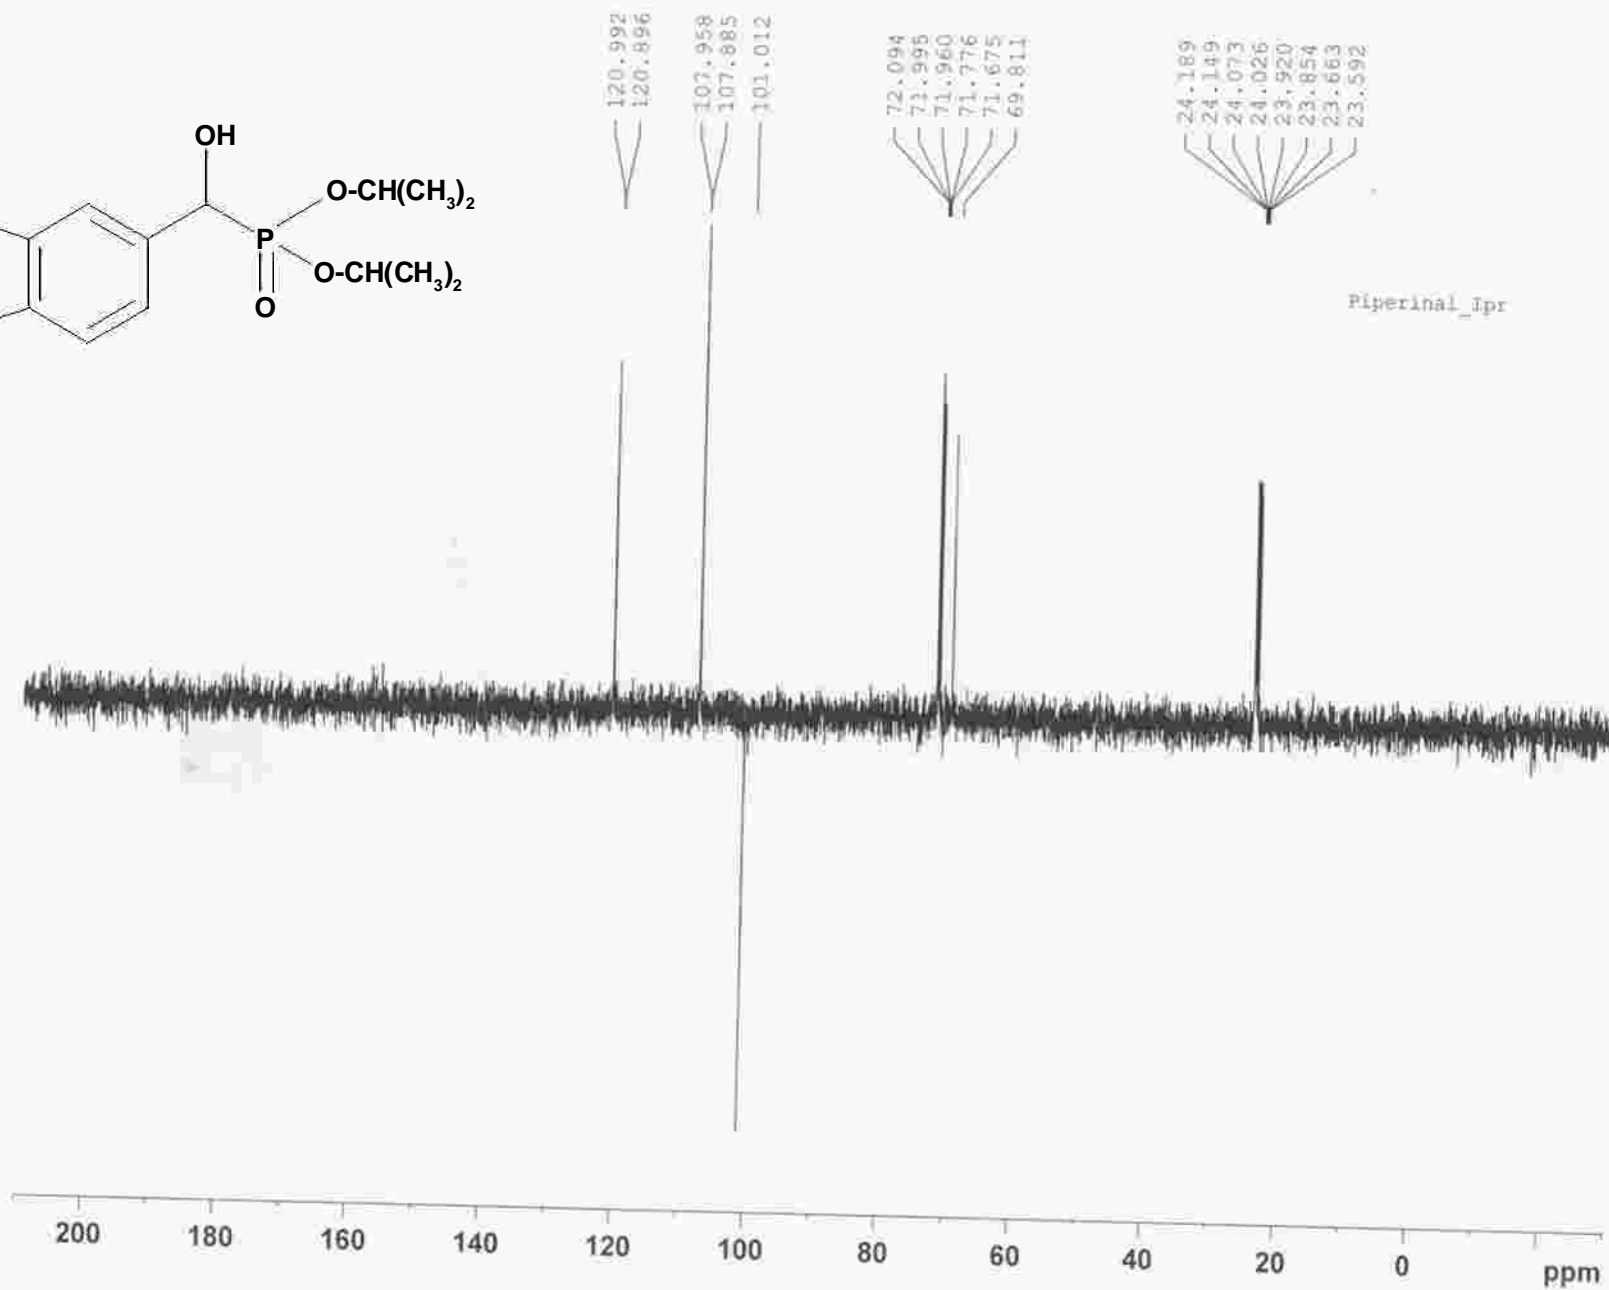

+TOF MS: 0.017 to 0.417 min from PIPERNAL\_DIPR.wiff  
 a=3.37719425928799980e-004, l0=-3.54887063182468410e+001

Max. 272.8 counts.

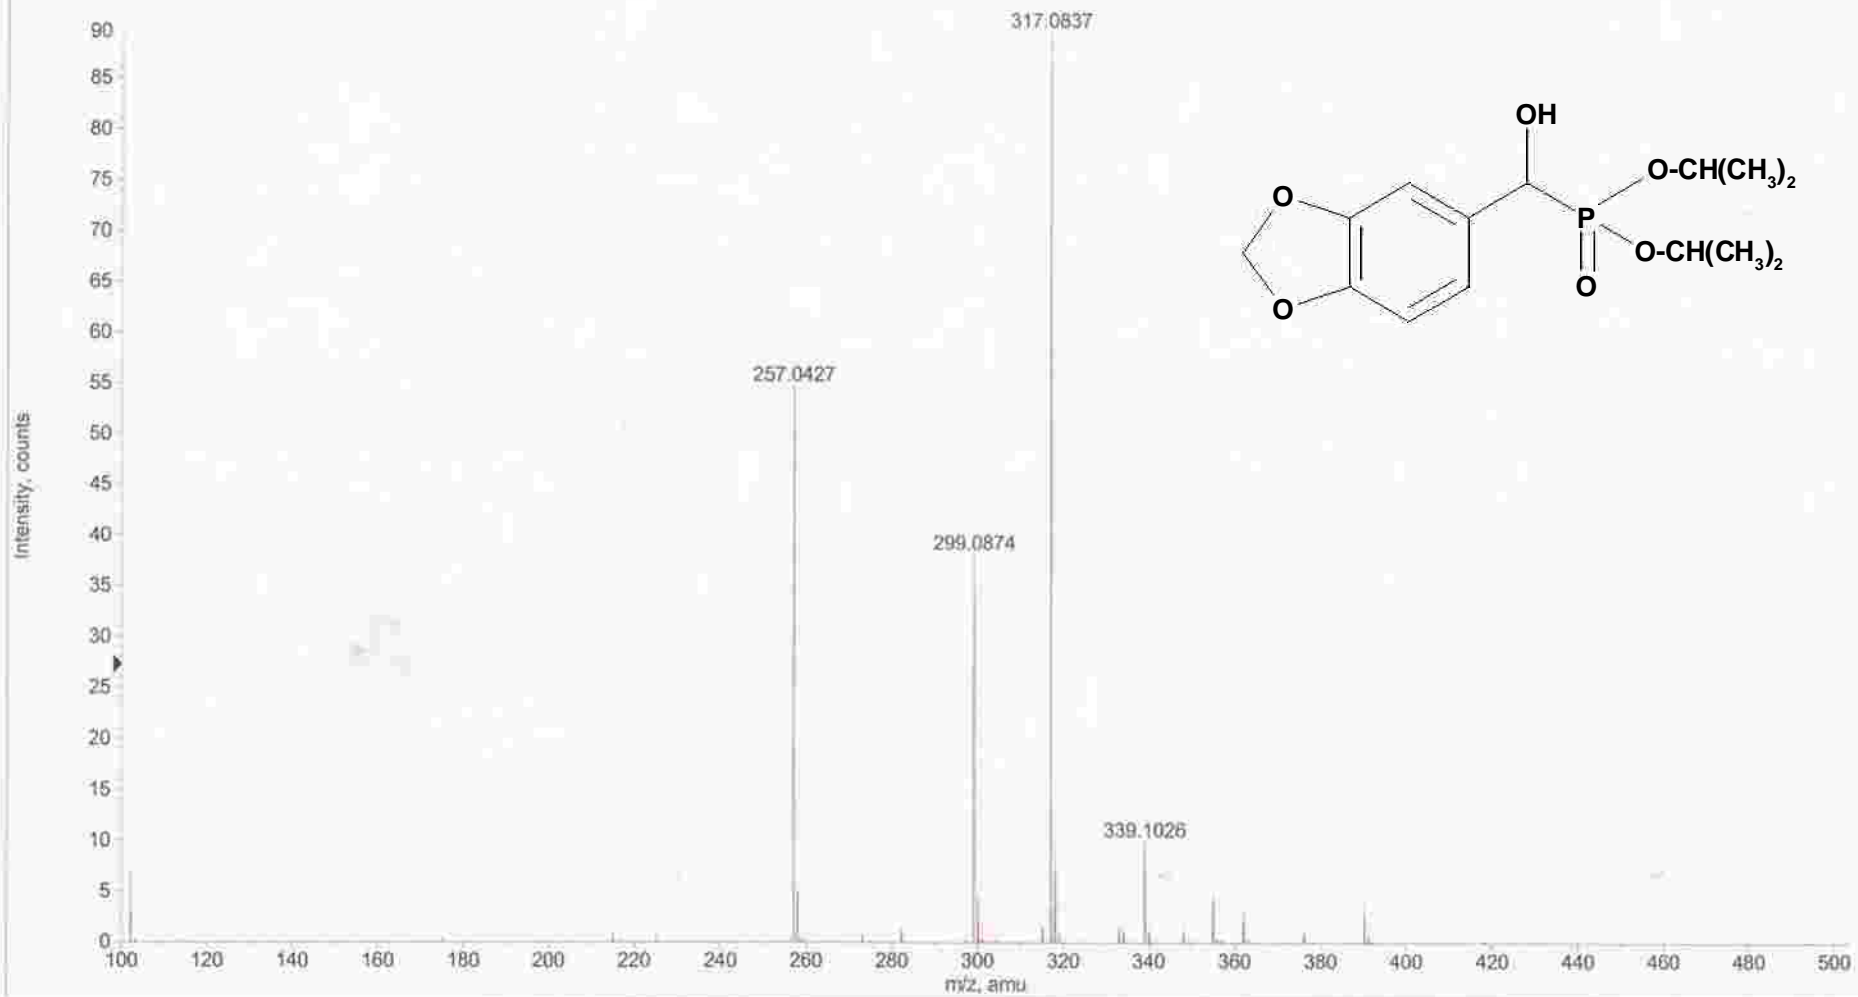

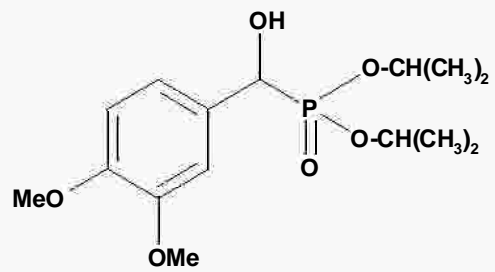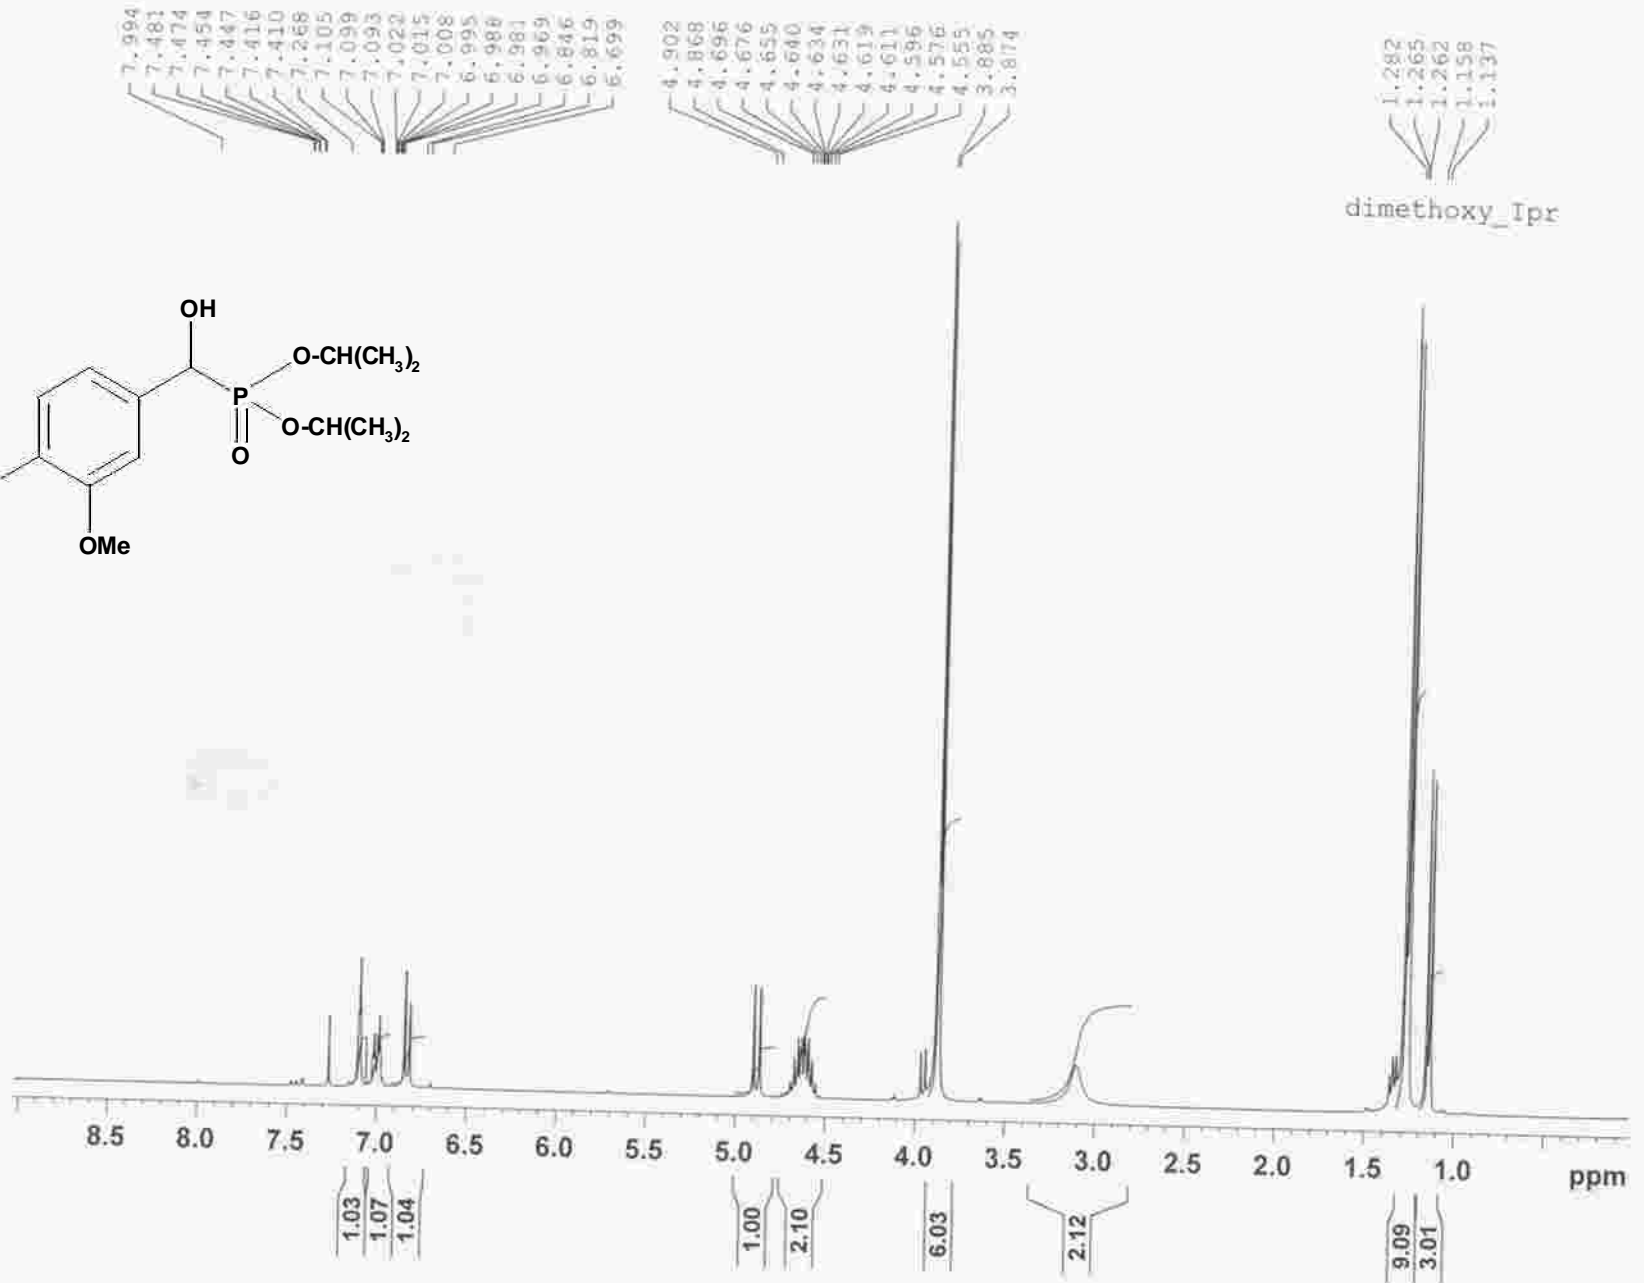

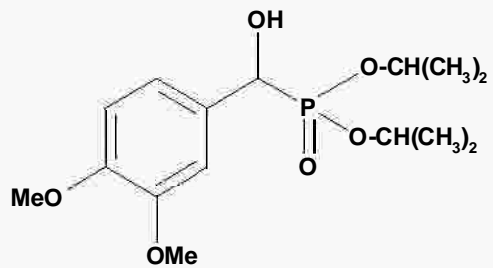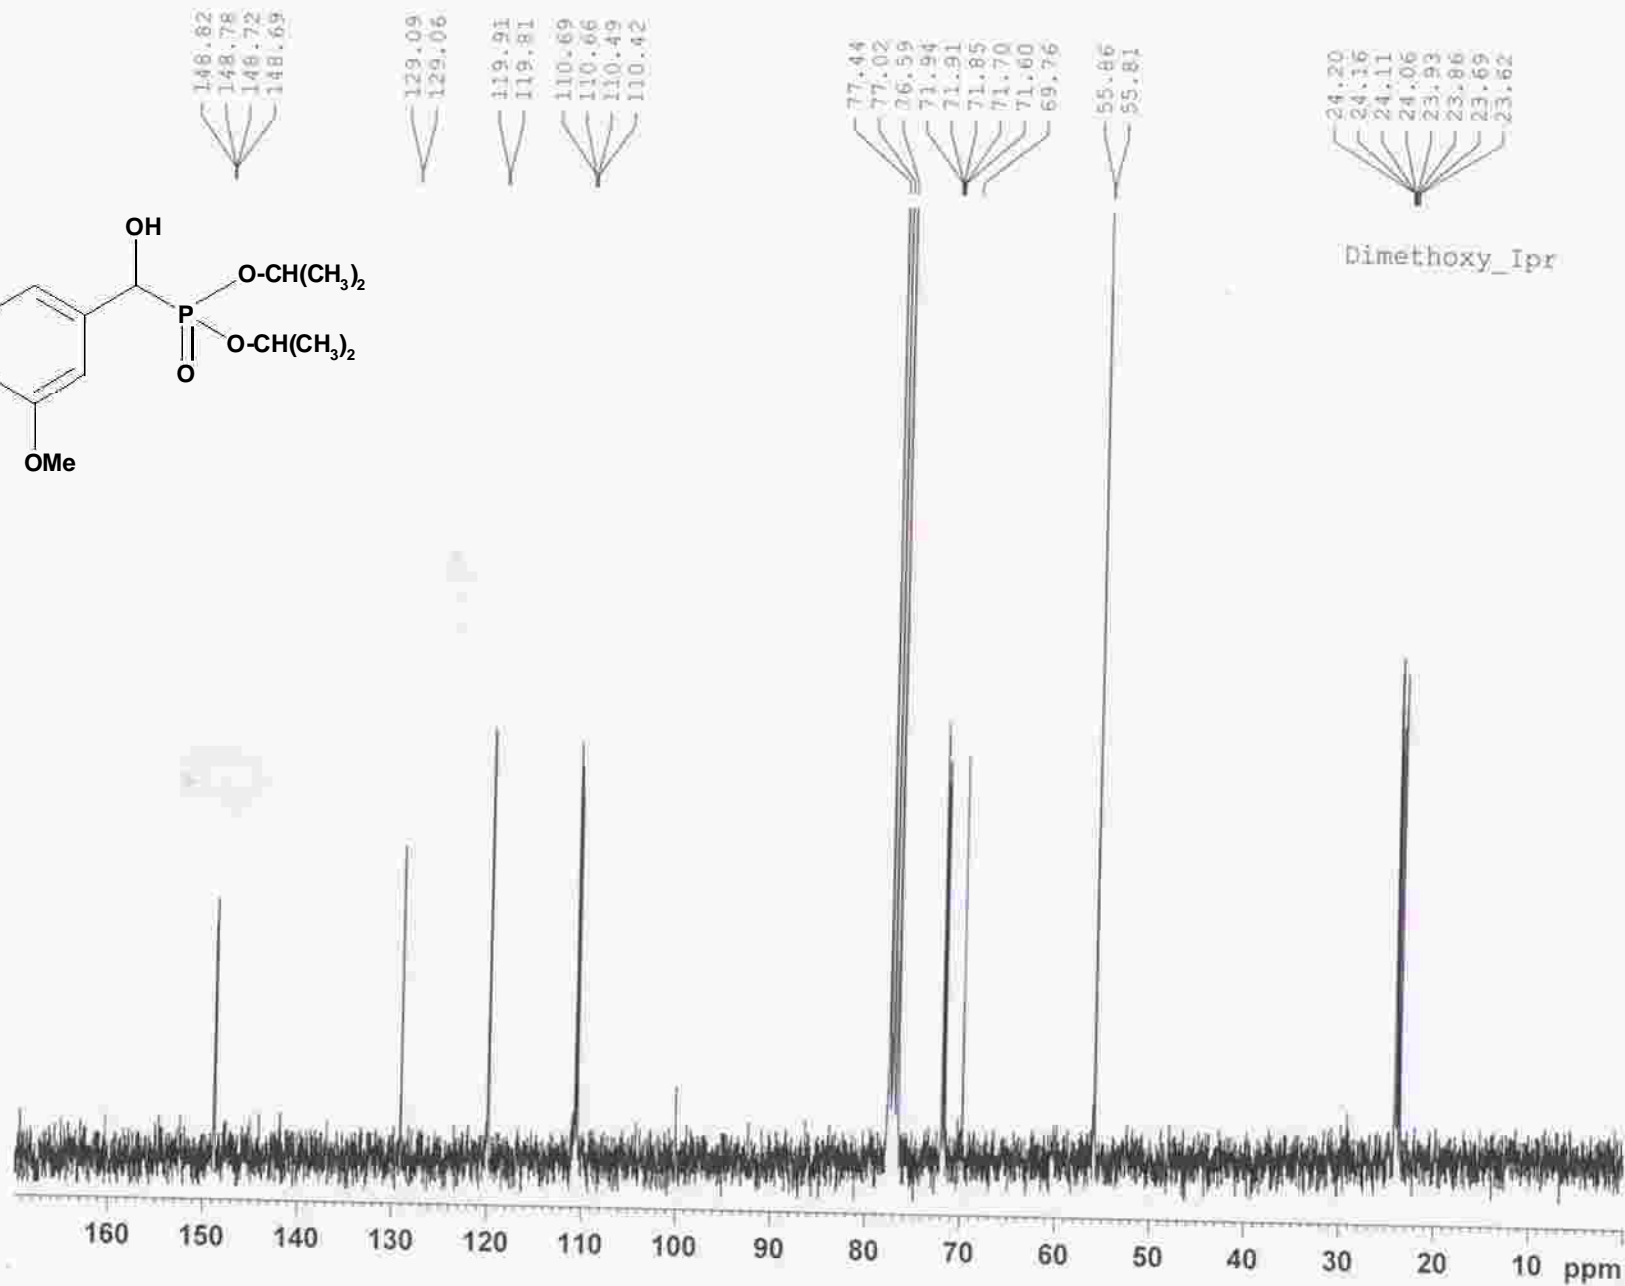

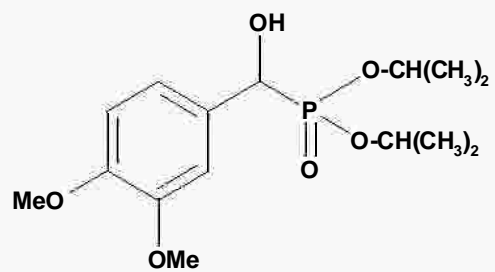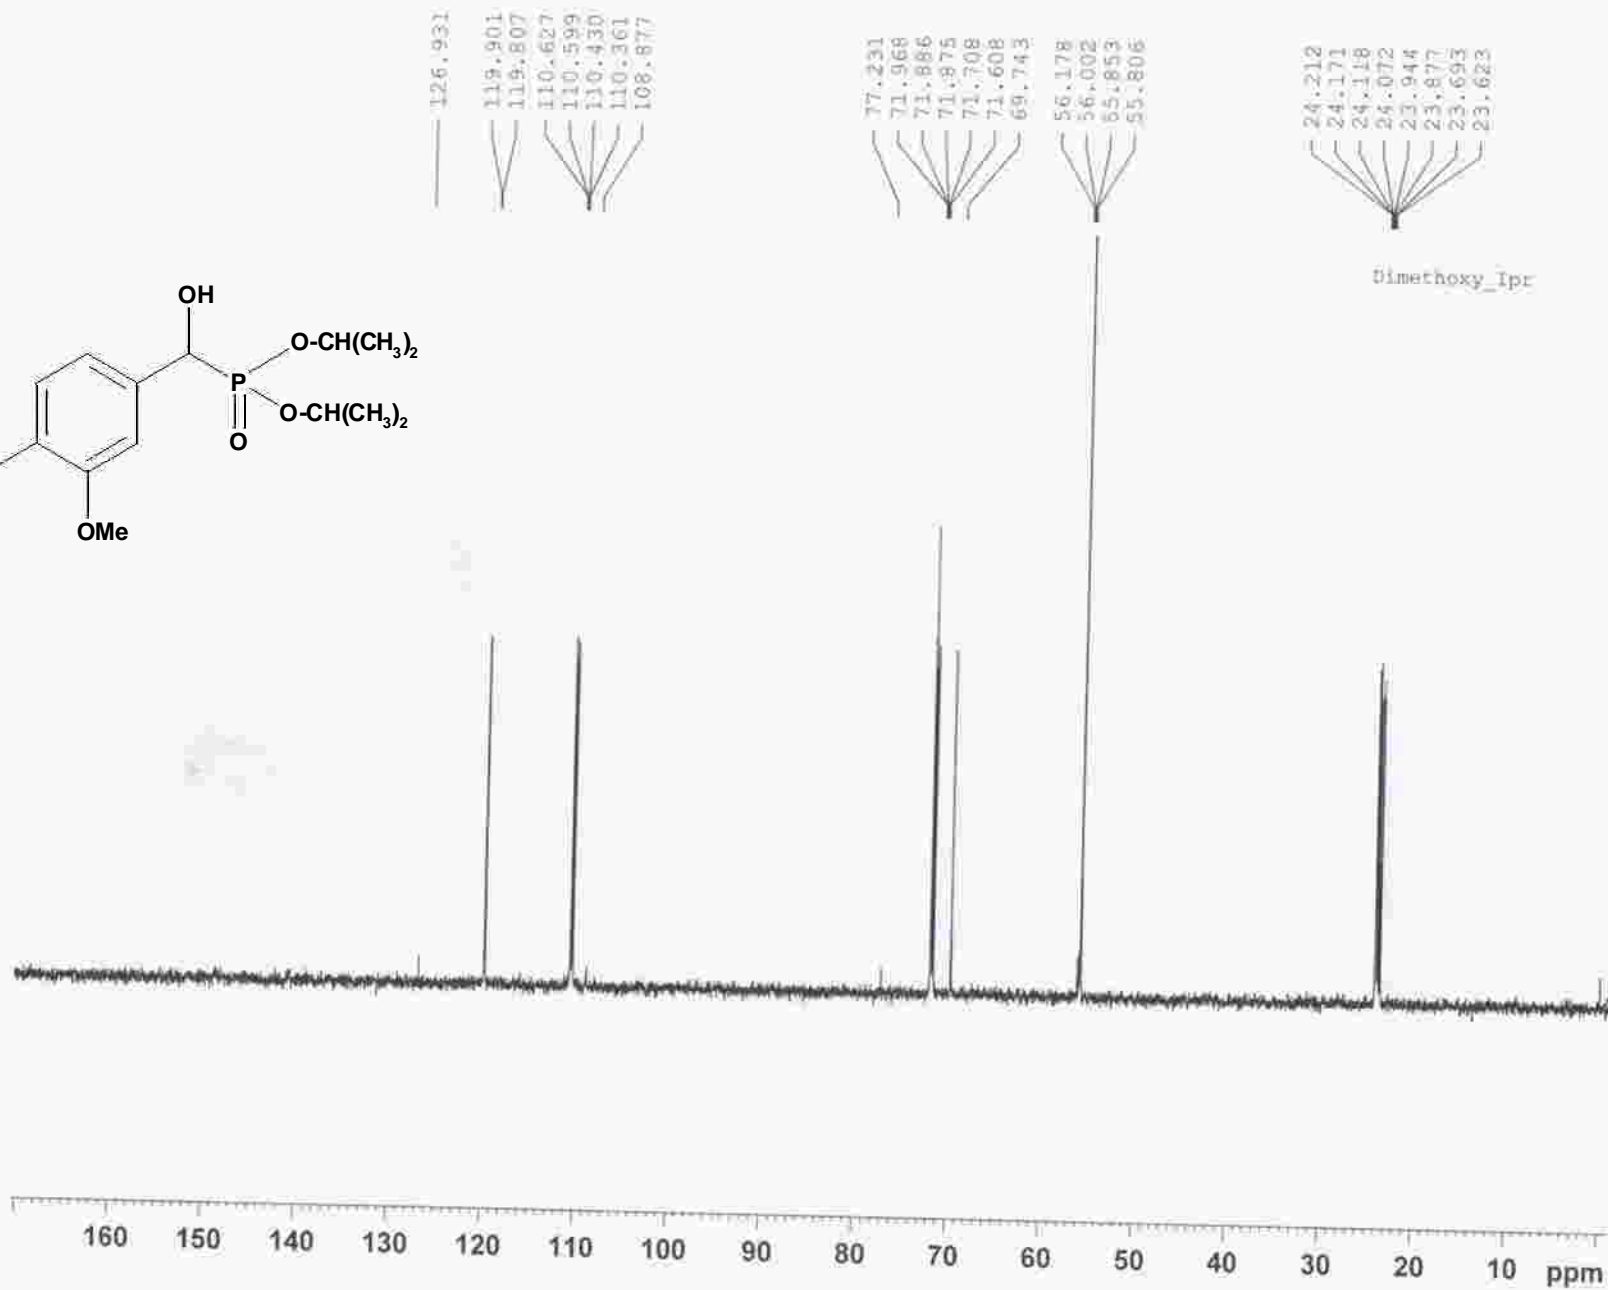

+TOF MS: 0.017 to 0.833 min from 3,4-DI-METOXY\_DiPR.wiff  
 a=3.37719425928799980e-004, t0=-3.54887063182468410e+001

Max. 29.1 counts

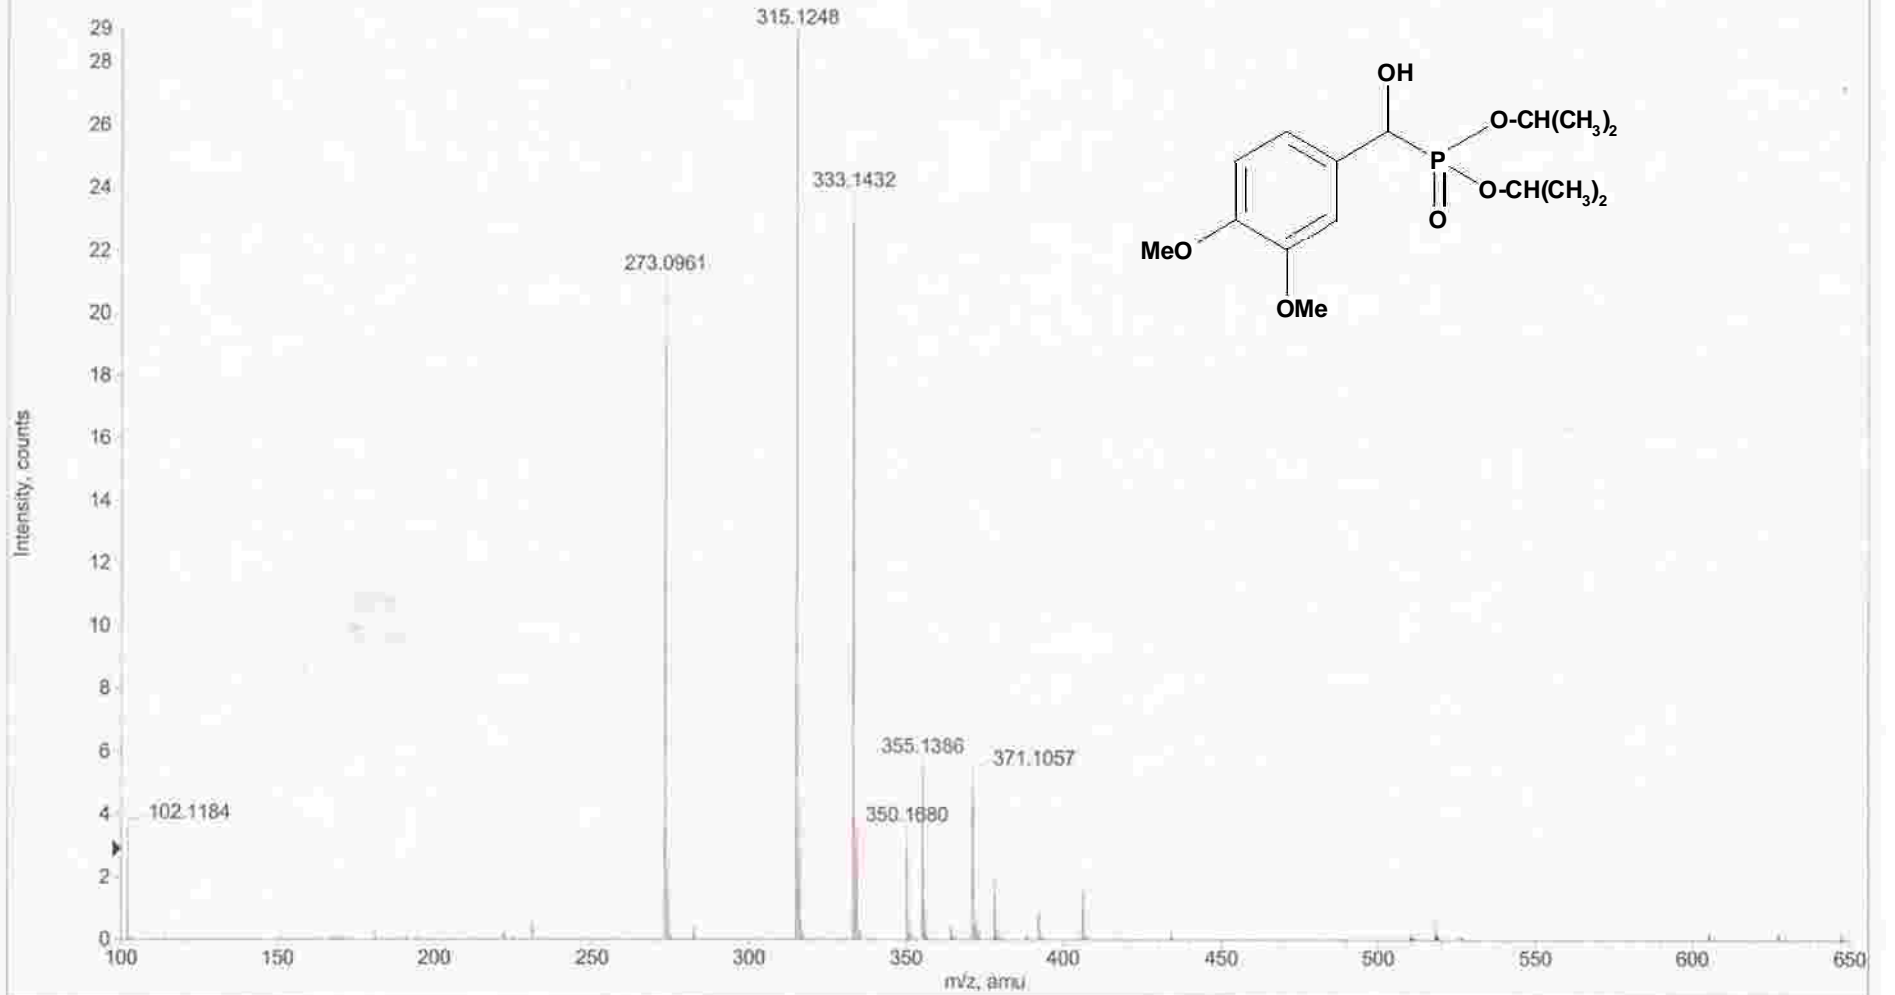



Dept of Chemistry, Shivaji University, Kolhapur

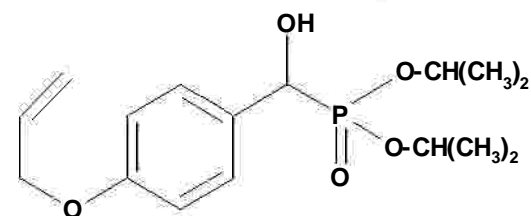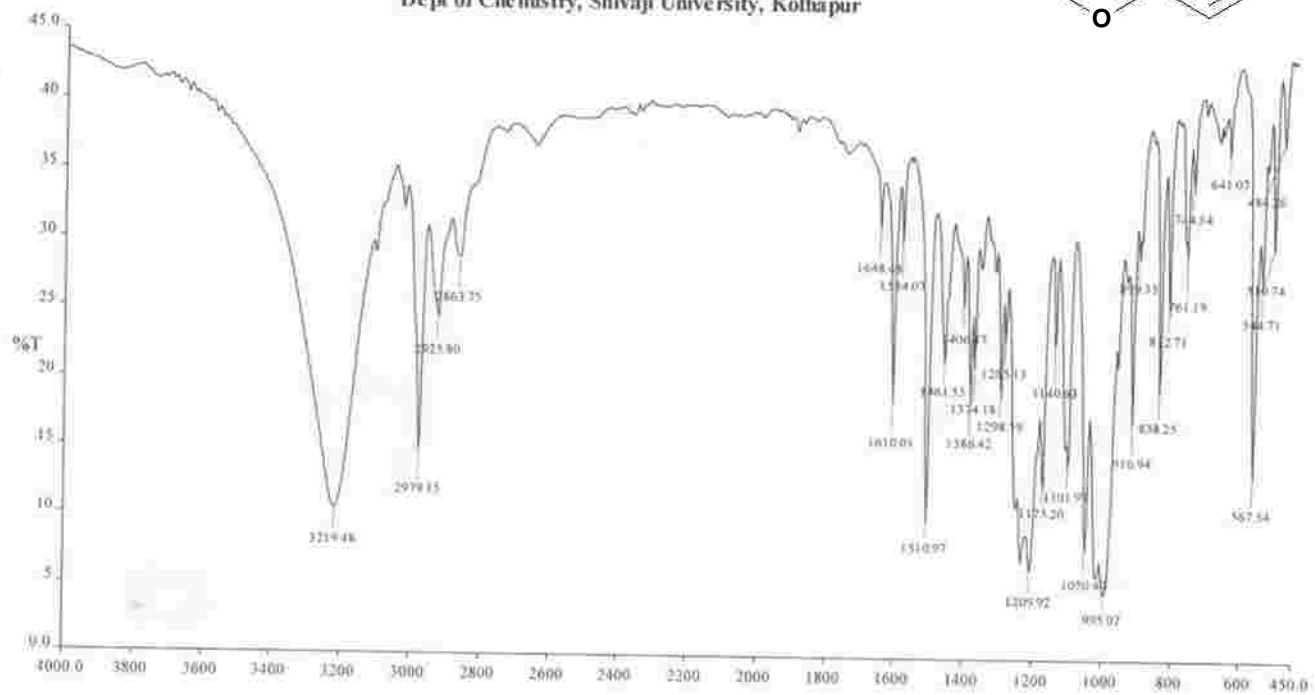

INSTRUMENT MODEL: PERKIN ELMER SPECTRUM 100,  
Instrument Serial Number: 79720

— Ipr-8.002 - 23-09-10

Date Created: 23 September, 2010 8:33 PM India Standard Time

ANALYST:

**cm-1**

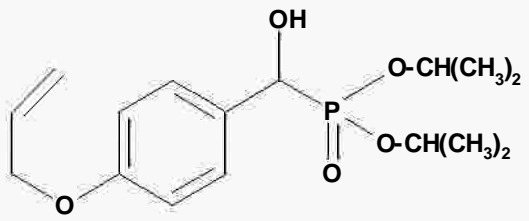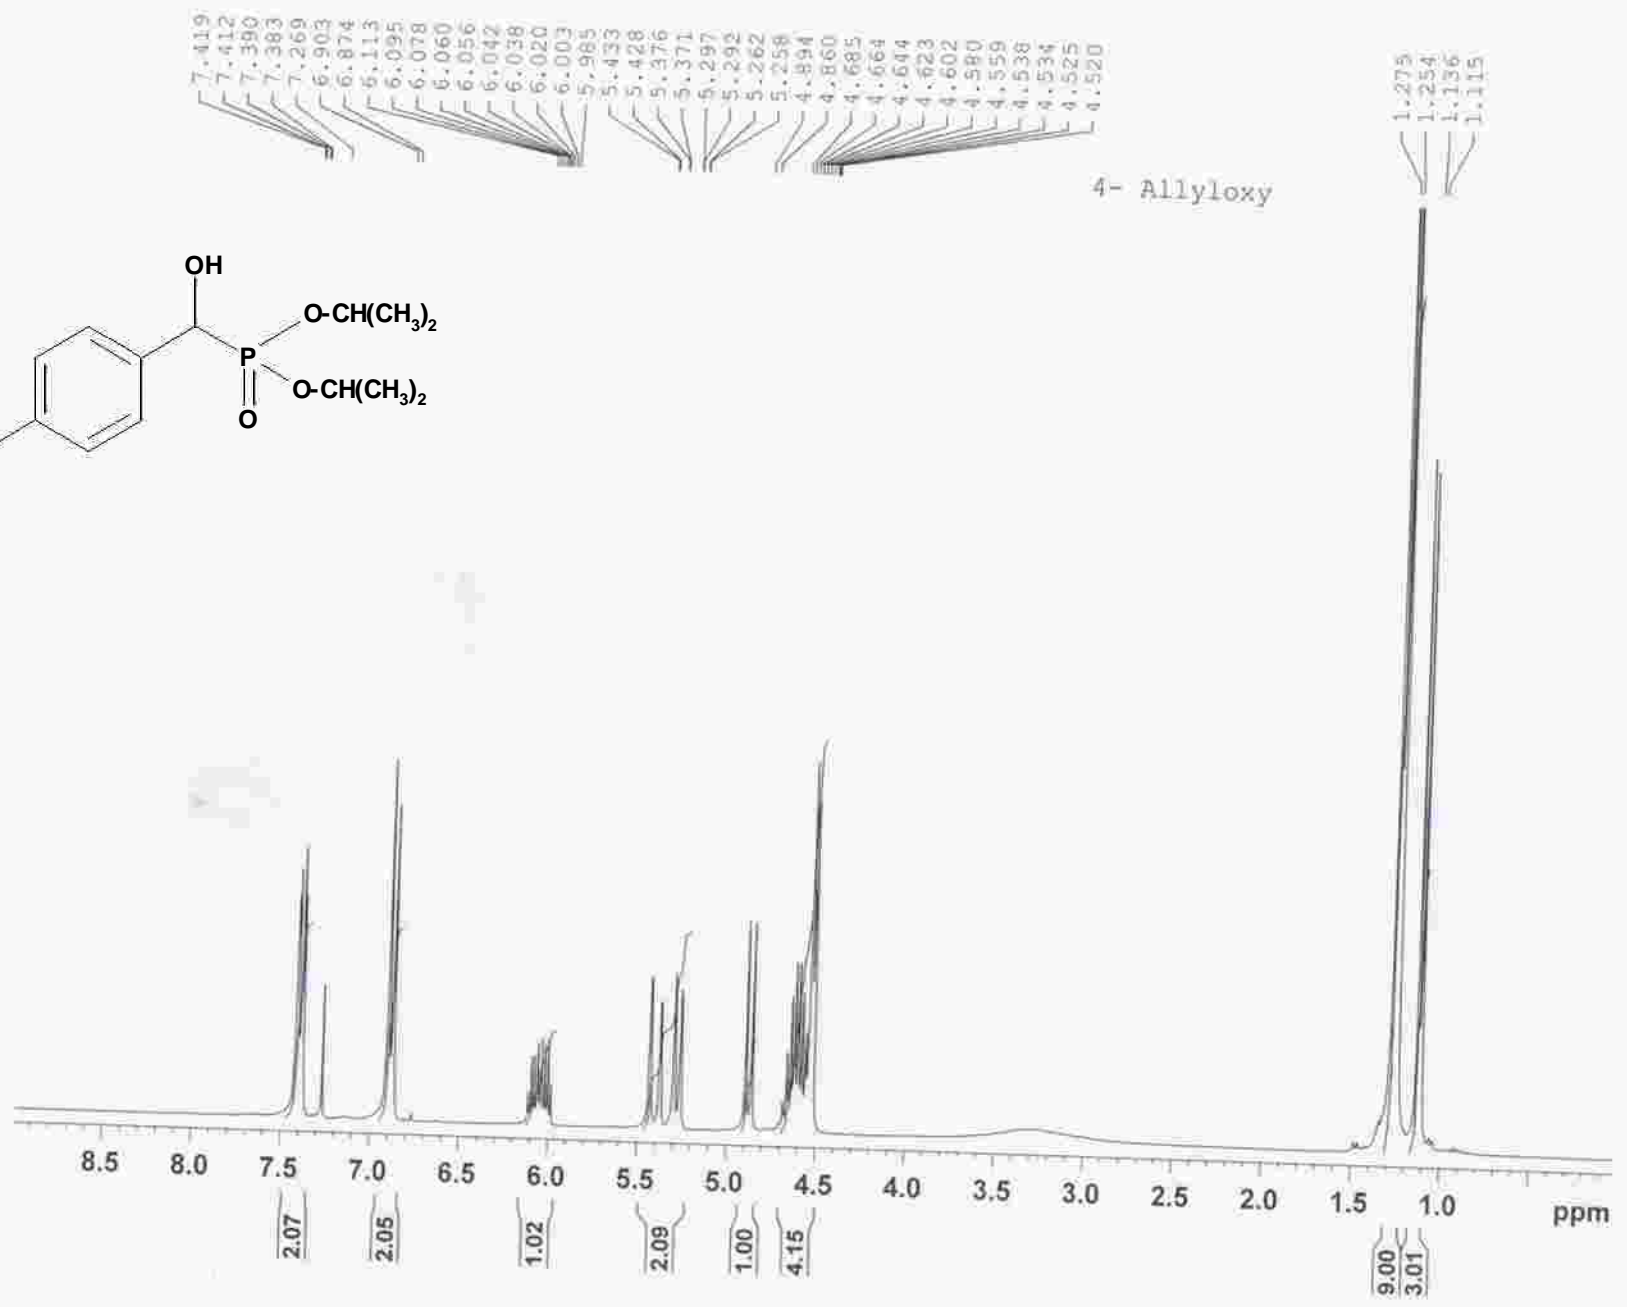

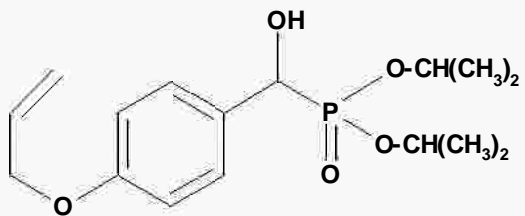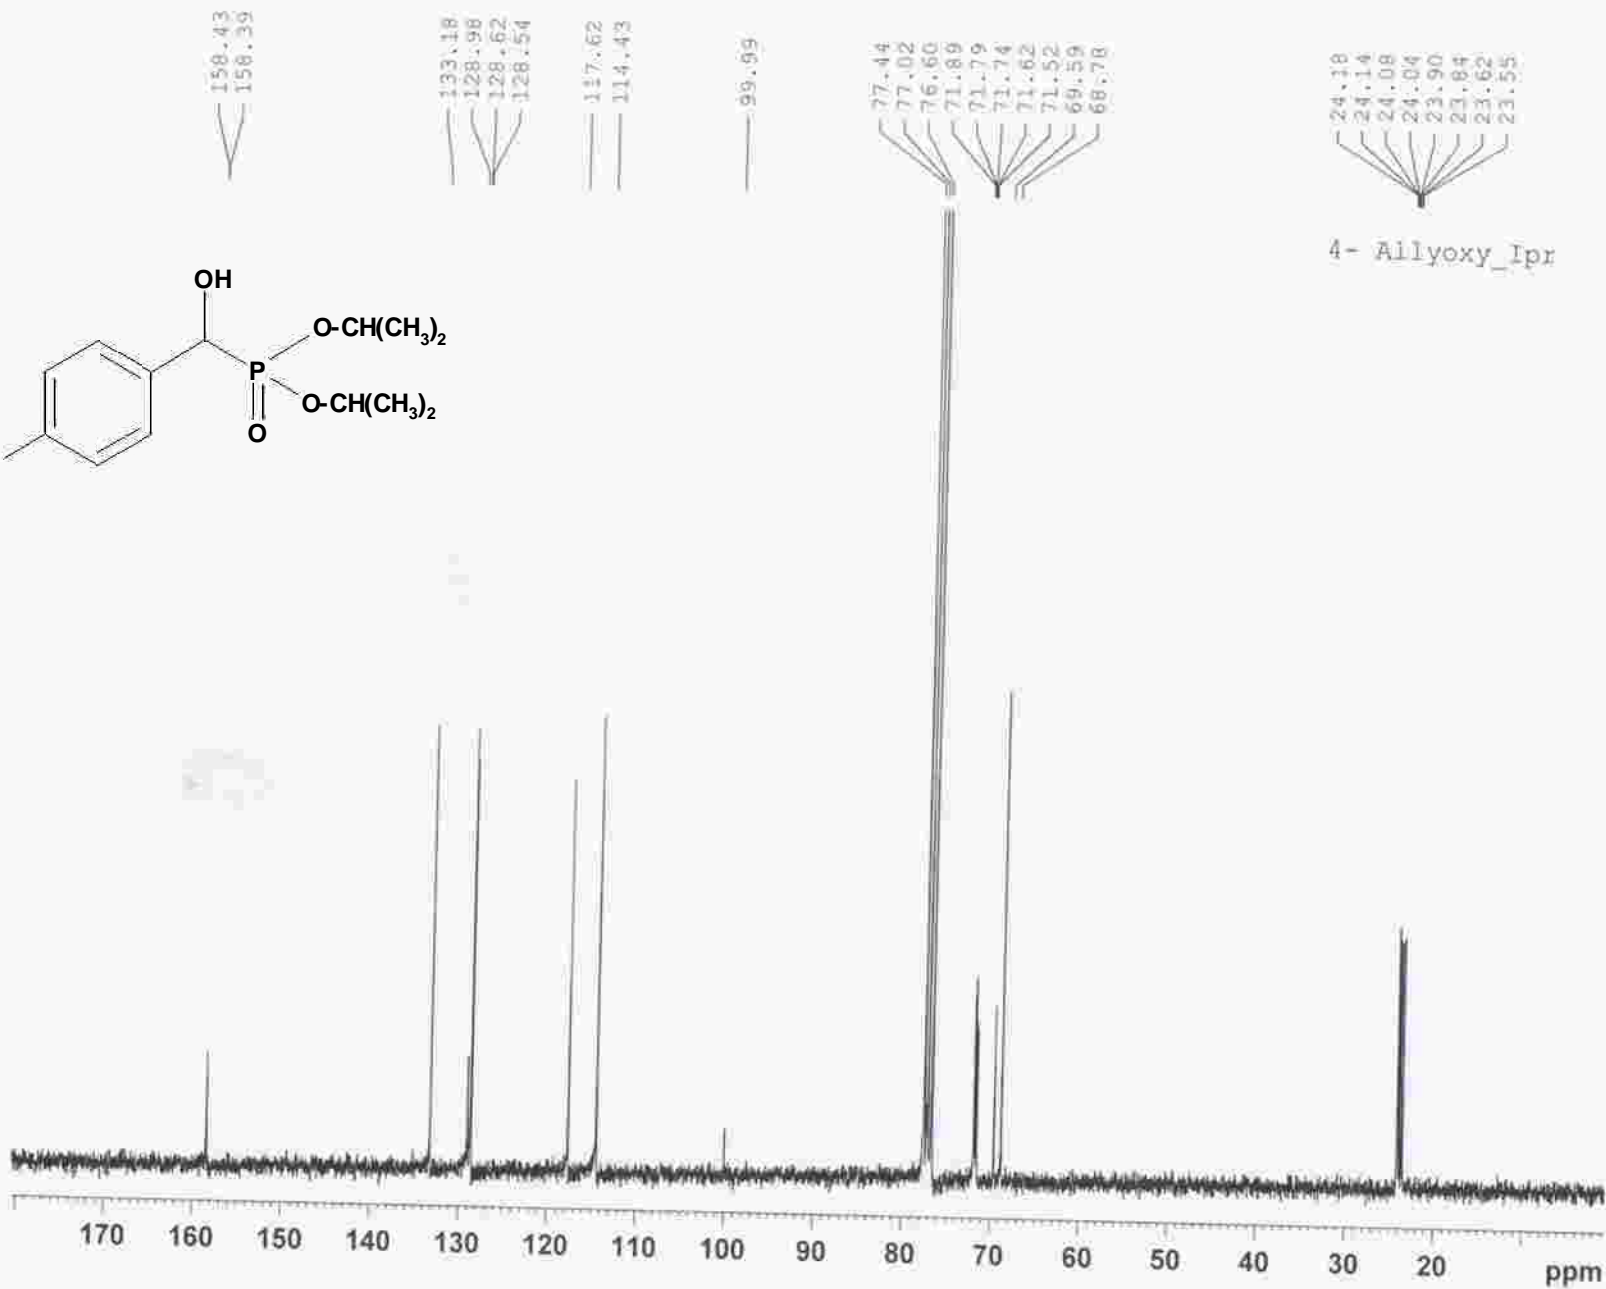

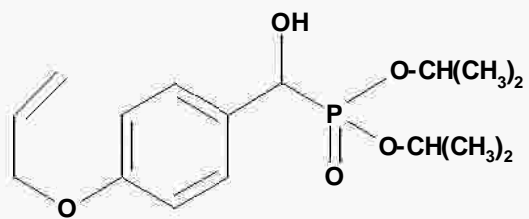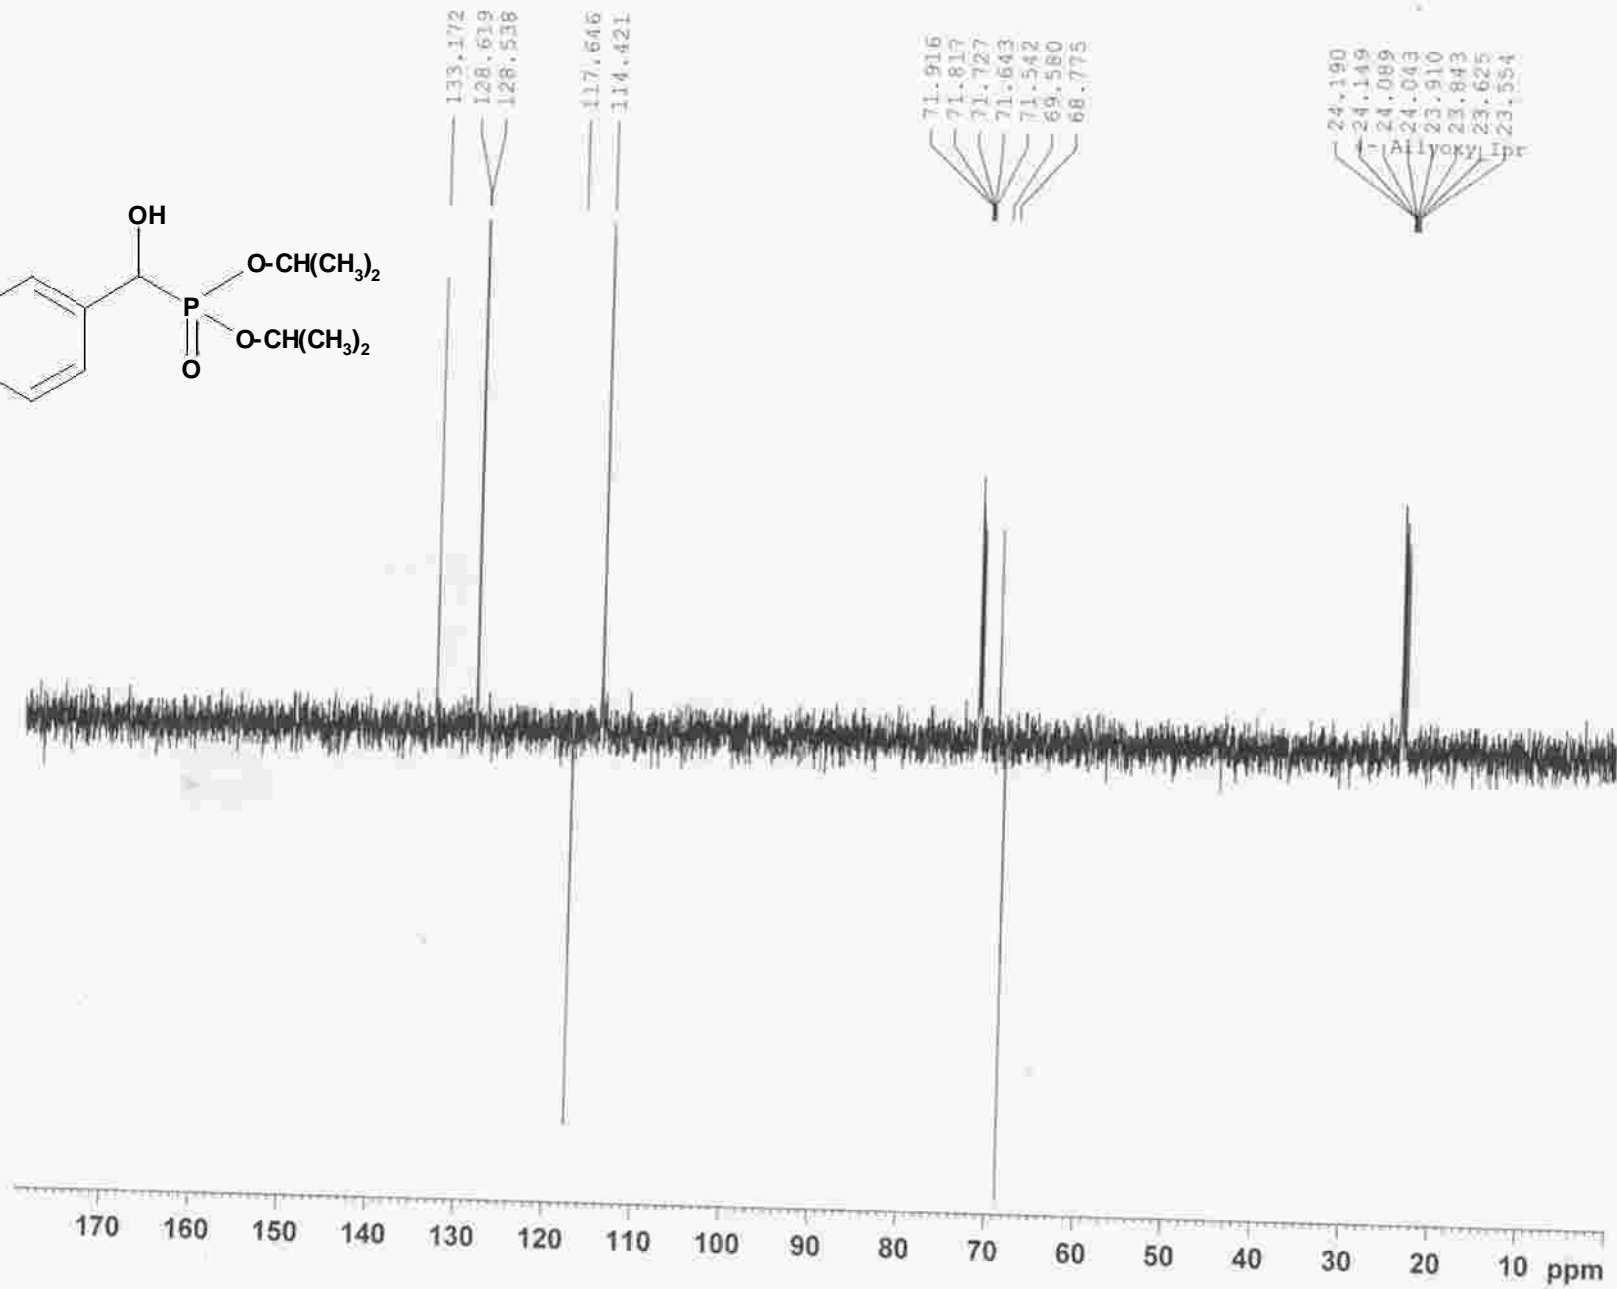

+TOF MS: 0.050 to 0.400 min from IPR-8.wiff  
a=3.31839173977164490e-004, ID=-3.40418683411422530e+001

Max 1.5 counts

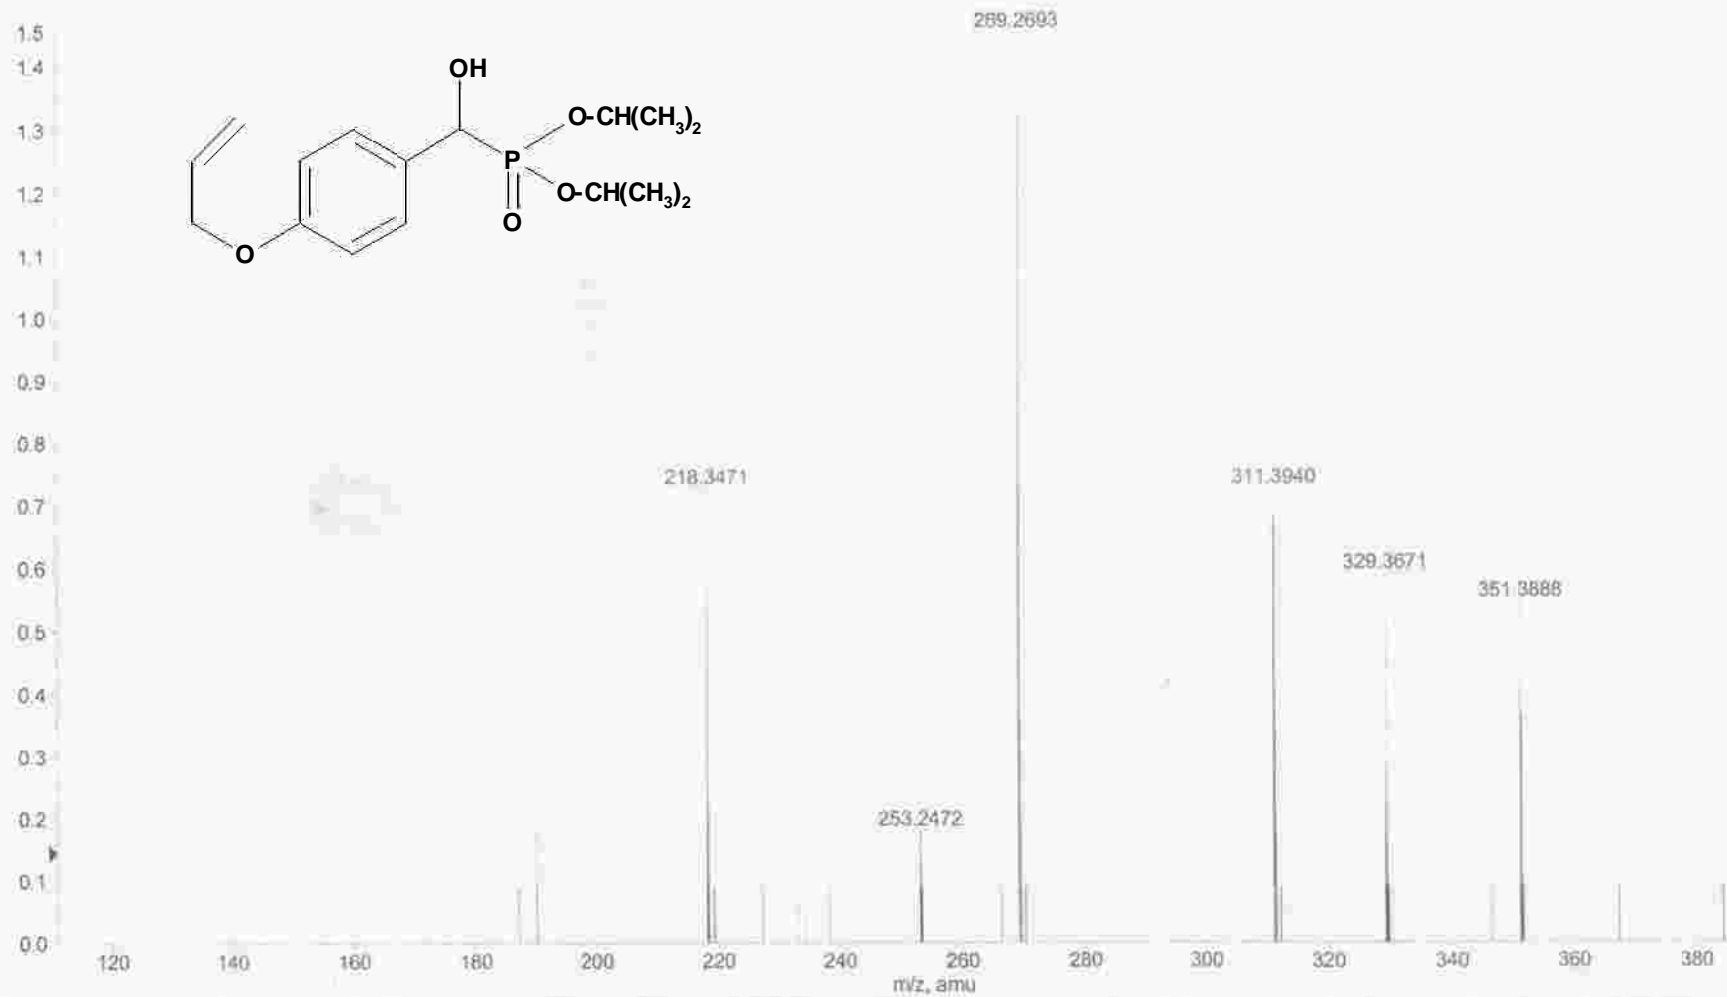

Dept of Chemistry, Shivaji University, Kolhapur

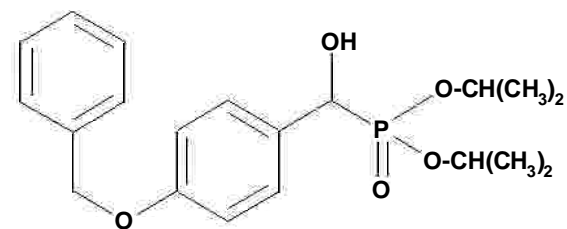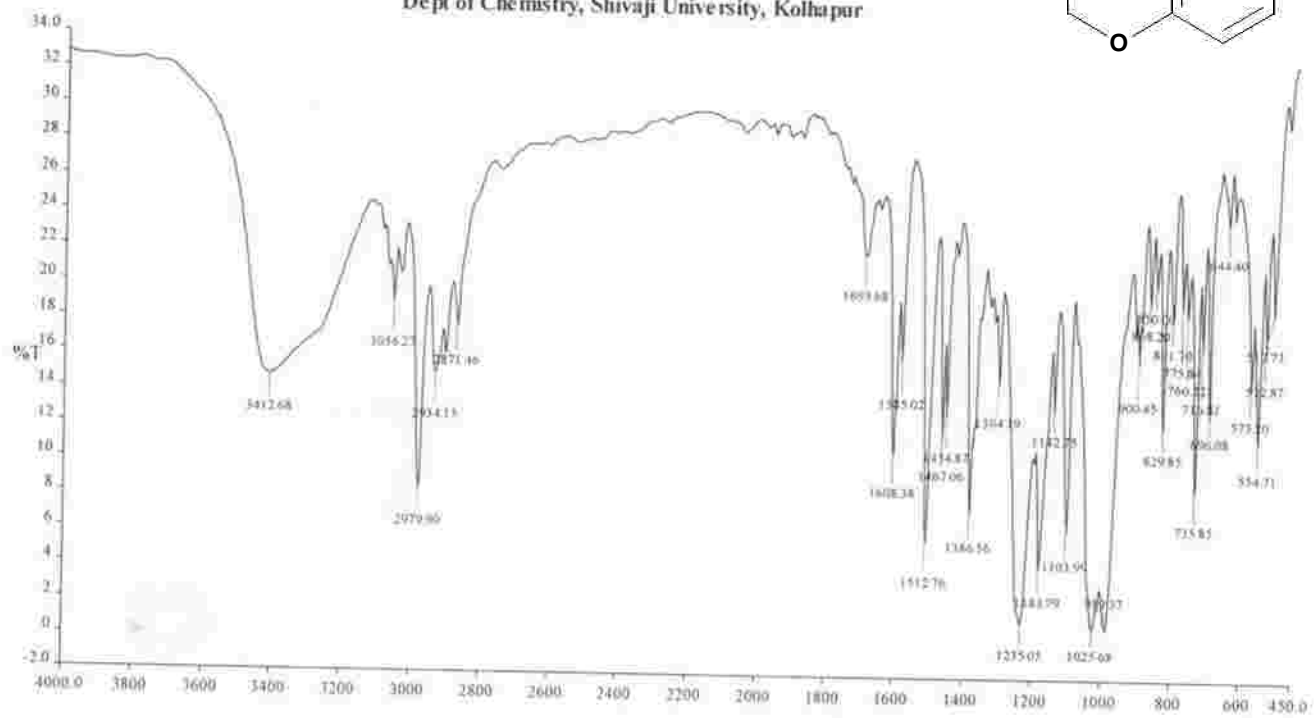

INSTRUMENT MODEL: PERKIN ELMER SPECTRUM 100.  
Instrument Serial Number: 79720

— IPR-9.002 - 23-09-10

*cm-1*

Date Created: 23 September, 2010 9:05 PM India Standard Time

ANALYSIS:

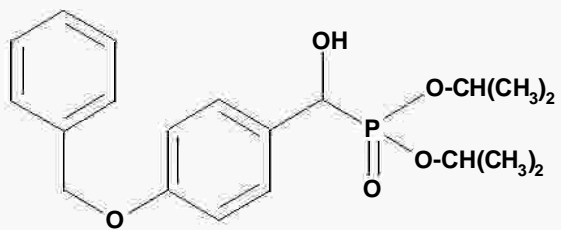

7.862  
7.835  
7.844  
7.833  
7.426  
7.420  
7.410  
7.405  
7.398  
7.383  
7.359  
7.350  
7.344  
7.332  
7.322  
7.309  
7.299  
7.260  
7.102  
7.073  
6.979  
6.950

5.160  
5.072  
4.912  
4.879  
4.676  
4.655  
4.635  
4.615  
4.594  
4.573

3.079

1.290  
1.287  
1.283  
1.270  
1.266  
1.146  
1.125

Benzyloxy\_Ipr

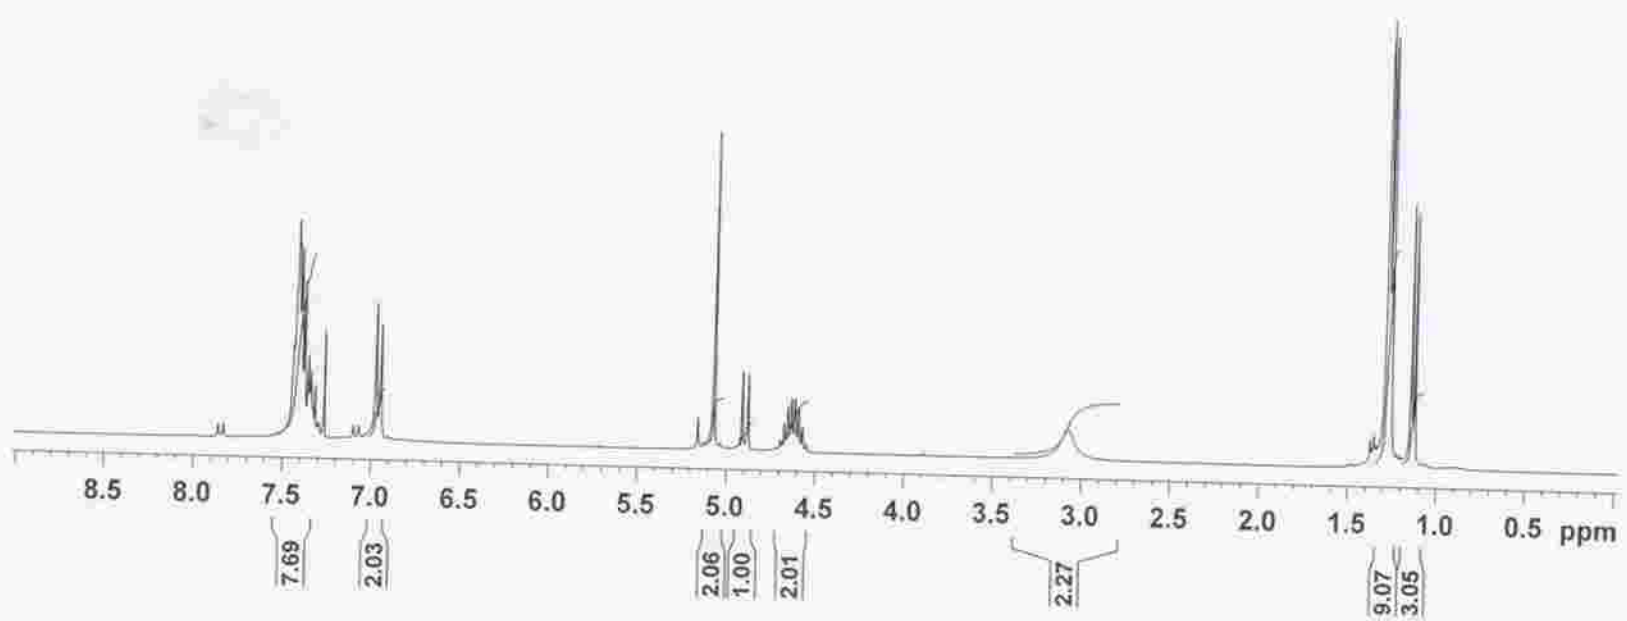

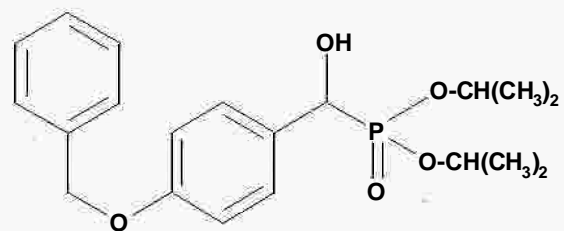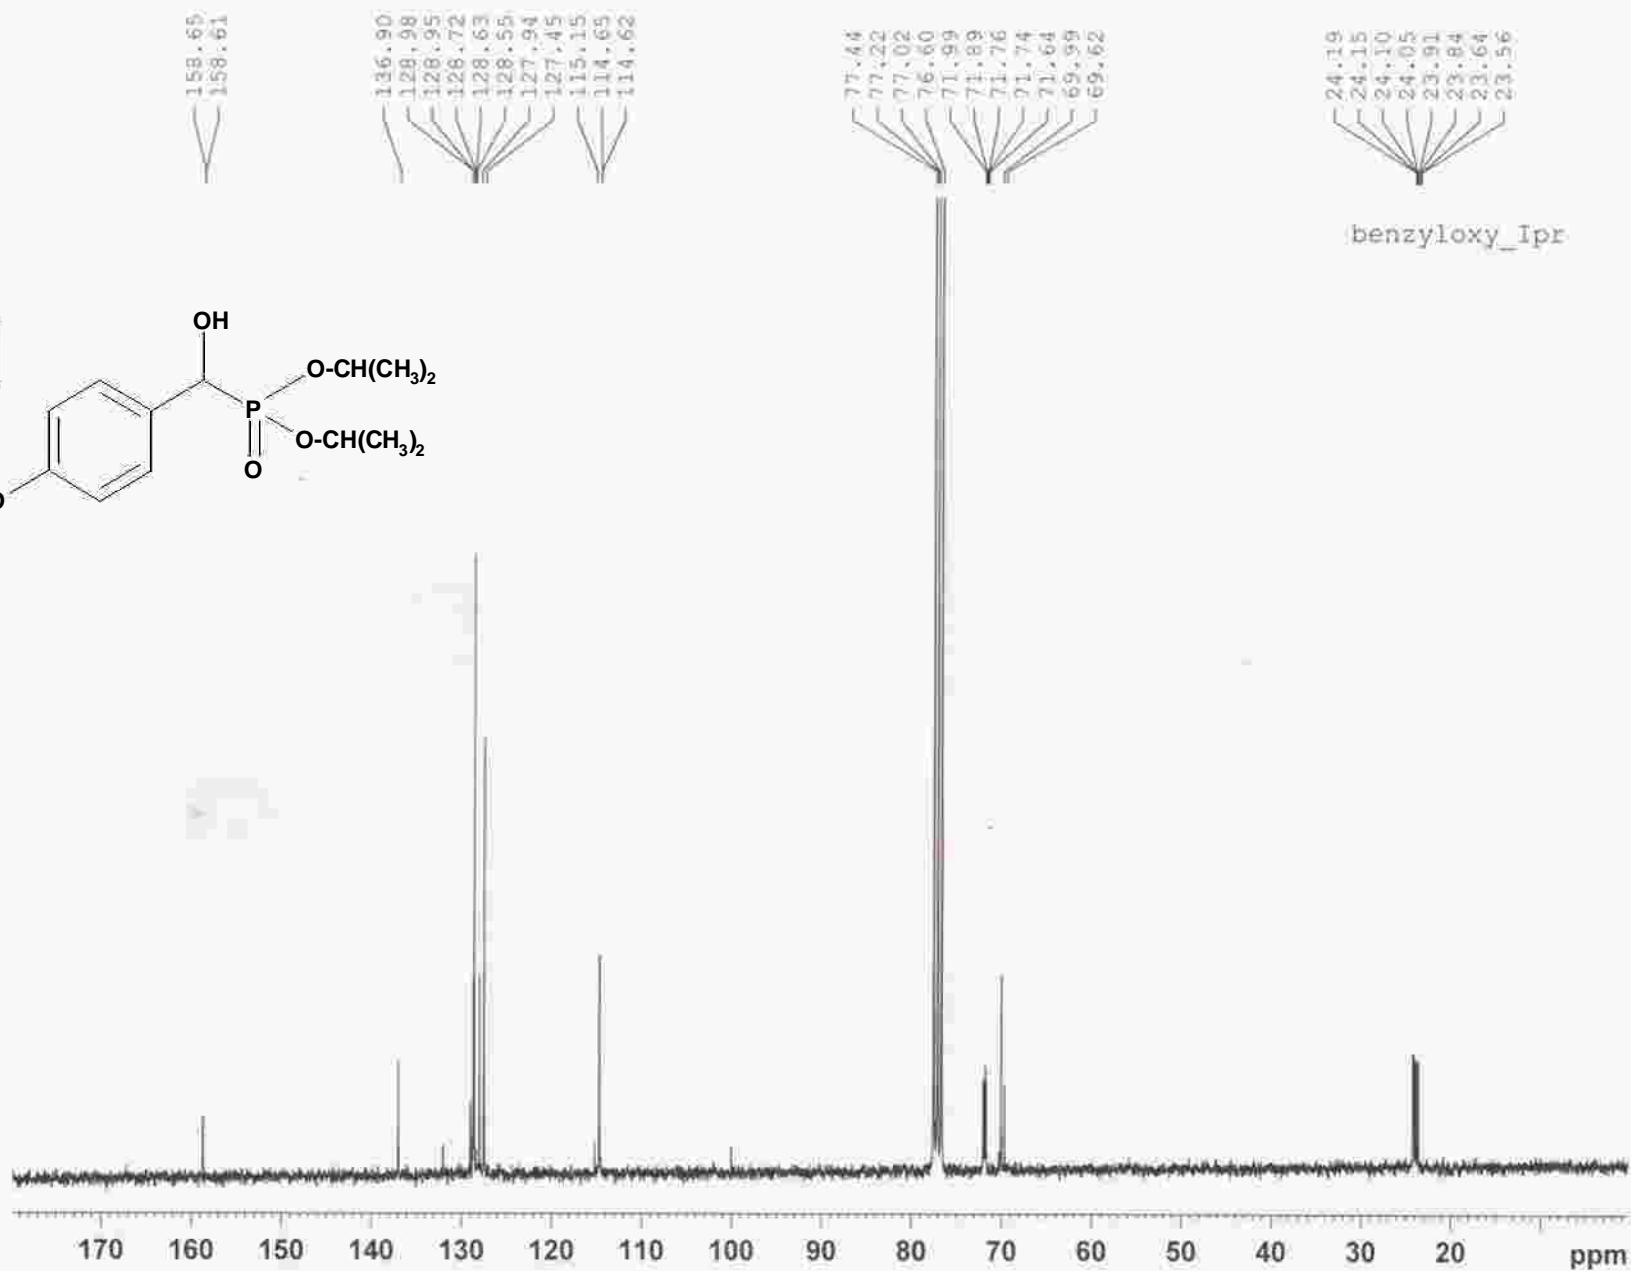



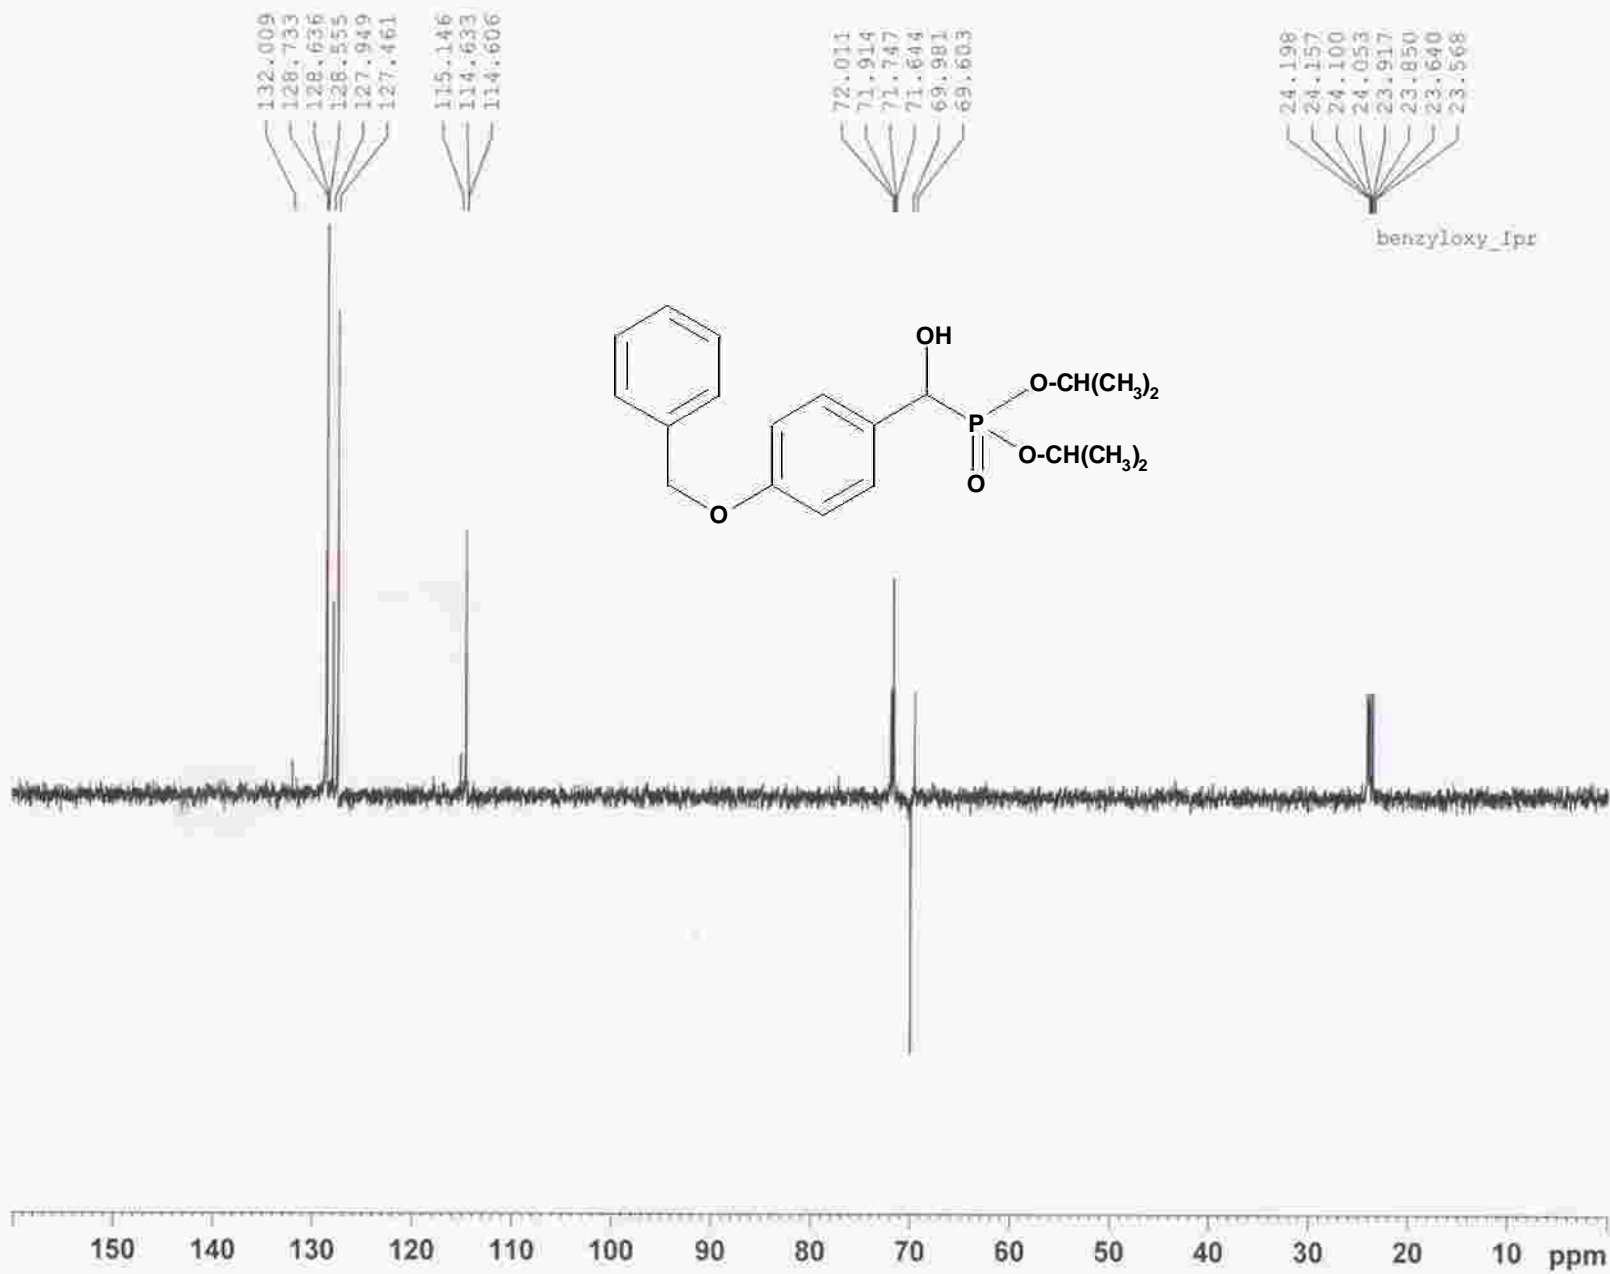

4126666 3 47347 922634

*i-P<sub>2</sub>-9*

+TOF MS: 0.033 to 1.133 min from LPR-9.wiff  
a=3.31839173977164490e-004 f0=-3.49418683411422530e+001

Max 1.3 counts

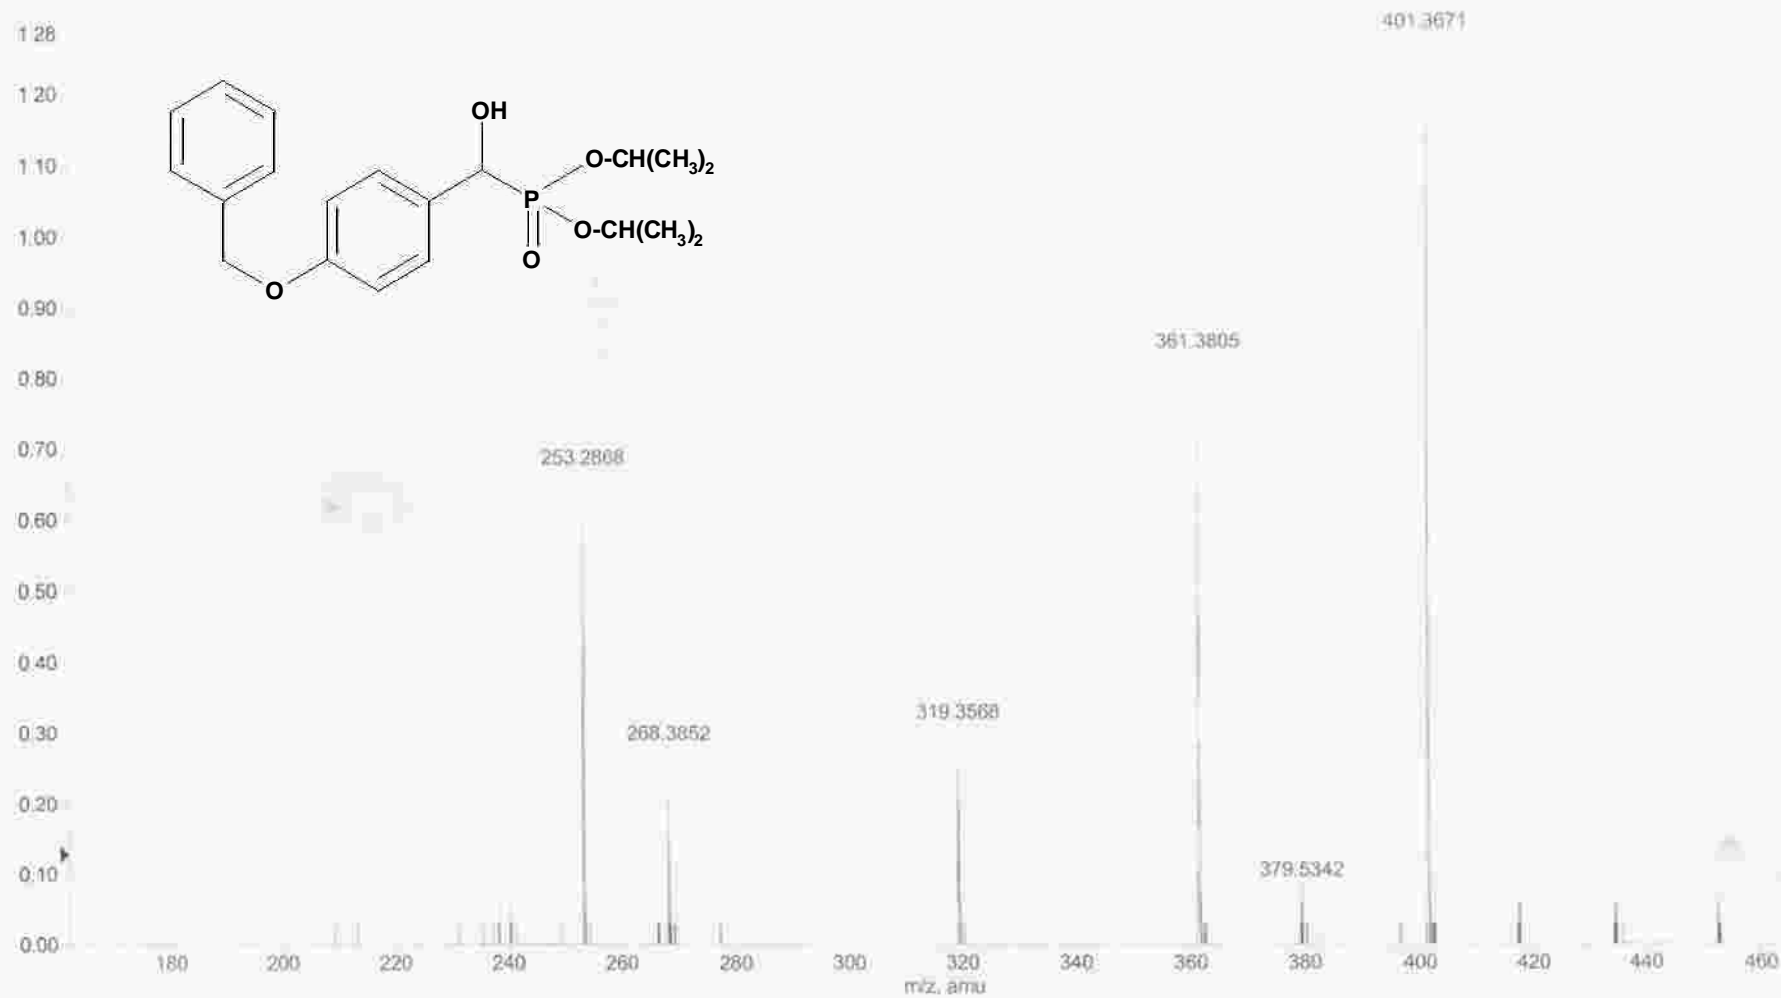

Dept of Chemistry, Shivaji University, Kolhapur

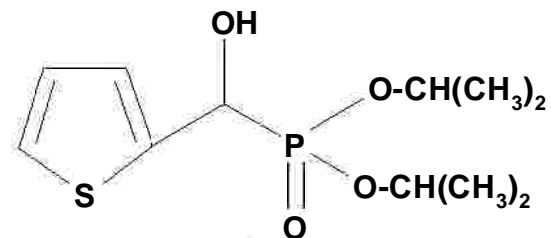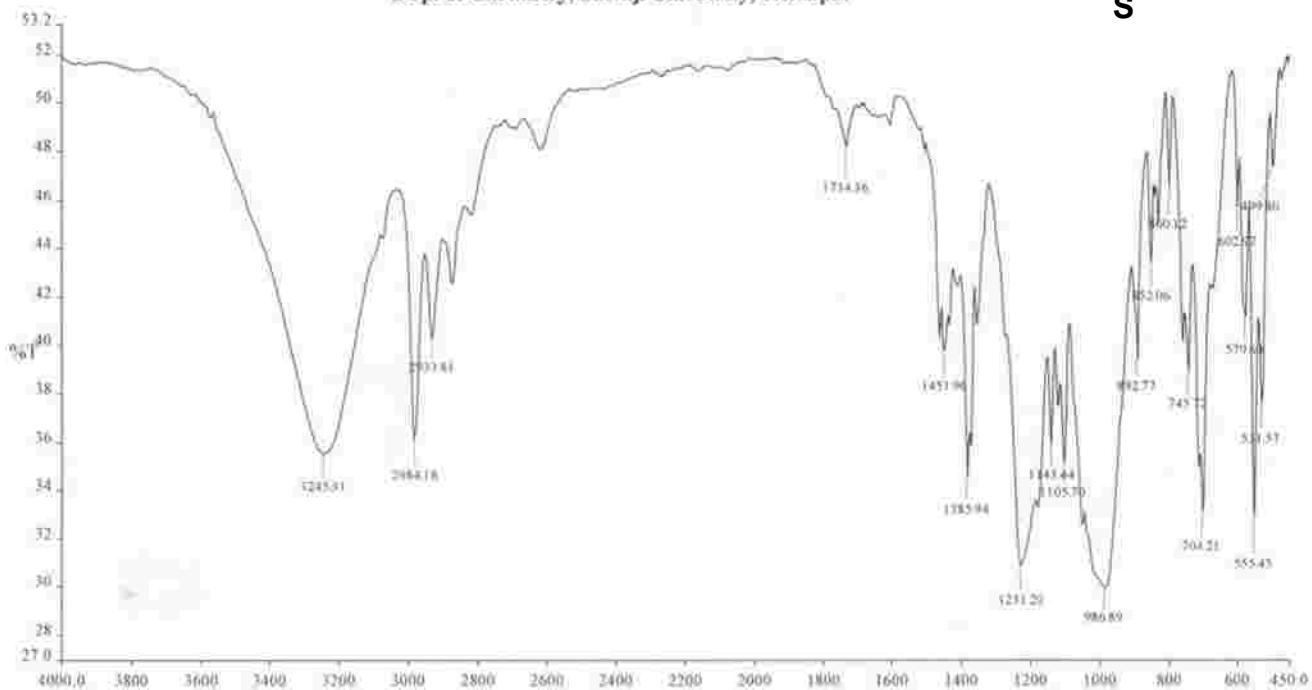

Date Created: 23 September, 2010 9:27 PM India Standard Time

INSTRUMENT MODEL: PERKIN ELMER SPECTRUM 100.  
Instrument Serial Number: 79720

ANALYSIS:

— Thiophene-DIP.002 - 25-09-10.

**cm-1**

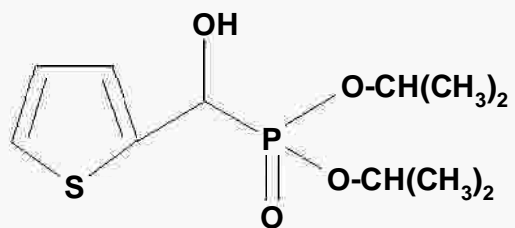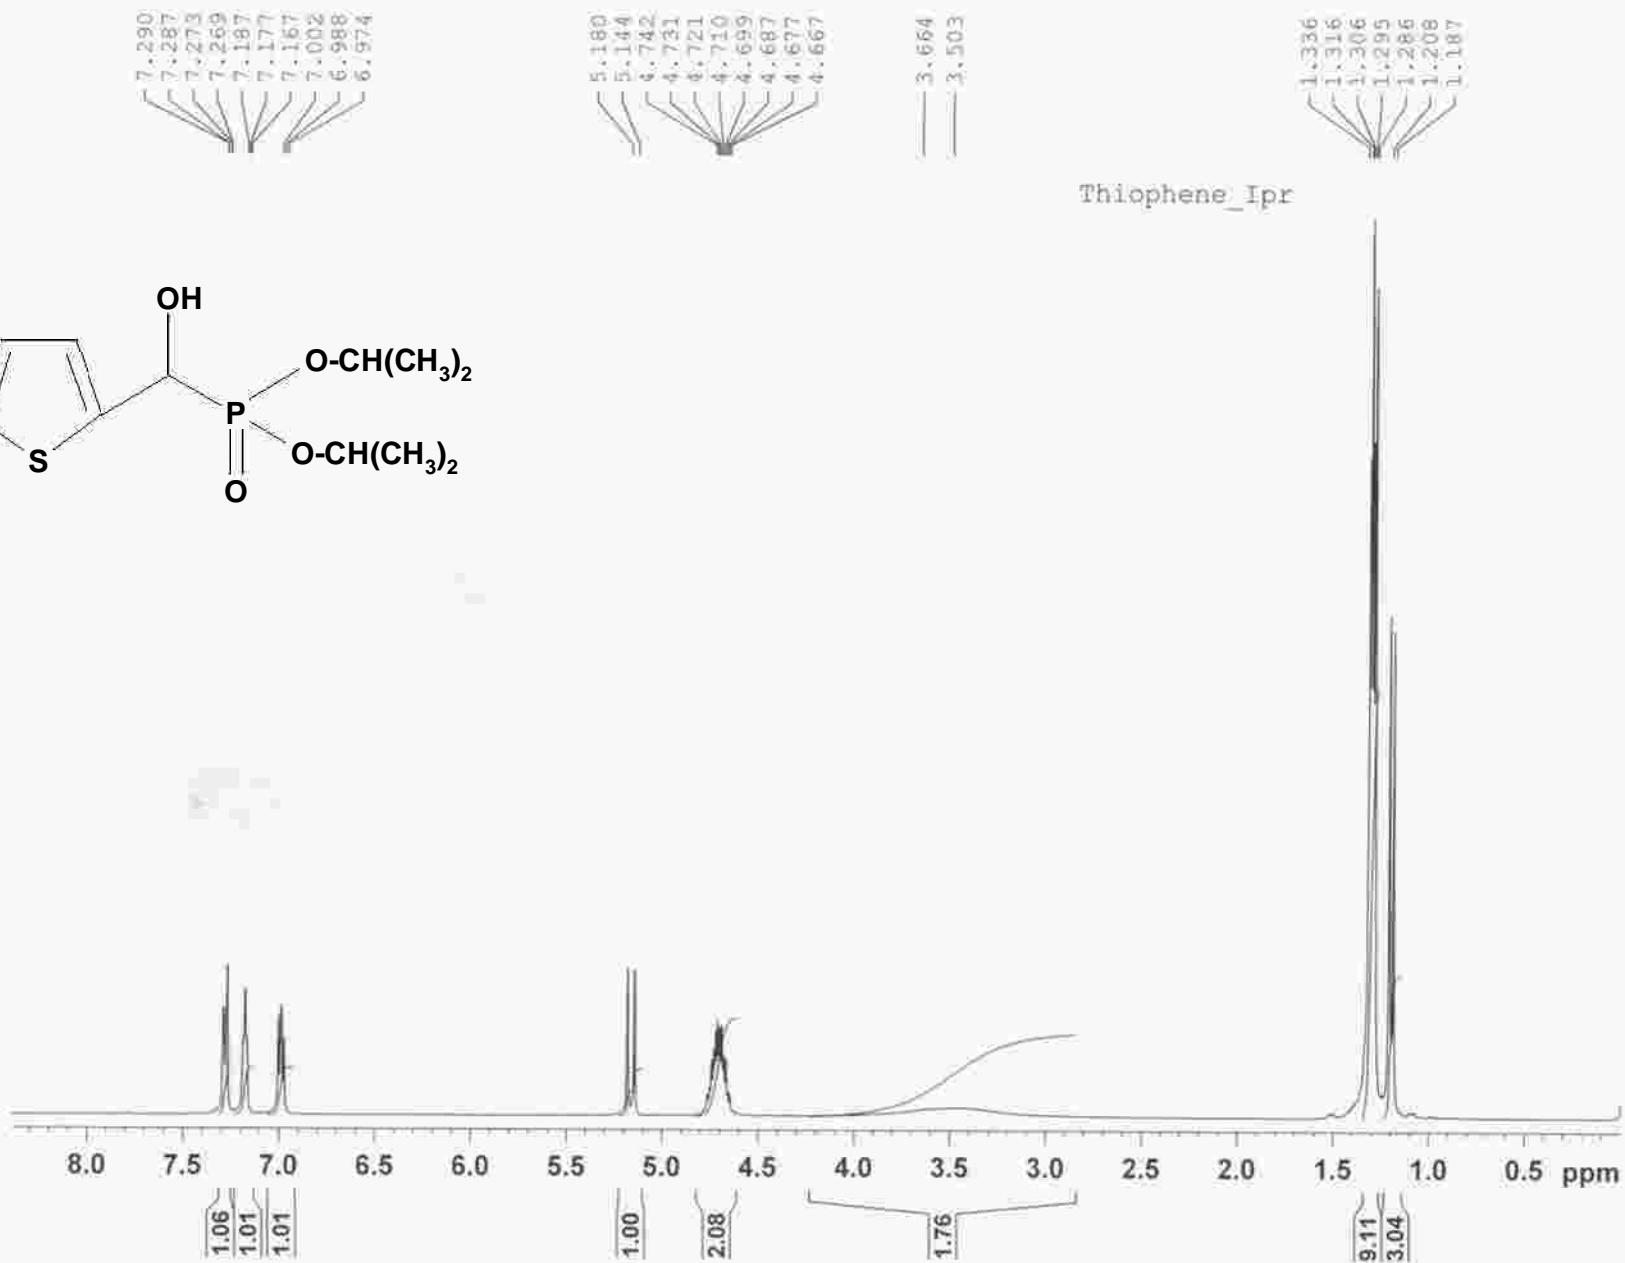

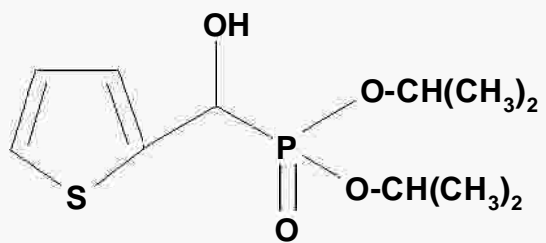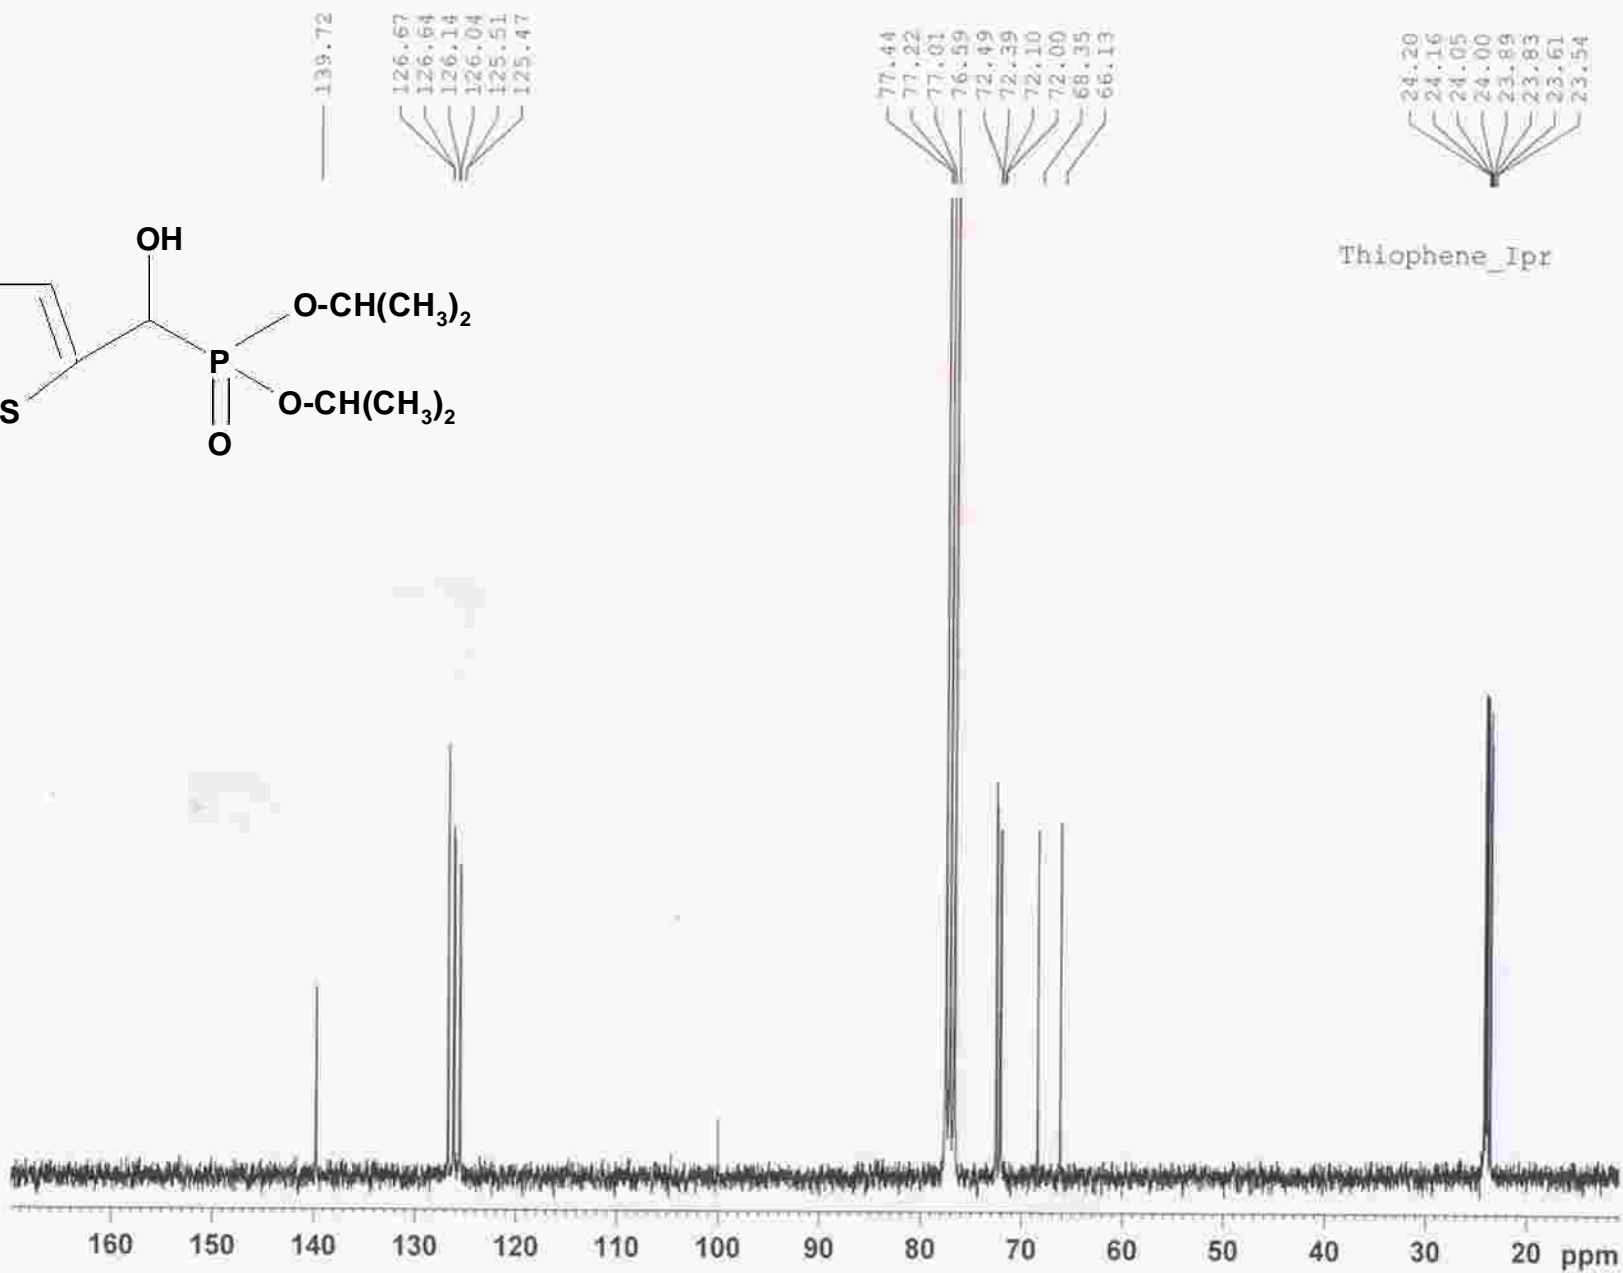

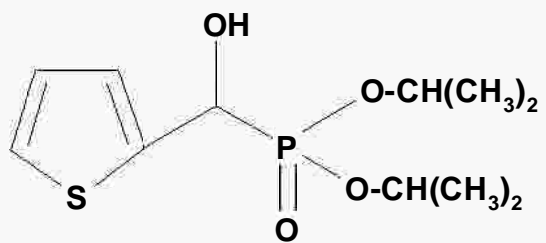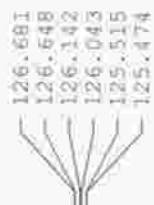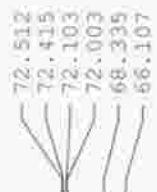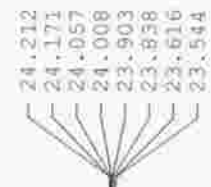

Thiophene\_Ipr

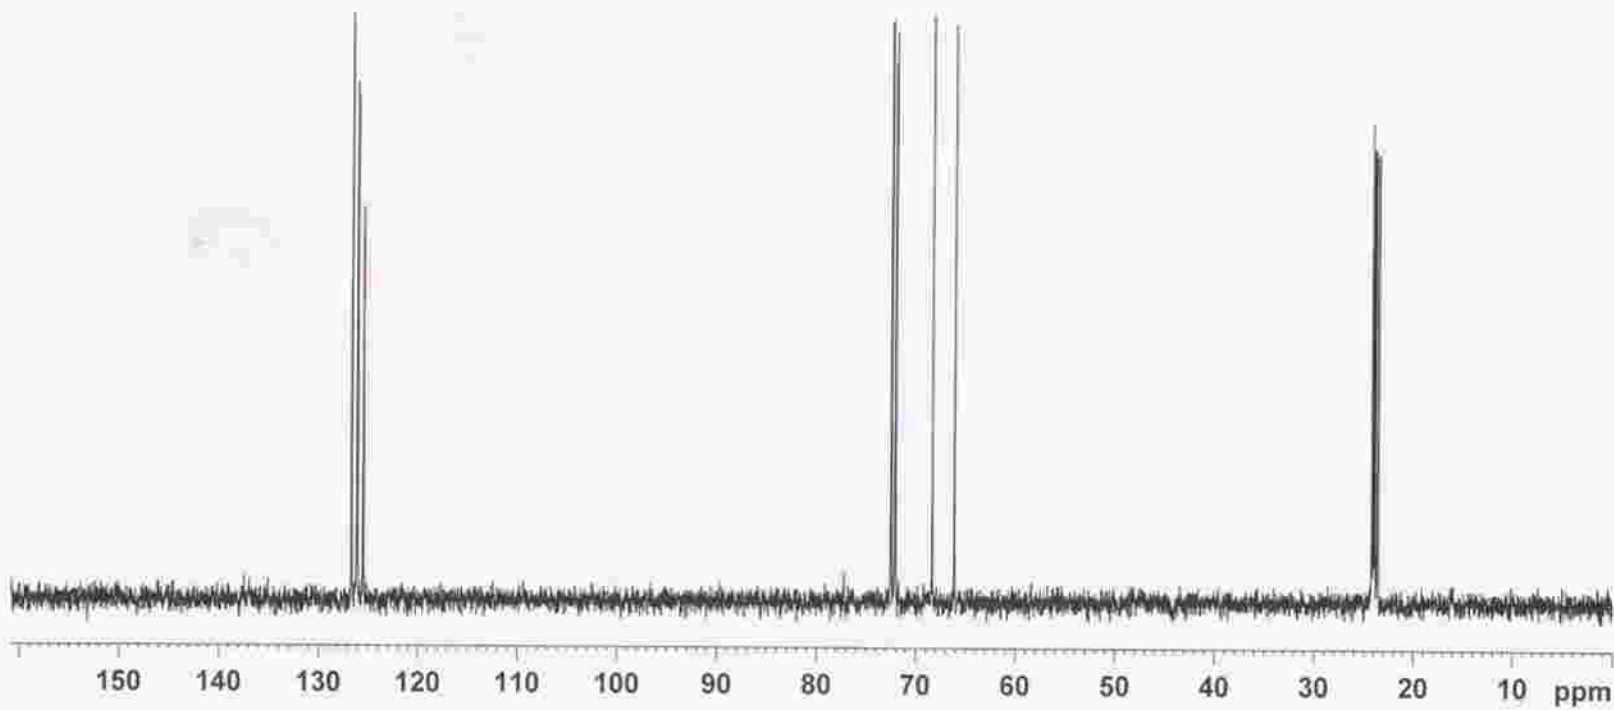

+TOF MS: 0.017 to 0.550 min from THIOPHEN\_DIPR.wiff  
a=3.37719425928799980e-004, t0=-3.54887063182468410e+001

Max. 335.5 counts

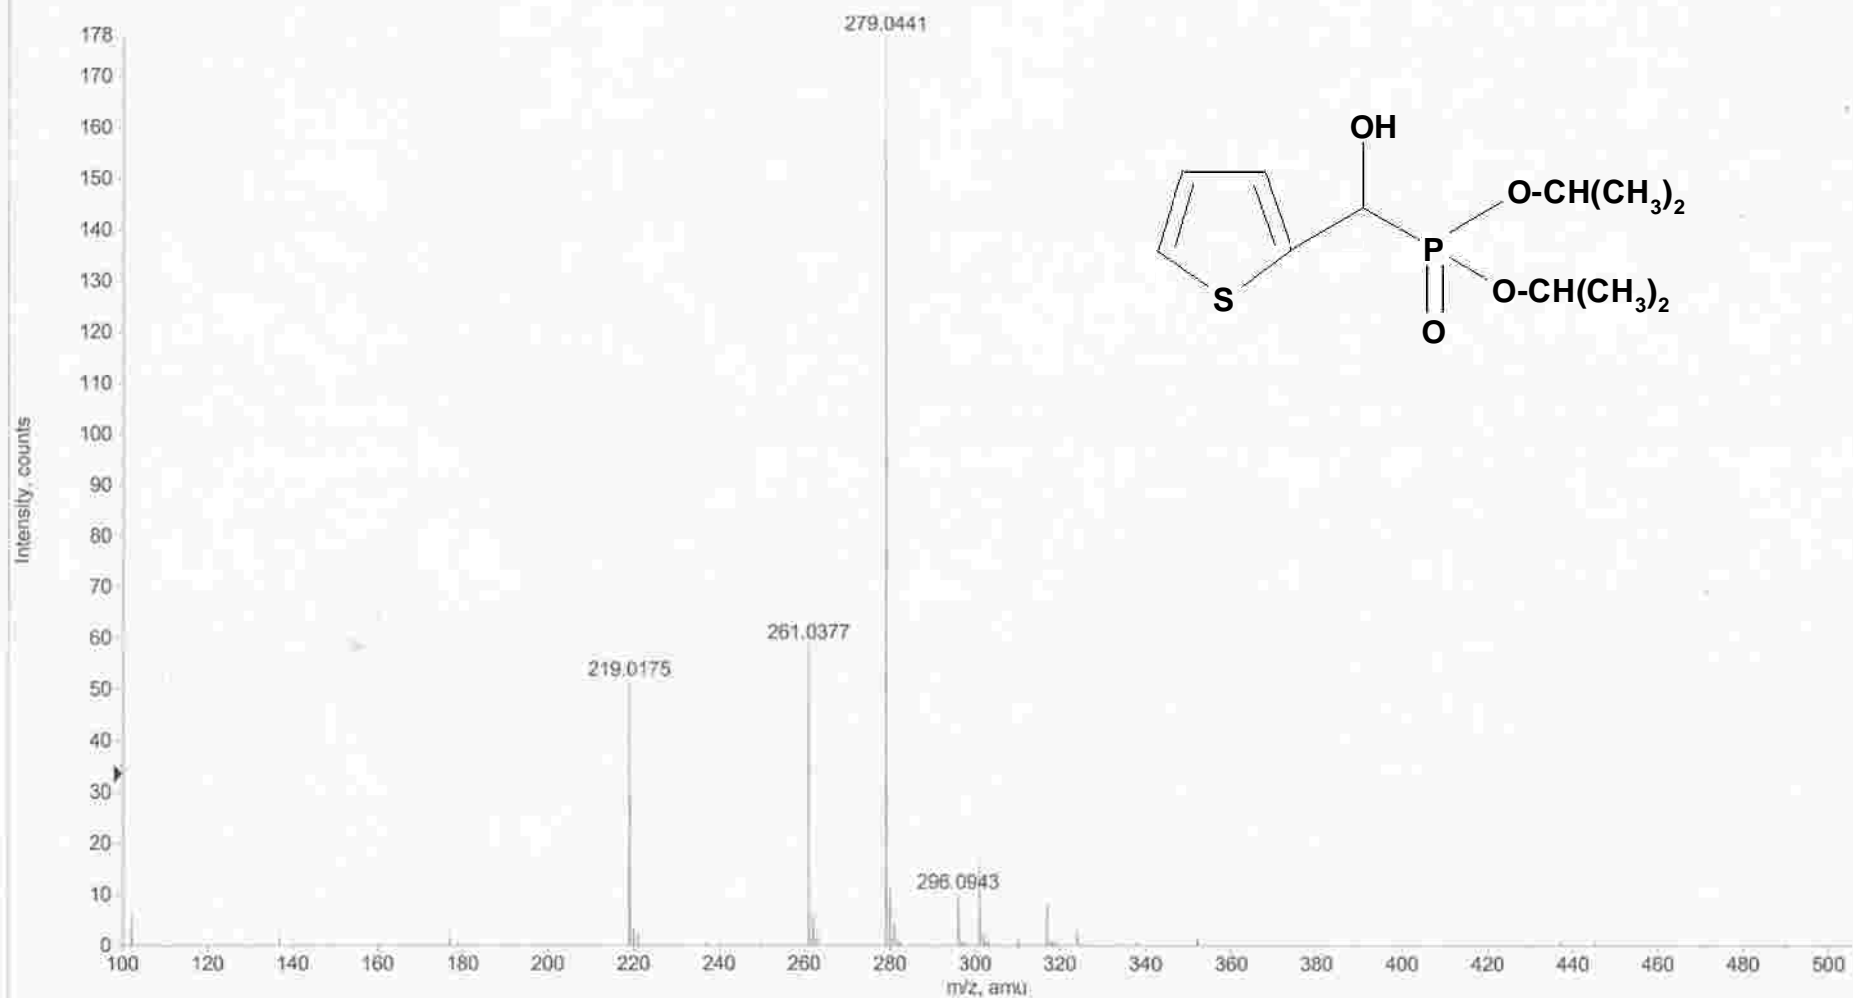

Supplement: mmc1 [file mmc1.pdf]
